# Supplementary material for: Three-component synthesis of 1,4-benzothiazines via iodide-catalyzed aerobic C–H sulfuration with elemental sulfur
Source: Royal Society of Chemistry journal article supplement (doi:10.1039/d0ob00074d), 2020-01-01

## Supporting Information

# Three-component synthesis of 1,4-benzothiazines via iodide-catalyzed aerobic C-H sulfuration with elemental sulfur

*Jingjing Jiang,<sup>a</sup> Xiaolong Tuo,<sup>a</sup> Zhuquan Fu,<sup>a</sup> Huawen Huang,<sup>a,\*</sup> and Guo-Jun  
Deng<sup>a,\*</sup>*

<sup>a</sup> Key Laboratory for Green Organic Synthesis and Application of Hunan Province, Key  
Laboratory of Environmentally Friendly Chemistry and Application of Ministry of Education,  
College of Chemistry, Xiangtan University, Xiangtan 411105, China. E-mail:  
hwhuang@xtu.edu.cn; gjdeng@xtu.edu.cn

## Table of Contents

|                                                                               |           |
|-------------------------------------------------------------------------------|-----------|
| <b>General information</b>                                                    | <b>2</b>  |
| <b>General procedure for the synthesis of 1,4-benzothiazine</b>               | <b>2</b>  |
| <b>Characterization of all products</b>                                       | <b>2</b>  |
| <b>Crystal data of 4a</b>                                                     | <b>23</b> |
| <b>Copies of <sup>1</sup>H and <sup>13</sup>C NMR spectra of all products</b> | <b>32</b> |

## General information

All reactions were carried out under oxygen atmosphere unless otherwise noted. Column chromatography was performed using silica gel (200-300 mesh).  $^1\text{H}$  NMR and  $^{13}\text{C}$  NMR spectra were recorded on Bruker-AV (400 and 100 MHz, respectively) instrument internally referenced to tetramethylsilane (TMS) or chloroform signals. Mass spectra were measured on Agilent 5975 GC-MS instrument (EI). High-resolution mass spectra were recorded with the Thermo Scientific LTQ Orbitrap XL mass spectrometer (ESI). The structures of compounds were further corroborated by comparing their  $^1\text{H}$  NMR,  $^{13}\text{C}$  NMR data and MS data with those of literature. All reagents were obtained from commercial suppliers and used without further purification. The molecular weight of S is determined to be 32 g/mol unless otherwise noted.

## General procedure for the synthesis of 1,4-benzothiazine

Acetophenone (**1a**, 47  $\mu\text{L}$ , 0.4 mmol), aniline (**2a**, 37  $\mu\text{L}$ , 0.4 mmol), S (25.6 mg, 0.8 mmol), KI (50 mol%), DMSO (4 equiv) and chlorobenzene (PhCl, 2.2 mL) were added successfully to a 10 mL oven-dried reaction vessel. The sealed reaction vessel was stirred at 150  $^\circ\text{C}$  for 16 h under oxygen atmosphere. After cooling to room temperature, the reaction was diluted with ethyl acetate (5 mL) and filtered through a short column of silica gel with additional ethyl acetate (15 mL), the volatiles were removed under reduced pressure. The residue was purified by column chromatography on silica gel (petroleum ether/EtOA: 200/1) to yield the desired product **3a** as yellow solid (44.6 mg, 71%), mp: 142-143  $^\circ\text{C}$ .

## Characterization data of products

### (Z)-N,3-Diphenyl-2H-benzo[b][1,4]thiazin-2-imine (**3a**)

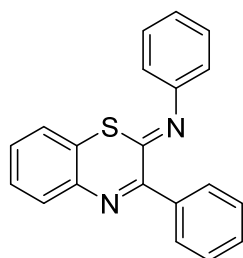

The reaction was conducted with acetophenone (**1a**, 47  $\mu\text{L}$ , 0.4 mmol), aniline (**2a**, 37  $\mu\text{L}$ , 0.4 mmol) and S (25.6 mg, 0.8 mmol). The residue was purified by column chromatography on silica gel (petroleum ether/EtOAc: 200/1) to yield the desired product **3a** (44.6 mg, 71%) as yellow solid.

mp: 142-143 °C.

<sup>1</sup>H NMR (400 MHz, CDCl<sub>3</sub>) δ 8.14 – 8.00 (m, 2H), 7.75 (dd, *J* = 8.0, 1.5 Hz, 1H), 7.54 – 7.40 (m, 5H), 7.36 – 7.18 (m, 3H), 7.12 (dd, *J* = 7.8, 1.5 Hz, 1H), 7.01 – 6.87 (m, 2H); <sup>13</sup>C NMR (100 MHz, CDCl<sub>3</sub>) δ 155.8, 150.0, 149.6, 137.8, 137.6, 131.8, 130.0, 129.8, 129.6, 128.6, 127.9, 127.1, 125.4, 125.2, 124.4, 118.8; HRMS (ESI) *m/z* calcd for C<sub>20</sub>H<sub>15</sub>N<sub>2</sub>S<sup>+</sup> (M+H)<sup>+</sup> 315.0951, found 315.0954.

**(Z)-N-Phenyl-3-(p-tolyl)-2H-benzo[b][1,4]thiazin-2-imine (3b)**

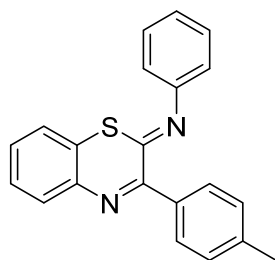

The reaction was conducted with 1-(p-tolyl)ethan-1-one (**1b**, 54 μL, 0.4 mmol), aniline (**2a**, 37 μL, 0.4 mmol) and S (25.6 mg, 0.8 mmol). The residue was purified by column chromatography on silica gel (petroleum ether/EtOAc: 200/1) to yield the desired product **3b** (33.5 mg, 51%) as orange solid. mp: 155-156 °C.

<sup>1</sup>H NMR (400 MHz, CDCl<sub>3</sub>) δ 7.96 (d, *J* = 7.9 Hz, 2H), 7.73 (d, *J* = 7.9 Hz, 1H), 7.46 – 7.40 (m, 2H), 7.33 – 7.28 (m, 1H), 7.27 – 7.17 (m, 4H), 7.09 (d, *J* = 7.8 Hz, 1H), 6.91 (d, *J* = 7.6 Hz, 2H), 2.39 (s, 3H); <sup>13</sup>C NMR (100 MHz, CDCl<sub>3</sub>) δ 155.7, 150.1, 149.7, 140.3, 137.9, 134.8, 131.7, 129.8, 129.6, 128.6, 128.3, 127.0, 125.3, 125.1, 124.3, 118.8, 21.4; HRMS (ESI) *m/z* calcd for C<sub>21</sub>H<sub>17</sub>N<sub>2</sub>S<sup>+</sup> (M+H)<sup>+</sup> 329.1107, found 329.1112.

**(Z)-3-(4-Isobutylphenyl)-N-phenyl-2H-benzo[b][1,4]thiazin-2-imine (3c)**

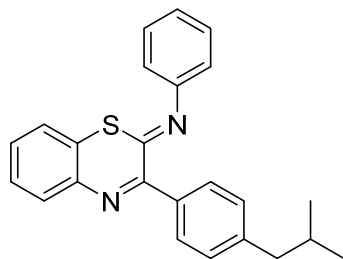

The reaction was conducted with 1-(4-isobutylphenyl)ethan-1-one (**1c**, 76 μL, 0.4 mmol), aniline (**2a**, 37 μL, 0.4 mmol) and S (25.6 mg, 0.8 mmol). The residue was purified by column chromatography on silica gel (petroleum ether/EtOAc: 200/1) to yield the desired product **3c** (43.7

mg, 59%) as yellow solid. mp: 94-95 °C.

<sup>1</sup>H NMR (400 MHz, CDCl<sub>3</sub>) δ 8.00 (d, *J* = 8.2 Hz, 2H), 7.74 (d, *J* = 7.9 Hz, 1H), 7.48 – 7.41 (m, 2H), 7.32 (t, *J* = 7.8 Hz, 1H), 7.26 – 7.17 (m, 4H), 7.11 (d, *J* = 7.8 Hz, 1H), 6.93 (d, *J* = 7.7 Hz, 2H), 2.52 (d, *J* = 7.2 Hz, 2H), 1.96 – 1.86 (m, 1H), 0.93 (d, *J* = 6.6 Hz, 6H); <sup>13</sup>C NMR (100 MHz, CDCl<sub>3</sub>) δ 155.7, 150.1, 149.7, 144.2, 137.9, 135.0, 131.7, 129.7, 129.6, 128.7, 128.3, 127.0, 125.3, 125.2, 124.4, 118.8, 45.4, 30.1, 22.4; HRMS (ESI) *m/z* calcd for C<sub>24</sub>H<sub>23</sub>N<sub>2</sub>S<sup>+</sup> (M+H)<sup>+</sup> 371.1577, found 371.1578.

**(Z)-3-(4-Methoxyphenyl)-N-phenyl-2H-benzo[b][1,4]thiazin-2-imine (3d)**

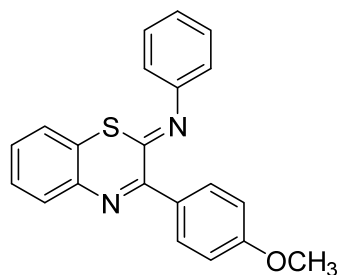

The reaction was conducted with 1-(4-methoxyphenyl)ethan-1-one (**1d**, 60 mg, 0.4 mmol), aniline (**2a**, 37 μL, 0.4 mmol) and S (25.6 mg, 0.8 mmol). The residue was purified by column chromatography on silica gel (petroleum ether/EtOAc: 50/1) to yield the desired product **3d** (31.0 mg, 45%) as yellow solid. mp: 127-128 °C.

<sup>1</sup>H NMR (400 MHz, CDCl<sub>3</sub>) δ 8.10 (d, *J* = 8.6 Hz, 2H), 7.72 (d, *J* = 7.9 Hz, 1H), 7.48 – 7.40 (m, 2H), 7.34 – 7.28 (m, 1H), 7.25 – 7.18 (m, 2H), 7.13 – 7.07 (m, 1H), 7.01 – 6.88 (m, 4H), 3.85 (s, 3H); <sup>13</sup>C NMR (100 MHz, CDCl<sub>3</sub>) δ 161.3, 154.8, 150.2, 149.6, 138.0, 131.6, 131.5, 129.9, 129.6, 128.1, 127.0, 125.3, 125.1, 124.2, 118.8, 113.3, 55.3; HRMS (ESI) *m/z* calcd for C<sub>21</sub>H<sub>17</sub>N<sub>2</sub>OS<sup>+</sup> (M+H)<sup>+</sup> 345.1056, found 345.1057.

**(Z)-3-(4-Fluorophenyl)-N-phenyl-2H-benzo[b][1,4]thiazin-2-imine (3e)**

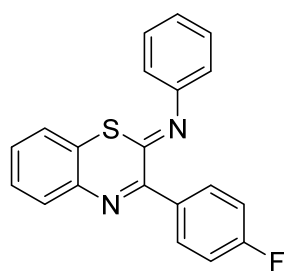

The reaction was conducted with 1-(4-fluorophenyl)ethan-1-one (**1e**, 49  $\mu$ L, 0.4 mmol), aniline (**2a**, 37  $\mu$ L, 0.4 mmol) and **S** (25.6 mg, 0.8 mmol). The residue was purified by column chromatography on silica gel (petroleum ether/EtOAc: 200/1) to yield the desired product **3e** (42.5 mg, 64%) as yellow solid. mp: 117-118  $^{\circ}$ C.

$^1\text{H}$  NMR (400 MHz,  $\text{CDCl}_3$ )  $\delta$  8.20 – 8.03 (m, 2H), 7.73 (d,  $J = 7.9$  Hz, 1H), 7.50 – 7.41 (m, 2H), 7.36 – 7.30 (m, 1H), 7.29 – 7.19 (m, 2H), 7.17 – 7.06 (m, 3H), 6.92 (d,  $J = 7.8$  Hz, 2H);  $^{13}\text{C}$  NMR (100 MHz,  $\text{CDCl}_3$ )  $\delta$  165.2, 162.7, 154.5, 150.1, 149.5, 137.7, 133.5 (d,  $J = 3.4$  Hz), 132.0 (d,  $J = 8.4$  Hz), 131.8, 129.7, 128.7, 127.2, 125.3 (d,  $J = 4.9$  Hz), 124.4, 118.7, 114.9 (d,  $J = 21.5$  Hz);  $^{19}\text{F}$  NMR (376 MHz,  $\text{CDCl}_3$ )  $\delta$  -110.5; HRMS (ESI)  $m/z$  calcd for  $\text{C}_{20}\text{H}_{14}\text{FN}_2\text{S}^+$  ( $\text{M}+\text{H}$ ) $^+$  333.0856, found 333.0858.

**(Z)-3-(4-Chlorophenyl)-N-phenyl-2H-benzo[b][1,4]thiazin-2-imine (3f)**

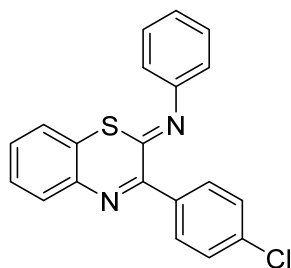

The reaction was conducted with 1-(4-chlorophenyl)ethan-1-one (**1f**, 54  $\mu$ L, 0.4 mmol), aniline (**2a**, 37  $\mu$ L, 0.4 mmol) and **S** (25.6 mg, 0.8 mmol). The residue was purified by column chromatography on silica gel (petroleum ether/EtOAc: 200/1) to yield the desired product **3f** (49.4 mg, 71%) as yellow solid. mp: 104-105  $^{\circ}$ C.

$^1\text{H}$  NMR (400 MHz,  $\text{CDCl}_3$ )  $\delta$  8.06 – 7.99 (m, 2H), 7.73 (dd,  $J = 7.9, 1.5$  Hz, 1H), 7.47 – 7.39 (m, 4H), 7.36 – 7.31 (m, 1H), 7.29 – 7.19 (m, 2H), 7.15 – 7.09 (m, 1H), 6.91 (d,  $J = 7.5$  Hz, 2H);  $^{13}\text{C}$  NMR (100 MHz,  $\text{CDCl}_3$ )  $\delta$  154.5, 149.9, 149.4, 137.6, 136.2, 135.9, 131.9, 131.3, 129.7, 128.8, 128.1, 127.2, 125.4(1), 125.3 (7), 124.5, 118.8; HRMS (ESI)  $m/z$  calcd for  $\text{C}_{20}\text{H}_{14}\text{ClN}_2\text{S}^+$  ( $\text{M}+\text{H}$ ) $^+$  349.0561, found 349.0560.

**(Z)-3-(4-Bromophenyl)-N-phenyl-2H-benzo[b][1,4]thiazin-2-imine (3g)**

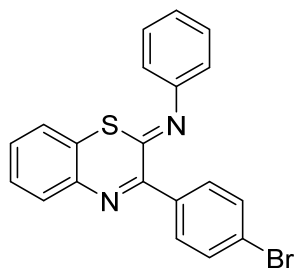

The reaction was conducted with 1-(4-bromophenyl)ethan-1-one (**1g**, 82 mg, 0.4 mmol), aniline (**2a**, 37  $\mu$ L, 0.4 mmol) and S (25.6 mg, 0.8 mmol). The residue was purified by column chromatography on silica gel (petroleum ether/EtOAc: 200/1) to yield the desired product **3g** (50.9 mg, 65%) as yellow solid. mp: 116-117  $^{\circ}$ C.

$^1\text{H}$  NMR (400 MHz,  $\text{CDCl}_3$ )  $\delta$  7.96 (d,  $J = 8.2$  Hz, 2H), 7.73 (d,  $J = 7.9$  Hz, 1H), 7.57 (d,  $J = 8.1$  Hz, 2H), 7.49 – 7.39 (m, 2H), 7.37 – 7.31 (m, 1H), 7.30 – 7.19 (m, 2H), 7.12 (d,  $J = 7.8$  Hz, 1H), 6.91 (d,  $J = 7.8$  Hz, 2H);  $^{13}\text{C}$  NMR (100 MHz,  $\text{CDCl}_3$ )  $\delta$  154.6, 149.9, 149.4, 137.6, 136.4, 131.9, 131.5, 131.1, 129.7, 128.8, 127.2, 125.4(0), 125.3 (6), 124.6, 124.4, 118.8; HRMS (ESI)  $m/z$  calcd for  $\text{C}_{20}\text{H}_{14}\text{BrN}_2\text{S}^+$  ( $\text{M}+\text{H}$ ) $^+$  393.0056, found 393.0057.

**(Z)-3-(4-Nitrophenyl)-N-phenyl-2H-benzo[b][1,4]thiazin-2-imine (3h)**

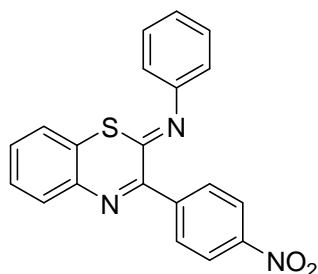

The reaction was conducted with 1-(4-nitrophenyl)ethan-1-one (**1h**, 68 mg, 0.4 mmol), aniline (**2a**, 37  $\mu$ L, 0.4 mmol) and S (25.6 mg, 0.8 mmol). The residue was purified by column chromatography on silica gel (petroleum ether/EtOAc: 50/1) to yield the desired product **3h** (41.7 mg, 58%) as orange solid. mp: 192-193  $^{\circ}$ C.

$^1\text{H}$  NMR (400 MHz,  $\text{CDCl}_3$ )  $\delta$  8.35 – 8.16 (m, 4H), 7.81 – 7.72 (m, 1H), 7.51 – 7.43 (m, 2H), 7.41 – 7.31 (m, 2H), 7.25 (d,  $J = 10.6$  Hz, 1H), 7.19 – 7.13 (m, 1H), 6.93 (d,  $J = 7.6$  Hz, 2H);  $^{13}\text{C}$  NMR (100 MHz,  $\text{CDCl}_3$ )  $\delta$  153.8, 149.6, 149.0, 148.4, 143.8, 137.4, 132.3, 130.9, 129.8, 129.6, 127.4, 125.6, 125.6, 124.7, 123.0, 118.7; HRMS (ESI)  $m/z$  calcd for  $\text{C}_{20}\text{H}_{14}\text{N}_3\text{O}_2\text{S}^+$  ( $\text{M}+\text{H}$ ) $^+$  360.0801, found 360.0797.

**(Z)-4-(2-(Phenylimino)-2H-benzo[b][1,4]thiazin-3-yl)benzotrile (3i)**

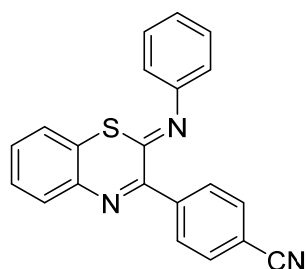

The reaction was conducted with 4-acetylbenzotrile (**1i**, 59 mg, 0.4 mmol), aniline (**2a**, 37  $\mu$ L, 0.4 mmol) and S (25.6 mg, 0.8 mmol). The residue was purified by column chromatography on silica gel (petroleum ether/EtOAc: 20/1) to yield the desired product **3i** (42.7 mg, 63%) as yellow solid. mp: 147-148  $^{\circ}$ C.

$^1\text{H}$  NMR (400 MHz,  $\text{CDCl}_3$ )  $\delta$  8.16 (d,  $J = 8.3$  Hz, 2H), 7.77 – 7.70 (m, 3H), 7.48 – 7.42 (m, 2H), 7.38 – 7.28 (m, 2H), 7.26 – 7.20 (m, 1H), 7.14 (d,  $J = 7.7$  Hz, 1H), 6.91 (d,  $J = 7.5$  Hz, 2H);  $^{13}\text{C}$  NMR (100 MHz,  $\text{CDCl}_3$ )  $\delta$  153.9, 149.6, 149.1, 142.0, 137.4, 132.2, 131.6, 130.5, 129.7, 129.4, 127.4, 125.6, 125.5, 124.6, 118.7, 113.2; HRMS (ESI)  $m/z$  calcd for  $\text{C}_{21}\text{H}_{14}\text{N}_3\text{S}^+$  ( $\text{M}+\text{H}$ ) $^+$  340.0902(9), found 340.0903(3).

**(Z)-N-Phenyl-3-(4-(trifluoromethoxy)phenyl)-2H-benzo[b][1,4]thiazin-2-imine (3j)**

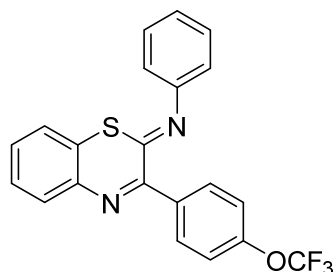

The reaction was conducted with 1-(4-(trifluoromethoxy)phenyl)ethan-1-one (**1j**, 65  $\mu$ L, 0.4 mmol), aniline (**2a**, 37  $\mu$ L, 0.4 mmol) and S (25.6 mg, 0.8 mmol). The residue was purified by column chromatography on silica gel (petroleum ether/EtOAc: 200/1) to yield the desired product **3j** (56.5 mg, 71%) as yellow solid. mp: 103-104  $^{\circ}$ C.

$^1\text{H}$  NMR (400 MHz,  $\text{CDCl}_3$ )  $\delta$  8.13 (d,  $J = 8.7$  Hz, 2H), 7.74 (d,  $J = 7.9$  Hz, 1H), 7.48 – 7.42 (m, 2H), 7.37 – 7.19 (m, 5H), 7.15 – 7.10 (m, 1H), 6.97 – 6.87 (m, 2H);  $^{13}\text{C}$  NMR (100 MHz,  $\text{CDCl}_3$ )  $\delta$  154.3, 150.4, 150.0, 149.4, 137.6, 136.0, 131.9, 131.6, 129.7, 128.9, 127.2, 125.4, 124.5, 120.1, 118.7;  $^{19}\text{F}$  NMR (376 MHz,  $\text{CDCl}_3$ )  $\delta$  -57.5; HRMS (ESI)  $m/z$  calcd for  $\text{C}_{21}\text{H}_{14}\text{F}_3\text{N}_2\text{OS}^+$  ( $\text{M}+\text{H}$ ) $^+$  399.0773, found 399.0775.

**(Z)-N-Phenyl-3-(m-tolyl)-2H-benzo[b][1,4]thiazin-2-imine (3k)**

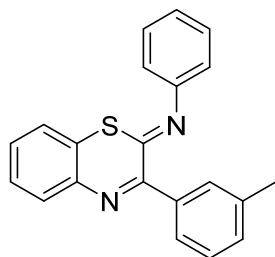

The reaction was conducted with 1-(m-tolyl)ethan-1-one (**1k**, 54  $\mu\text{L}$ , 0.4 mmol), aniline (**2a**, 37  $\mu\text{L}$ , 0.4 mmol) and  $\text{S}_8$  (25.6 mg, 0.8 mmol). The residue was purified by column chromatography on silica gel (petroleum ether/EtOAc: 200/1) to yield the desired product **3k** (39.4 mg, 60%) as orange solid. mp: 140-141  $^\circ\text{C}$ .

$^1\text{H}$  NMR (400 MHz,  $\text{CDCl}_3$ )  $\delta$  7.87 – 7.79 (m, 2H), 7.75 (dd,  $J = 7.9, 1.5$  Hz, 1H), 7.46 – 7.41 (m, 2H), 7.35 – 7.30 (m, 2H), 7.28 – 7.18 (m, 3H), 7.11 (d,  $J = 7.5$  Hz, 1H), 6.97 – 6.88 (m, 2H), 2.43 (s, 3H);  $^{13}\text{C}$  NMR (100 MHz,  $\text{CDCl}_3$ )  $\delta$  156.2, 150.1, 149.7, 137.8, 137.6, 137.6, 131.8, 130.9, 130.2, 129.6, 128.5, 127.7, 127.1, 127.0, 125.4, 125.2, 124.4, 118.8, 21.5; HRMS (ESI)  $m/z$  calcd for  $\text{C}_{21}\text{H}_{17}\text{N}_2\text{S}^+$  ( $\text{M}+\text{H}$ ) $^+$  329.1107, found 329.1111.

**(Z)-3-(3-Methoxyphenyl)-N-phenyl-2H-benzo[b][1,4]thiazin-2-imine (3l)**

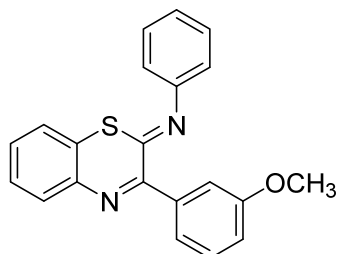

The reaction was conducted with 1-(3-methoxyphenyl)ethan-1-one (**1l**, 56  $\mu\text{L}$ , 0.4 mmol), aniline (**2a**, 37  $\mu\text{L}$ , 0.4 mmol) and  $\text{S}_8$  (25.6 mg, 0.8 mmol). The residue was purified by column chromatography on silica gel (petroleum ether/EtOAc: 5/1) to yield the desired product **3l** (37.9 mg, 55%) as orange liquid.

$^1\text{H}$  NMR (400 MHz,  $\text{CDCl}_3$ )  $\delta$  7.75 (dd,  $J = 7.9, 1.5$  Hz, 1H), 7.66 – 7.60 (m, 2H), 7.46 – 7.42 (m, 2H), 7.38 – 7.31 (m, 2H), 7.26 – 7.18 (m, 2H), 7.12 (dd,  $J = 7.8, 1.5$  Hz, 1H), 7.01 (dd,  $J = 8.2, 2.4$  Hz, 1H), 6.95 – 6.89 (m, 2H), 3.87 (s, 3H);  $^{13}\text{C}$  NMR (100 MHz,  $\text{CDCl}_3$ )  $\delta$  159.2, 155.6, 150.0, 149.6, 138.9, 137.8, 131.8, 129.6, 128.9, 128.6, 127.1, 125.4, 125.2, 124.5, 122.4, 118.8, 115.9, 115.3, 55.3; HRMS (ESI)  $m/z$  calcd. for  $\text{C}_{21}\text{H}_{17}\text{N}_2\text{OS}^+$  ( $\text{M}+\text{H}$ ) $^+$  345.1056, found 345.1050.



**(Z)-3-(3-Chlorophenyl)-N-phenyl-2H-benzo[b][1,4]thiazin-2-imine (3m)**

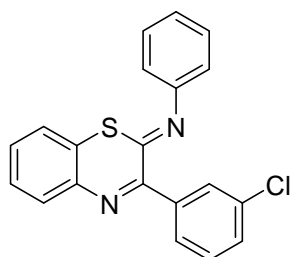

The reaction was conducted with 1-(3-chlorophenyl)ethan-1-one (**1m**, 53  $\mu$ L, 0.4 mmol), aniline (**2a**, 37  $\mu$ L, 0.4 mmol) and S (25.6 mg, 0.8 mmol). The residue was purified by column chromatography on silica gel (petroleum ether/EtOAc: 200/1) to yield the desired product **3m** (49.4 mg, 71%) as orange solid. mp: 92-93  $^{\circ}$ C.

$^1\text{H}$  NMR (400 MHz,  $\text{CDCl}_3$ )  $\delta$  8.08 – 8.00 (m, 1H), 7.98 – 7.93 (m, 1H), 7.75 (dd, 1H), 7.48 – 7.41 (m, 3H), 7.40 – 7.32 (m, 2H), 7.32 – 7.26 (m, 1H), 7.25 – 7.20 (m, 1H), 7.16 – 7.11 (m, 1H), 6.98 – 6.87 (m, 2H);  $^{13}\text{C}$  NMR (100 MHz,  $\text{CDCl}_3$ )  $\delta$  154.4, 149.7, 149.4, 139.3, 137.6, 133.9, 132.0, 130.0, 129.9, 129.7, 129.0(3), 128.9 (7), 128.1, 127.2, 125.4 (3), 125.3 (8), 124.6, 118.8; HRMS (ESI)  $m/z$  calcd for  $\text{C}_{20}\text{H}_{14}\text{ClN}_2\text{S}^+$  ( $\text{M}+\text{H}$ ) $^+$  349.0561, found 349.0564.

**(Z)-3-(3-Bromophenyl)-N-phenyl-2H-benzo[b][1,4]thiazin-2-imine (3n)**

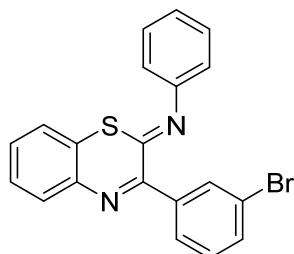

The reaction was conducted with 1-(3-bromophenyl)ethan-1-one (**1n**, 54  $\mu$ L, 0.4 mmol), aniline (**2a**, 37  $\mu$ L, 0.4 mmol) and S (25.6 mg, 0.8 mmol). The residue was purified by column chromatography on silica gel (petroleum ether/EtOAc: 200/1) to yield the desired product **3n** (43.1 mg, 55%) as yellow solid. mp: 99-100  $^{\circ}$ C.

$^1\text{H}$  NMR (400 MHz,  $\text{CDCl}_3$ )  $\delta$  8.22 – 8.17 (m, 1H), 8.01 – 7.98 (m, 1H), 7.75 (dd,  $J = 7.8, 1.5$  Hz, 1H), 7.59 – 7.56 (m, 1H), 7.47 – 7.43 (m, 2H), 7.37 – 7.28 (m, 3H), 7.24 – 7.19 (m, 1H), 7.13 (dd,  $J = 7.8, 1.5$  Hz, 1H), 6.95 – 6.90 (m, 2H);  $^{13}\text{C}$  NMR (100 MHz,  $\text{CDCl}_3$ )  $\delta$  154.2, 149.7, 149.4, 139.6, 137.5, 132.9, 132.7, 132.0, 129.7, 129.3, 129.0, 128.6, 127.2, 125.4, 125.4, 124.5, 122.0, 118.8; HRMS (ESI)  $m/z$  calcd for  $\text{C}_{20}\text{H}_{14}\text{BrN}_2\text{S}^+$  ( $\text{M}+\text{H}$ ) $^+$  393.0056, found 393.0060.

**(Z)-N-Phenyl-3-(3-(trifluoromethyl)phenyl)-2H-benzo[b][1,4]thiazin-2-imine (3o)**

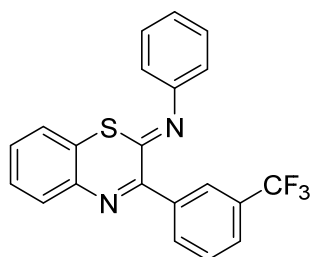

The reaction was conducted with 1-(3-(trifluoromethyl)phenyl)ethan-1-one (**1o**, 62  $\mu$ L, 0.4 mmol), aniline (**2a**, 37  $\mu$ L, 0.4 mmol) and S (25.6 mg, 0.8 mmol). The residue was purified by column chromatography on silica gel (petroleum ether/EtOAc: 200/1) to yield the desired product **3o** (48.9 mg, 64%) as yellow solid. mp: 127-128  $^{\circ}$ C.

$^1\text{H}$  NMR (400 MHz, Chloroform-*d*)  $\delta$  8.33 (s, 1H), 8.26 (d,  $J$  = 7.8 Hz, 1H), 7.77 (dd,  $J$  = 7.8, 1.5 Hz, 1H), 7.70 (d,  $J$  = 7.8 Hz, 1H), 7.55 (t,  $J$  = 7.8 Hz, 1H), 7.45 (t,  $J$  = 7.9 Hz, 2H), 7.36 (td,  $J$  = 7.6, 1.5 Hz, 1H), 7.30 (td,  $J$  = 7.5, 1.5 Hz, 1H), 7.22 (t,  $J$  = 7.5 Hz, 1H), 7.14 (dd,  $J$  = 7.8, 1.5 Hz, 1H), 6.93 (d,  $J$  = 7.2 Hz, 2H);  $^{13}\text{C}$  NMR (100 MHz,  $\text{CDCl}_3$ )  $\delta$  154.3, 149.7, 149.3, 138.3, 137.5, 133.2, 132.1, 130.4 (q,  $J$  = 31.8 Hz), 129.7, 129.1, 128.2, 127.3, 126.9 (q,  $J$  = 7.8 Hz), 126.5 (q,  $J$  = 7.5 Hz), 125.5, 125.4, 124.6, 124.0 (q,  $J$  = 272 Hz), 118.8;  $^{19}\text{F}$  NMR (376 MHz,  $\text{CDCl}_3$ )  $\delta$  -62.5; HRMS (ESI)  $m/z$  calcd for  $\text{C}_{21}\text{H}_{14}\text{F}_3\text{N}_2\text{S}^+$  ( $\text{M}+\text{H}$ ) $^+$  383.0824, found 383.0823.

**(Z)-N-Phenyl-3-(o-tolyl)-2H-benzo[b][1,4]thiazin-2-imine (3p)**

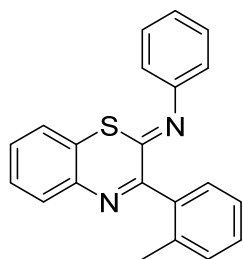

The reaction was conducted with 1-(o-tolyl)ethan-1-one (**1p**, 53  $\mu$ L, 0.4 mmol), aniline (**2a**, 37  $\mu$ L, 0.4 mmol) and S (25.6 mg, 0.8 mmol). The residue was purified by column chromatography on silica gel (petroleum ether/EtOAc: 100/1) to yield the desired product **3p** (29.5 mg, 45%) as orange liquid.

$^1\text{H}$  NMR (400 MHz,  $\text{CDCl}_3$ )  $\delta$  7.74 (d,  $J$  = 7.6 Hz, 1H), 7.50 (d,  $J$  = 7.0 Hz, 1H), 7.42 – 7.25 (m, 7H), 7.19 – 7.13 (m, 2H), 6.89 – 6.80 (m, 2H), 2.44 (s, 3H);  $^{13}\text{C}$  NMR (100 MHz,  $\text{CDCl}_3$ )  $\delta$  159.0, 150.5, 150.0, 138.6, 137.5, 135.8, 132.0, 130.3, 129.6, 129.0, 128.9, 128.8, 127.2, 125.8, 125.6,

125.1, 124.4, 118.5, 20.2; HRMS (ESI)  $m/z$  calcd for  $C_{21}H_{17}N_2S^+$  ( $M+H$ ) $^+$  329.1107, found 329.1109.

**(Z)-3-(2-Chlorophenyl)-N-phenyl-2H-benzo[b][1,4]thiazin-2-imine (3q)**

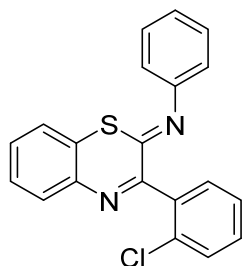

The reaction was conducted with 1-(2-chlorophenyl)ethan-1-one (**1q**, 53  $\mu$ L, 0.4 mmol), aniline (**2a**, 37  $\mu$ L, 0.4 mmol) and S (25.6 mg, 0.8 mmol). The residue was purified by column chromatography on silica gel (petroleum ether/EtOAc: 200/1) to yield the desired product **3q** (29.3 mg, 42%) as orange liquid.

$^1H$  NMR (400 MHz,  $CDCl_3$ )  $\delta$  7.74 (d,  $J = 7.7$  Hz, 1H), 7.60 (d,  $J = 7.3$  Hz, 1H), 7.46 – 7.24 (m, 7H), 7.20 – 7.13 (m, 2H), 6.88 (d,  $J = 7.8$  Hz, 2H);  $^{13}C$  NMR (100 MHz,  $CDCl_3$ )  $\delta$  157.0, 149.8, 149.7, 138.3, 137.6, 132.5, 132.1, 130.5, 130.1, 129.6, 129.5, 129.1, 127.2, 127.0, 125.7, 125.2, 124.7, 118.6; HRMS (ESI)  $m/z$  calcd for  $C_{20}H_{14}ClN_2S^+$  ( $M+H$ ) $^+$  349.0561, found 349.0563.

**(Z)-N-Phenyl-3-(thiophen-2-yl)-2H-benzo[b][1,4]thiazin-2-imine (3r)**

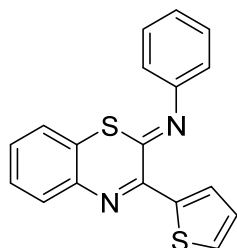

The reaction was conducted with 1-(thiophen-2-yl)ethan-1-one (**1r**, 44  $\mu$ L, 0.4 mmol), aniline (**2a**, 37  $\mu$ L, 0.4 mmol) and S (25.6 mg, 0.8 mmol). The residue was purified by column chromatography on silica gel (petroleum ether/EtOAc: 200/1) to yield the desired product **3r** (14.8 mg, 23%) as yellow solid. mp: 165-166  $^{\circ}C$ .

$^1H$  NMR (400 MHz,  $CDCl_3$ )  $\delta$  8.41 (d,  $J = 3.8$  Hz, 1H), 7.77 – 7.69 (m, 1H), 7.57 – 7.52 (m, 1H), 7.51 – 7.44 (m, 2H), 7.37 – 7.31 (m, 1H), 7.26 – 7.22 (m, 2H), 7.16 – 7.08 (m, 2H), 7.01 (d,  $J = 7.6$  Hz, 2H);  $^{13}C$  NMR (100 MHz,  $CDCl_3$ )  $\delta$  149.0, 148.5, 147.9, 140.4, 137.5, 132.7, 132.3, 131.5,

129.7, 128.1, 127.4, 127.1, 125.3, 125.2, 123.6, 119.0; HRMS (ESI)  $m/z$  calcd for  $C_{18}H_{13}N_2S_2^+$  (M+H)<sup>+</sup> 321.0515, found 321.0518.

**(Z)-N-Phenyl-3-(thiophen-3-yl)-2H-benzo[b][1,4]thiazin-2-imine (3s)**

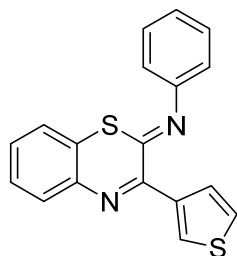

The reaction was conducted with 1-(thiophen-3-yl)ethan-1-one (**1s**, 52  $\mu$ L, 0.4 mmol), aniline (**2a**, 37  $\mu$ L, 0.4 mmol) and S (25.6 mg, 0.8 mmol). The residue was purified by column chromatography on silica gel (petroleum ether/EtOAc: 200/1) to yield the desired product **3s** (15.4 mg, 24%) as yellow solid. mp: 146-147 °C.

<sup>1</sup>H NMR (400 MHz, CDCl<sub>3</sub>)  $\delta$  8.69 – 8.54 (m, 1H), 8.05 – 7.99 (m, 1H), 7.75 – 7.68 (m, 1H), 7.50 – 7.43 (m, 2H), 7.36 – 7.29 (m, 2H), 7.27 – 7.19 (m, 2H), 7.11 (d,  $J$  = 7.7 Hz, 1H), 6.95 (d,  $J$  = 8.3 Hz, 2H); <sup>13</sup>C NMR (100 MHz, CDCl<sub>3</sub>)  $\delta$  149.8, 149.5, 149.0, 138.6, 137.7, 131.6, 131.1, 129.7, 129.5, 128.3, 127.0, 125.2, 125.2, 124.2, 124.1, 118.8; HRMS (ESI)  $m/z$  calcd for  $C_{18}H_{13}N_2S_2^+$  (M+H)<sup>+</sup> 321.0515, found 321.0509.

**(Z)-N-Phenyl-3-(pyridin-3-yl)-2H-benzo[b][1,4]thiazin-2-imine (3t)**

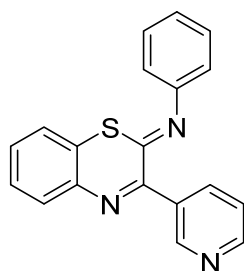

The reaction was conducted with 1-(pyridin-3-yl)ethan-1-one (**1t**, 44  $\mu$ L, 0.4 mmol), aniline (**2a**, 37  $\mu$ L, 0.4 mmol) and S (25.6 mg, 0.8 mmol). The residue was purified by column chromatography on silica gel (petroleum ether/EtOAc: 5/1) to yield the desired product **3t** (20.8 mg, 33%) as yellow solid. mp: 107-108 °C.

<sup>1</sup>H NMR (400 MHz, CDCl<sub>3</sub>)  $\delta$  9.37 – 9.20 (m, 1H), 8.66 (d,  $J$  = 4.6 Hz, 1H), 8.38 (d,  $J$  = 8.0 Hz, 1H), 7.76 (d,  $J$  = 7.9 Hz, 1H), 7.47 – 7.42 (m, 2H), 7.38 – 7.19 (m, 4H), 7.13 (d,  $J$  = 7.8 Hz, 1H),

6.93 (d,  $J = 7.8$  Hz, 2H);  $^{13}\text{C}$  NMR (100 MHz,  $\text{CDCl}_3$ )  $\delta$  153.4, 150.8, 150.4, 149.7, 149.2, 137.5, 137.3, 133.4, 132.1, 129.7, 129.1, 127.3, 125.5, 125.4, 124.4, 122.5, 118.7; HRMS (ESI)  $m/z$  calcd for  $\text{C}_{19}\text{H}_{14}\text{N}_3\text{S}^+$  ( $\text{M}+\text{H}$ ) $^+$  316.0903, found 316.0905.

**(Z)-N-Phenyl-3-(pyridin-4-yl)-2H-benzo[b][1,4]thiazin-2-imine (3u)**

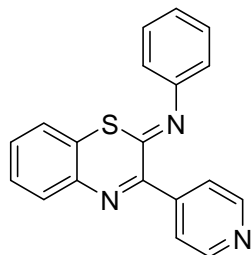

The reaction was conducted with 1-(pyridin-4-yl)ethan-1-one (**1u**, 45  $\mu\text{L}$ , 0.4 mmol), aniline (**2a**, 37  $\mu\text{L}$ , 0.4 mmol) and **S** (25.6 mg, 0.8 mmol). The residue was purified by column chromatography on silica gel (petroleum ether/EtOAc: 5/1) to yield the desired product **3u** (18.9 mg, 30%) as yellow solid. mp: 48-49  $^\circ\text{C}$ .

$^1\text{H}$  NMR (400 MHz,  $\text{CDCl}_3$ )  $\delta$  8.72 (d,  $J = 5.8$  Hz, 2H), 7.93 (d,  $J = 5.9$  Hz, 2H), 7.77 (d,  $J = 7.8$  Hz, 1H), 7.51 – 7.42 (m, 2H), 7.40 – 7.29 (m, 2H), 7.27 – 7.20 (m, 1H), 7.15 (d,  $J = 7.6$  Hz, 1H), 6.93 (d,  $J = 8.0$  Hz, 2H);  $^{13}\text{C}$  NMR (100 MHz,  $\text{CDCl}_3$ )  $\delta$  153.6, 149.6, 149.2, 149.1, 147.8, 145.1, 137.3, 132.3, 129.7, 129.5, 127.4, 125.6, 124.7, 123.9, 118.7; HRMS (ESI)  $m/z$  calcd for  $\text{C}_{19}\text{H}_{14}\text{N}_3\text{S}^+$  ( $\text{M}+\text{H}$ ) $^+$  316.0903, found 316.0904.

**(Z)-3-(Naphthalen-1-yl)-N-phenyl-2H-benzo[b][1,4]thiazin-2-imine (3v)**

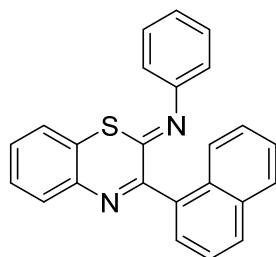

The reaction was conducted with 1-(naphthalen-1-yl)ethan-1-one (**1v**, 63  $\mu\text{L}$ , 0.4 mmol), aniline (**2a**, 37  $\mu\text{L}$ , 0.4 mmol) and **S** (25.6 mg, 0.8 mmol). The residue was purified by column chromatography on silica gel (petroleum ether/EtOAc: 200/1) to yield the desired product **3v** (16.0 mg, 22%) as yellow solid. mp: 154-155  $^\circ\text{C}$ .

$^1\text{H}$  NMR (400 MHz,  $\text{CDCl}_3$ )  $\delta$  8.01 (d,  $J = 7.4$  Hz, 1H), 7.92 – 7.86 (m, 2H), 7.80 – 7.72 (m, 2H), 7.59 – 7.54 (m, 1H), 7.51 – 7.46 (m, 2H), 7.38 – 7.29 (m, 4H), 7.21 – 7.17 (m, 1H), 7.14 – 7.10 (m, 1H), 6.78 (d,  $J = 7.8$  Hz, 2H);  $^{13}\text{C}$  NMR (100 MHz,  $\text{CDCl}_3$ )  $\delta$  158.2, 150.7, 149.8, 137.6, 136.4, 133.7, 132.1, 131.2, 129.5, 129.5, 129.0, 128.5, 127.2, 127.0, 126.2, 125.8, 125.7, 125.5, 125.2, 125.1, 124.5, 118.4; HRMS (ESI)  $m/z$  calcd for  $\text{C}_{24}\text{H}_{17}\text{N}_2\text{S}^+$  ( $\text{M}+\text{H}$ ) $^+$  365.1107, found 365.1108.

**(Z)-3-(Naphthalen-2-yl)-N-phenyl-2H-benzo[b][1,4]thiazin-2-imine (3w)**

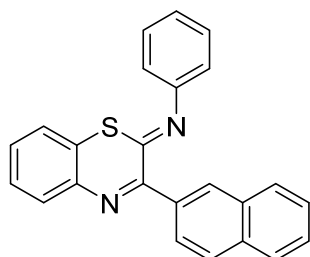

The reaction was conducted with 1-(naphthalen-2-yl)ethan-1-one (**1w**, 69 mg, 0.4 mmol), aniline (**2a**, 37  $\mu\text{L}$ , 0.4 mmol) and S (25.6 mg, 0.8 mmol). The residue was purified by column chromatography on silica gel (petroleum ether/EtOAc: 200/1) to yield the desired product **3w** (19.7 mg, 27%) as yellow solid. mp: 175-176  $^\circ\text{C}$ .

$^1\text{H}$  NMR (400 MHz,  $\text{CDCl}_3$ )  $\delta$  8.61 (s, 1H), 8.15 (dd,  $J = 8.6, 1.8$  Hz, 1H), 7.95 – 7.78 (m, 4H), 7.55 – 7.42 (m, 4H), 7.38 – 7.32 (m, 1H), 7.29 – 7.19 (m, 2H), 7.17 – 7.11 (m, 1H), 7.01 – 6.90 (m, 2H);  $^{13}\text{C}$  NMR (100 MHz,  $\text{CDCl}_3$ )  $\delta$  155.7, 150.1, 149.6, 137.9, 135.0, 134.2, 132.9, 131.8, 130.1, 129.6, 129.0, 128.6, 127.6, 127.3, 127.1, 127.0, 126.8, 126.1, 125.4, 125.3, 124.4, 118.9; HRMS (ESI)  $m/z$  calcd for  $\text{C}_{24}\text{H}_{17}\text{N}_2\text{S}^+$  ( $\text{M}+\text{H}$ ) $^+$  365.1107, found 365.1108.

**(Z)-3-(tert-Butyl)-N-phenyl-2H-benzo[b][1,4]thiazin-2-imine (3x)**

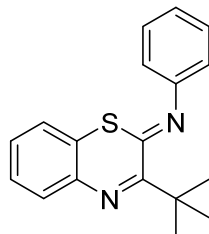

The reaction was conducted with 3,3-dimethylbutan-2-one (**1x**, 52  $\mu\text{L}$ , 0.4 mmol), aniline (**2a**, 37  $\mu\text{L}$ , 0.4 mmol) and S (25.6 mg, 0.8 mmol). The residue was purified by column chromatography on silica gel (petroleum ether/EtOAc: 200/1) to yield the desired product **3x** (10.0 mg, 17%) as

yellow solid. mp: 116-117 °C.

$^1\text{H}$  NMR (400 MHz,  $\text{CDCl}_3$ )  $\delta$  7.63 (d,  $J = 7.9$  Hz, 1H), 7.48 – 7.39 (m, 2H), 7.30 – 7.23 (m, 1H), 7.23 – 7.11 (m, 2H), 7.05 (d,  $J = 7.8$  Hz, 1H), 6.87 (d,  $J = 7.7$  Hz, 2H), 1.55 (s, 9H);  $^{13}\text{C}$  NMR (100 MHz,  $\text{CDCl}_3$ )  $\delta$  164.2, 149.4, 147.5, 137.3, 131.2, 129.6, 127.7, 126.6, 125.0, 124.8, 124.4, 118.7, 41.8, 29.2; HRMS (ESI)  $m/z$  calcd for  $\text{C}_{18}\text{H}_{19}\text{N}_2\text{S}^+$  ( $\text{M}+\text{H}$ ) $^+$  295.1264, found 295.1266.

**(Z)-7-Methyl-3-phenyl-N-(p-tolyl)-2H-benzo[b][1,4]thiazin-2-imine (4a)**

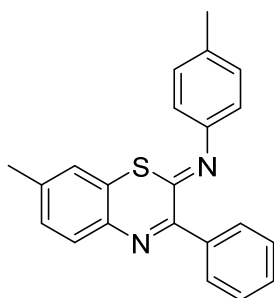

The reaction was conducted with acetophenone (**1a**, 47  $\mu\text{L}$ , 0.4 mmol), p-toluidine (**2b**, 43 mg, 0.4 mmol) and S (25.6 mg, 0.8 mmol). The residue was purified by column chromatography on silica gel (petroleum ether/EtOAc: 200/1) to yield the desired product **4a** (42.4 mg, 62%) as yellow solid. mp: 139-140 °C.

$^1\text{H}$  NMR (400 MHz,  $\text{CDCl}_3$ )  $\delta$  8.06 – 7.99 (m, 2H), 7.61 (d,  $J = 8.0$  Hz, 1H), 7.46 – 7.40 (m, 3H), 7.25 – 7.21 (m, 2H), 7.12 (dd,  $J = 8.2, 1.9$  Hz, 1H), 6.91 (d,  $J = 1.9$  Hz, 1H), 6.83 (d,  $J = 7.8$  Hz, 2H), 2.37 (s, 3H), 2.33 (s, 3H);  $^{13}\text{C}$  NMR (100 MHz,  $\text{CDCl}_3$ )  $\delta$  155.0, 149.8, 147.1, 139.0, 137.9, 135.8, 134.8, 131.5, 130.1, 129.8, 129.8, 128.1, 127.8, 125.5, 124.3, 118.8, 21.3, 21.1; HRMS (ESI)  $m/z$  calcd for  $\text{C}_{22}\text{H}_{19}\text{N}_2\text{S}^+$  ( $\text{M}+\text{H}$ ) $^+$  343.1264, found 343.1266.

**(Z)-7-Ethyl-N-(4-ethylphenyl)-3-phenyl-2H-benzo[b][1,4]thiazin-2-imine (4b)**

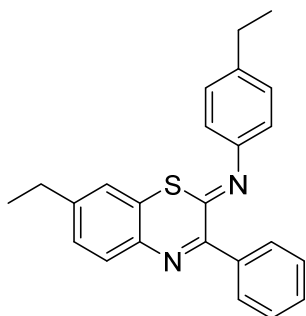

The reaction was conducted with acetophenone (**1a**, 47  $\mu\text{L}$ , 0.4 mmol), 4-ethylaniline (**2c**, 51  $\mu\text{L}$ ,

0.4 mmol) and S (25.6 mg, 0.8 mmol). The residue was purified by column chromatography on silica gel (petroleum ether/EtOAc: 200/1) to yield the desired product **4b** (45.9 mg, 62%) as orange solid. mp: 66-67 °C.

<sup>1</sup>H NMR (400 MHz, CDCl<sub>3</sub>) δ 8.08 – 7.98 (m, 2H), 7.64 (d, *J* = 8.2 Hz, 1H), 7.46 – 7.39 (m, 3H), 7.26 (d, *J* = 8.2 Hz, 2H), 7.14 (dd, *J* = 8.1, 1.9 Hz, 1H), 6.94 (d, *J* = 1.9 Hz, 1H), 6.86 (d, *J* = 8.3 Hz, 2H), 2.71 – 2.59 (m, 4H), 1.29 – 1.18 (m, 6H); <sup>13</sup>C NMR (100 MHz, CDCl<sub>3</sub>) δ 155.1, 149.8, 147.2, 145.3, 141.3, 137.9, 136.0, 131.6, 129.8, 128.9, 127.8, 127.0, 124.4, 124.3, 118.9, 28.5, 28.4, 15.5, 15.1; HRMS (ESI) *m/z* calcd for C<sub>24</sub>H<sub>23</sub>N<sub>2</sub>S<sup>+</sup> (M+H)<sup>+</sup> 371.1577, found 371.1580.

**(Z)-7-Isopropyl-N-(4-isopropylphenyl)-3-phenyl-2H-benzo[b][1,4]thiazin-2-imine (4c)**

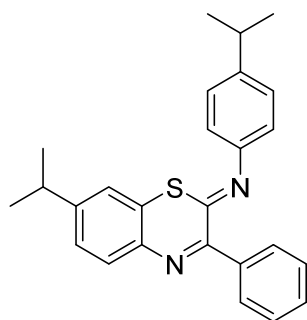

The reaction was conducted with acetophenone (**1a**, 47 μL, 0.4 mmol), 4-isopropylaniline (**2d**, 59 μL, 0.4 mmol) and S (25.6 mg, 0.8 mmol). The residue was purified by column chromatography on silica gel (petroleum ether/EtOAc: 200/1) to yield the desired product **4c** (54.9 mg, 69%) as orange liquid.

<sup>1</sup>H NMR (400 MHz, CDCl<sub>3</sub>) δ 8.08 – 8.00 (m, 2H), 7.65 (d, *J* = 8.2 Hz, 1H), 7.46 – 7.39 (m, 3H), 7.28 (d, *J* = 8.0 Hz, 2H), 7.18 (dd, *J* = 8.3, 1.9 Hz, 1H), 6.98 (d, *J* = 1.9 Hz, 1H), 6.87 (d, *J* = 8.1 Hz, 2H), 2.97 – 2.84 (m, 2H), 1.28 (d, *J* = 7.2 Hz, 6H), 1.22 (d, *J* = 6.8 Hz, 6H); <sup>13</sup>C NMR (100 MHz, CDCl<sub>3</sub>) δ 155.1, 149.8, 149.7, 147.3, 145.9, 137.9, 136.1, 131.6, 129.8, 129.8, 127.8, 127.4, 125.7, 124.3, 123.0, 118.9, 33.9, 33.7, 24.0, 23.7; HRMS (ESI) *m/z* calcd for C<sub>26</sub>H<sub>27</sub>N<sub>2</sub>S<sup>+</sup> (M+H)<sup>+</sup> 399.1890, found 399.1893.

**(Z)-7-Methoxy-N-(4-methoxyphenyl)-3-phenyl-2H-benzo[b][1,4]thiazin-2-imine (4d)**



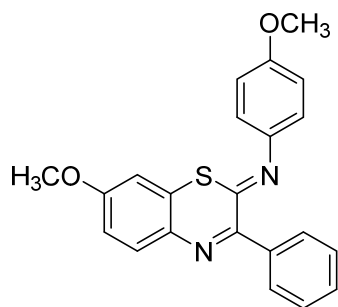

The reaction was conducted with acetophenone (**1a**, 47  $\mu$ L, 0.4 mmol), 4-methoxyaniline (**2e**, 50 mg, 0.4 mmol) and S (25.6 mg, 0.8 mmol). The residue was purified by column chromatography on silica gel (petroleum ether/EtOAc: 20/1) to yield the desired product **4d** (29.9 mg, 40%) as yellow solid. mp: 131-132  $^{\circ}$ C.

$^1\text{H}$  NMR (400 MHz,  $\text{CDCl}_3$ )  $\delta$  8.03 – 7.97 (m, 2H), 7.65 (d,  $J$  = 8.8 Hz, 1H), 7.45 – 7.40 (m, 3H), 6.99 – 6.94 (m, 2H), 6.93 – 6.85 (m, 3H), 6.63 (d,  $J$  = 2.7 Hz, 1H), 3.83 (s, 3H), 3.79 (s, 3H);  $^{13}\text{C}$  NMR (100 MHz,  $\text{CDCl}_3$ )  $\delta$  159.5, 157.3, 153.5, 149.2, 142.8, 138.1, 133.1, 132.1, 129.7, 129.6, 129.6, 127.8, 126.1, 120.6, 114.7, 113.9, 109.3, 55.6, 55.5; HRMS (ESI)  $m/z$  calcd for  $\text{C}_{22}\text{H}_{19}\text{N}_2\text{O}_2\text{S}^+$  ( $\text{M}+\text{H}$ ) $^+$  375.1162, found 375.1167.

**(Z)-7-Chloro-N-(4-chlorophenyl)-3-phenyl-2H-benzo[b][1,4]thiazin-2-imine (4e)**

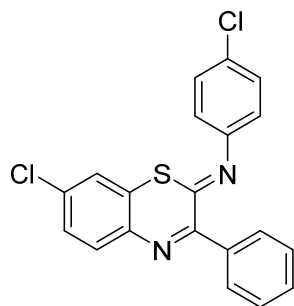

The reaction was conducted with acetophenone (**1a**, 47  $\mu$ L, 0.4 mmol), 4-chloroaniline (**2f**, 52 mg, 0.4 mmol) and S (25.6 mg, 0.8 mmol). The residue was purified by column chromatography on silica gel (petroleum ether/EtOAc: 200/1) to yield the desired product **4e** (26.0 mg, 34%) as yellow solid. mp: 158-159  $^{\circ}$ C.

$^1\text{H}$  NMR (400 MHz,  $\text{CDCl}_3$ )  $\delta$  8.06 – 7.95 (m, 2H), 7.66 (d,  $J$  = 8.5 Hz, 1H), 7.49 – 7.37 (m, 5H), 7.31 – 7.24 (m, 1H), 7.12 (s, 1H), 6.85 (d,  $J$  = 8.2 Hz, 2H);  $^{13}\text{C}$  NMR (100 MHz,  $\text{CDCl}_3$ )  $\delta$  155.7, 149.5, 147.7, 137.1, 136.3, 134.6, 132.8, 130.8, 130.3, 129.8, 129.8, 128.0, 127.6, 125.7, 124.9, 120.3; HRMS (ESI)  $m/z$  calcd for  $\text{C}_{20}\text{H}_{13}\text{Cl}_2\text{N}_2\text{S}^+$  ( $\text{M}+\text{H}$ ) $^+$  383.0171, found 383.0173.

**(Z)-7-Bromo-N-(4-bromophenyl)-3-phenyl-2H-benzo[b][1,4]thiazin-2-imine (4f)**

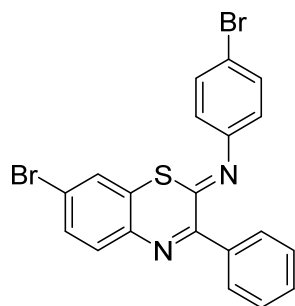

The reaction was conducted with acetophenone (**1a**, 47  $\mu\text{L}$ , 0.4 mmol), 4-bromoaniline (**2g**, 70 mg, 0.4 mmol) and S (25.6 mg, 0.8 mmol). The residue was purified by column chromatography on silica gel (petroleum ether/EtOAc: 200/1) to yield the desired product **4f** (32.9 mg, 35%) as yellow solid. mp: 154-155  $^{\circ}\text{C}$ .

$^1\text{H}$  NMR (400 MHz,  $\text{CDCl}_3$ )  $\delta$  8.07 – 7.95 (m, 2H), 7.64 – 7.52 (m, 3H), 7.51 – 7.40 (m, 3H), 7.31 – 7.24 (m, 2H), 6.85 – 6.74 (m, 2H);  $^{13}\text{C}$  NMR (100 MHz,  $\text{CDCl}_3$ )  $\delta$  155.8, 149.5, 148.2, 137.1, 136.7, 133.0, 132.8, 130.6, 130.4, 129.8, 128.0, 127.8, 125.9, 122.6, 120.6, 118.5; HRMS (ESI)  $m/z$  calcd for  $\text{C}_{20}\text{H}_{13}\text{Br}_2\text{N}_2\text{S}^+$  ( $\text{M}+\text{H}$ ) $^+$  470.9161, found 470.9163.

**(Z)-6-Methyl-3-phenyl-N-(m-tolyl)-2H-benzo[b][1,4]thiazin-2-imine (4g)**

**(Z)-8-Methyl-3-phenyl-N-(m-tolyl)-2H-benzo[b][1,4]thiazin-2-imine (4g')**

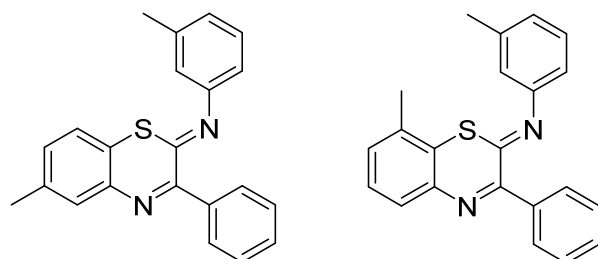

The reaction was conducted with acetophenone (**1a**, 47  $\mu\text{L}$ , 0.4 mmol), m-toluidine (**2h**, 44  $\mu\text{L}$ , 0.4 mmol) and S (25.6 mg, 0.8 mmol). The residue was purified by column chromatography on silica gel (petroleum ether/EtOAc: 200/1) to yield the desired product **4g+4g'** (51.3 mg, 75%) as orange solid. mp: 79-80  $^{\circ}\text{C}$ .

$^1\text{H}$  NMR (400 MHz,  $\text{CDCl}_3$ )  $\delta$  8.10 – 7.99 (m, 2H), 7.64 – 7.56 (m, 1H), 7.47 – 7.40 (m, 3H), 7.35 – 6.97 (m, 4H), 6.85 – 6.64 (m, 2H), 2.38 (s, 5H), 2.21 (s, 1H);  $^{13}\text{C}$  NMR (100 MHz,  $\text{CDCl}_3$ )  $\delta$  155.8, 155.3, 150.1, 149.7, 149.4, 139.6, 139.6, 137.8, 137.8, 137.7, 137.6, 137.0, 133.5, 132.1,

129.9, 129.8, 129.6, 129.4, 127.8, 126.3, 125.9, 125.8, 125.0, 123.8, 121.0, 119.4, 119.4, 115.6, 115.5, 21.5, 20.9, 18.8; HRMS (ESI)  $m/z$  calcd for  $C_{22}H_{19}N_2S^+$  ( $M+H$ ) $^+$  343.1264, found 343.1265.

**(Z)-6-(tert-Butyl)-N-(3-(tert-butyl)phenyl)-3-phenyl-2H-benzo[b][1,4]thiazin-2-imine (4h)**

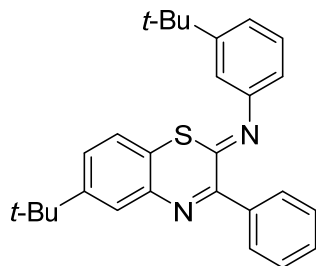

The reaction was conducted with acetophenone (**1a**, 47  $\mu$ L, 0.4 mmol), 3-(tert-butyl)aniline (**2i**, 65  $\mu$ L, 0.4 mmol) and S (25.6 mg, 0.8 mmol). The residue was purified by column chromatography on silica gel (petroleum ether/EtOAc: 200/1) to yield the desired product **4h** (61.3 mg, 72%) as yellow liquid.

$^1H$  NMR (400 MHz,  $CDCl_3$ )  $\delta$  8.09 – 8.00 (m, 2H), 7.77 (d,  $J$  = 2.1 Hz, 1H), 7.48 – 7.41 (m, 3H), 7.39 – 7.29 (m, 2H), 7.22 (d,  $J$  = 8.5 Hz, 1H), 7.07 (d,  $J$  = 8.3 Hz, 1H), 6.92 (s, 1H), 6.78 – 6.71 (m, 1H), 1.34 (d,  $J$  = 7.9 Hz, 18H);  $^{13}C$  NMR (100 MHz,  $CDCl_3$ )  $\delta$  156.0, 152.9, 150.6, 150.1, 149.5, 137.9, 137.5, 129.9, 129.8, 129.1, 128.7, 127.9, 126.1, 125.0, 122.1, 121.2, 116.2, 115.8, 34.9, 34.6, 31.3, 31.2; HRMS (ESI)  $m/z$  calcd for  $C_{28}H_{31}N_2S^+$  ( $M+H$ ) $^+$  427.2203, found 427.2207.

**(Z)-6-Chloro-N-(3-chlorophenyl)-3-phenyl-2H-benzo[b][1,4]thiazin-2-imine (4i)**

**(Z)-8-Chloro-N-(3-chlorophenyl)-3-phenyl-2H-benzo[b][1,4]thiazin-2-imine (4i')**

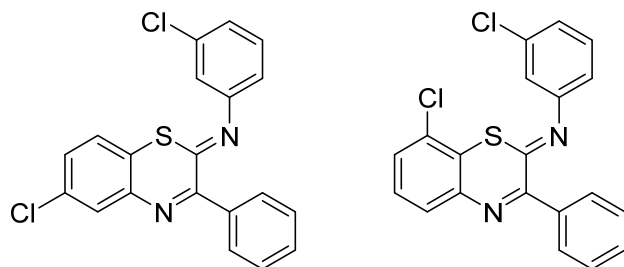

The reaction was conducted with acetophenone (**1a**, 47  $\mu$ L, 0.4 mmol), 3-chloroaniline (**2j**, 43  $\mu$ L, 0.4 mmol) and S (25.6 mg, 0.8 mmol). The residue was purified by column chromatography on silica gel (petroleum ether/EtOAc: 200/1) to yield the desired product **4i+4i'** (45.1 mg, 59%) as yellow solid. mp: 110-111  $^{\circ}C$ .

$^1\text{H}$  NMR (400 MHz,  $\text{CDCl}_3$ )  $\delta$  8.06 – 7.97 (m, 2H), 7.77 (d,  $J = 2.2$  Hz, 1H), 7.51 – 7.42 (m, 3H), 7.39 – 7.33 (m, 1H), 7.27 – 7.23 (m, 1H), 7.21 – 7.13 (m, 1H), 7.06 (d,  $J = 8.4$  Hz, 1H), 6.97 – 6.87 (m, 1H), 6.84 – 6.74 (m, 1H);  $^{13}\text{C}$  NMR (100 MHz,  $\text{CDCl}_3$ )  $\delta$  156.4, 150.4, 150.3, 138.5, 136.9, 135.3, 132.7, 131.4, 130.9, 130.5, 129.8, 128.7, 128.0, 126.2, 125.3, 122.4, 118.9, 116.9; HRMS (ESI)  $m/z$  calcd for  $\text{C}_{20}\text{H}_{13}\text{Cl}_2\text{N}_2\text{S}^+$  ( $\text{M}+\text{H}$ ) $^+$  383.0171, found 383.0173.

**(Z)-6-Bromo-N-(3-bromophenyl)-3-phenyl-2H-benzo[b][1,4]thiazin-2-imine (4j)**

**(Z)-8-Bromo-N-(3-bromophenyl)-3-phenyl-2H-benzo[b][1,4]thiazin-2-imine (4j')**

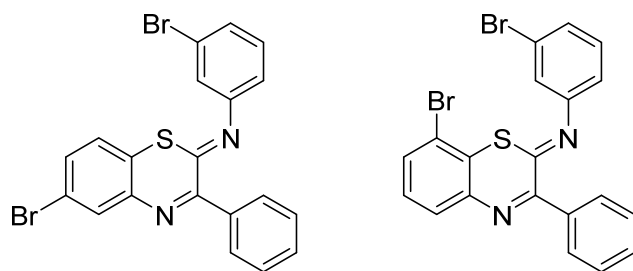

The reaction was conducted with acetophenone (**1a**, 47  $\mu\text{L}$ , 0.4 mmol), 3-bromoaniline (**2k**, 44  $\mu\text{L}$ , 0.4 mmol) and S (25.6 mg, 0.8 mmol). The residue was purified by column chromatography on silica gel (petroleum ether/EtOAc: 200/1) to yield the desired product **4j+4j'** (48.9 mg, 52%) as yellow solid. mp: 149-150  $^\circ\text{C}$ , 114-115  $^\circ\text{C}$ .

$^1\text{H}$  NMR (400 MHz,  $\text{CDCl}_3$ )  $\delta$  8.12 – 7.91 (m, 2H), 7.75 (dd,  $J = 8.0, 1.3$  Hz, 1H), 7.58 – 7.42 (m, 4H), 7.35 – 7.23 (m, 3H), 7.11 (s, 1H), 6.93 – 6.83 (m, 1H);  $^{13}\text{C}$  NMR (100 MHz,  $\text{CDCl}_3$ )  $\delta$  156.1, 151.6, 150.3, 139.5, 136.6, 132.3, 131.2, 131.0, 130.4, 129.9, 128.2, 128.0, 127.7, 125.6, 123.4, 121.8, 119.5, 117.1; HRMS (ESI)  $m/z$  calcd for  $\text{C}_{20}\text{H}_{13}\text{Br}_2\text{N}_2\text{S}^+$  ( $\text{M}+\text{H}$ ) $^+$  470.9161, found 470.9164.

$^1\text{H}$  NMR (400 MHz,  $\text{CDCl}_3$ )  $\delta$  8.05 – 7.97 (m, 2H), 7.93 (d,  $J = 2.1$  Hz, 1H), 7.49 – 7.38 (m, 4H), 7.35 – 7.28 (m, 2H), 7.08 (s, 1H), 7.02 (d,  $J = 8.4$  Hz, 1H), 6.88 – 6.80 (m, 1H);  $^{13}\text{C}$  NMR (100 MHz,  $\text{CDCl}_3$ )  $\delta$  156.4, 150.6, 150.3, 138.7, 136.9, 134.4, 131.5, 131.1, 130.5, 129.8, 128.2, 128.0, 126.4, 123.3, 123.1, 121.8, 120.2, 117.4; HRMS (ESI)  $m/z$  calcd for  $\text{C}_{20}\text{H}_{13}\text{Br}_2\text{N}_2\text{S}^+$  ( $\text{M}+\text{H}$ ) $^+$  470.9161, found 470.9165.

**(Z)-N-(2,3-Dimethylphenyl)-5,6-dimethyl-3-phenyl-2H-benzo[b][1,4]thiazin-2-imine (4k)**

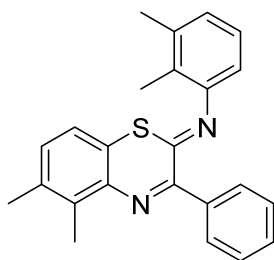

The reaction was conducted with acetophenone (**1a**, 47  $\mu\text{L}$ , 0.4 mmol), 2,3-dimethylaniline (**2l**, 50  $\mu\text{L}$ , 0.4 mmol) and S (25.6 mg, 0.8 mmol). The residue was purified by column chromatography on silica gel (petroleum ether/EtOAc: 200/1) to yield the desired product **4k** (17.0 mg, 23%) as yellow solid. mp: 137-138  $^{\circ}\text{C}$ .

$^1\text{H}$  NMR (400 MHz,  $\text{CDCl}_3$ )  $\delta$  8.22 – 8.09 (m, 2H), 7.50 – 7.39 (m, 3H), 7.17 – 7.12 (m, 1H), 7.08 – 6.99 (m, 2H), 6.86 (d,  $J = 8.0$  Hz, 1H), 6.65 (d,  $J = 7.8$  Hz, 1H), 2.61 (s, 3H), 2.32 (d,  $J = 5.7$  Hz, 6H), 2.04 (s, 3H);  $^{13}\text{C}$  NMR (100 MHz,  $\text{CDCl}_3$ )  $\delta$  153.4, 149.9, 148.8, 138.6, 138.3, 138.2, 135.9, 135.7, 130.0, 129.8, 127.8, 126.5, 126.3, 125.7, 122.1, 115.3, 20.3 (4), 20.2 (7), 14.0, 13.8; HRMS (ESI)  $m/z$  calcd for  $\text{C}_{24}\text{H}_{23}\text{N}_2\text{S}^+$  ( $\text{M}+\text{H}$ ) $^+$  371.1577, found 371.1579.

**(Z)-N-(2,4-Dimethylphenyl)-5,7-dimethyl-3-phenyl-2H-benzo[b][1,4]thiazin-2-imine (4l)**

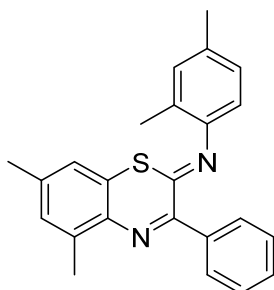

The reaction was conducted with acetophenone (**1a**, 47  $\mu\text{L}$ , 0.4 mmol), 2,4-dimethylaniline (**2m**, 51  $\mu\text{L}$ , 0.4 mmol) and S (25.6 mg, 0.8 mmol). The residue was purified by column chromatography on silica gel (petroleum ether/EtOAc: 200/1) to yield the desired product **4l** (16.3 mg, 22%) as yellow liquid.

$^1\text{H}$  NMR (400 MHz,  $\text{CDCl}_3$ )  $\delta$  8.14 (dd,  $J = 6.6, 3.0$  Hz, 2H), 7.48 – 7.39 (m, 3H), 7.14 – 6.96 (m, 3H), 6.81 – 6.55 (m, 2H), 2.61 (s, 3H), 2.34 (s, 3H), 2.29 (s, 3H), 2.12 (s, 3H);  $^{13}\text{C}$  NMR (100 MHz,  $\text{CDCl}_3$ )  $\delta$  152.6, 150.0, 146.3, 139.8, 138.7, 138.2, 134.5, 134.0, 131.8, 130.0, 129.7, 127.7,

127.4, 127.3, 124.9, 123.3, 117.4, 21.2, 21.0, 18.1, 17.7; HRMS (ESI)  $m/z$  calcd for  $C_{24}H_{23}N_2S^+$  ( $M+H$ )<sup>+</sup> 371.1577, found 371.1580.

**(Z)-3-phenyl-N-(p-tolyl)-2H-benzo[b][1,4]thiazin-2-imine (5a)**

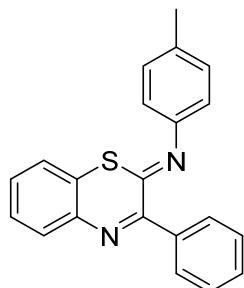

The reaction was conducted with acetophenone (**1a**, 47  $\mu$ L, 0.4 mmol), *p*-toluidine (**2b**, 22 mg, 0.2 mmol), 2-aminobenzenethiol (21  $\mu$ L, 0.2 mmol) and S (25.6 mg, 0.8 mmol). The residue was purified by column chromatography on silica gel (petroleum ether/EtOAc: 100/1) to yield the desired product **5a** (40.7 mg, 62%) as yellow liquid.

<sup>1</sup>H NMR (400 MHz, CDCl<sub>3</sub>)  $\delta$  8.10 – 8.01 (m, 2H), 7.78 – 7.73 (m, 1H), 7.48 – 7.41 (m, 3H), 7.35 – 7.31 (m, 1H), 7.29 – 7.22 (m, 3H), 7.13 (dd,  $J$  = 7.8, 1.5 Hz, 1H), 6.85 (d,  $J$  = 8.2 Hz, 2H), 2.39 (s, 3H); <sup>13</sup>C NMR (100 MHz, CDCl<sub>3</sub>)  $\delta$  156.0, 149.5, 147.0, 137.9, 137.7, 135.0, 131.7, 130.1, 130.0, 129.8, 128.5, 127.9, 127.0, 125.4, 124.5, 118.9, 21.1. HRMS (ESI)  $m/z$  calcd for  $C_{21}H_{17}N_2S^+$  ( $M+H$ )<sup>+</sup> 329.1104, found 329.1107.

## Crystal date and structure refinement for 4a

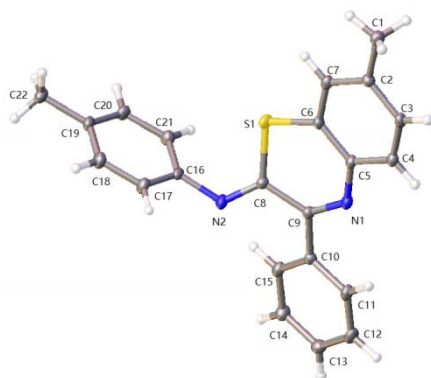

CCDC:1946031

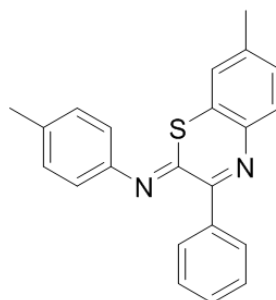

4a

**Table 1** Crystal date and structure refinement for 4a

Crystal data

Identification code

4a

Chemical formula

$C_{22}H_{18}N_2S$

$M_r$

342.44

Crystal system

Monoclinic,

Space group

$P2_1$

Temperature (K)

173

$a, b, c$  (Å)

9.768 (2), 5.0226 (10), 17.193 (3)

$\beta$  (°)

95.43 (3)

$V$  (Å<sup>3</sup>)

839.7 (3)

$Z$

2

$F(000)$

360

Density (calculated)

1.354 Mg/m<sup>3</sup>

Radiation type

Mo  $K\alpha$

$\mu$  (mm<sup>-1</sup>)

0.20

Crystal size (mm)

0.46 × 0.07 × 0.03

Theta range for data collection

2.5 to 27.5°

Data collection

Diffractometer

Saturn724+ CCD

Absorption correction

Multi-scan *CrystalClear* (Rigaku Inc.,

2007)

$T_{min}, T_{max}$

0.716, 1.000

No of measured reflections

6116

No of independent reflections

3658

No of observed [ $I > 2\sigma(I)$ ] reflections

3175

$R_{int}$

0.050

|                                                                         |                                                                                                                         |
|-------------------------------------------------------------------------|-------------------------------------------------------------------------------------------------------------------------|
| (sin $\theta/\lambda$ ) <sub>max</sub> (Å <sup>-1</sup> )               | 0.650                                                                                                                   |
| Index range                                                             | $h = -12 \rightarrow 12, k = -6 \rightarrow 6, l = -22 \rightarrow 22$                                                  |
| Refinement                                                              |                                                                                                                         |
| Refinement method                                                       | Full-matrix least-squares on F <sup>2</sup>                                                                             |
| $R[F^2 > 2\sigma(F^2)], wR(F^2), S$                                     | 0.070, 0.136, 1.13                                                                                                      |
| No of reflections                                                       | 3658                                                                                                                    |
| No of parameters                                                        | 228                                                                                                                     |
| No of restraints                                                        | 1                                                                                                                       |
| H-atom treatment                                                        | H-atom parameters constrained                                                                                           |
| $\Delta\rho_{\text{max}}, \Delta\rho_{\text{min}}$ (e Å <sup>-3</sup> ) | 0.25, -0.32                                                                                                             |
| Absolute structure                                                      | Flack x determined using 1022 quotients<br>[[I+)-(I-)]/[(I+)+(I-)] (Parsons and Flack<br>(2004), Acta Cryst. A60, s61). |
| Absolute structure parameter                                            | 0.02 (9)                                                                                                                |

**Table 2 Fractional atomic coordinates and isotropic or equivalent isotropic displacement parameters (Å<sup>2</sup>)**

|     | <i>x</i>     | <i>y</i>     | <i>z</i>    | <i>U</i> <sub>iso</sub> */ <i>U</i> <sub>eq</sub> |
|-----|--------------|--------------|-------------|---------------------------------------------------|
| S1  | 0.21314 (13) | 0.6567 (3)   | 0.22140 (7) | 0.0343 (3)                                        |
| N1  | 0.4432 (4)   | 0.8013 (9)   | 0.3543 (2)  | 0.0274 (9)                                        |
| N2  | 0.4087 (4)   | 0.8909 (9)   | 0.1469 (2)  | 0.0304 (10)                                       |
| C1  | 0.0753 (5)   | -0.0278 (11) | 0.4280 (3)  | 0.0321 (12)                                       |
| H1A | 0.1282       | -0.1826      | 0.4443      | 0.048*                                            |
| H1B | 0.0125       | -0.0713      | 0.3835      | 0.048*                                            |
| H1C | 0.0246       | 0.0314       | 0.4700      | 0.048*                                            |
| C2  | 0.1700 (5)   | 0.1891 (10)  | 0.4067 (3)  | 0.0266 (10)                                       |
| C3  | 0.2809 (5)   | 0.2695 (10)  | 0.4591 (3)  | 0.0294 (11)                                       |
| H3  | 0.2959       | 0.1858       | 0.5074      | 0.035*                                            |
| C4  | 0.3684 (5)   | 0.4707 (11)  | 0.4403 (3)  | 0.0293 (11)                                       |
| H4  | 0.4396       | 0.5232       | 0.4768      | 0.035*                                            |
| C5  | 0.3520 (5)   | 0.5974 (9)   | 0.3673 (3)  | 0.0257 (11)                                       |
| C6  | 0.2425 (5)   | 0.5160 (10)  | 0.3144 (3)  | 0.0266 (11)                                       |
| C7  | 0.1532 (5)   | 0.3148 (11)  | 0.3342 (3)  | 0.0299 (11)                                       |
| H7  | 0.0810       | 0.2636       | 0.2982      | 0.036*                                            |
| C8  | 0.3679 (5)   | 0.8348 (10)  | 0.2137 (3)  | 0.0254 (10)                                       |
| C9  | 0.4526 (5)   | 0.9136 (10)  | 0.2872 (3)  | 0.0243 (10)                                       |
| C10 | 0.5601 (5)   | 1.1257 (11)  | 0.2847 (2)  | 0.0248 (10)                                       |
| C11 | 0.6634 (5)   | 1.1404 (12)  | 0.3469 (2)  | 0.0305 (11)                                       |
| H11 | 0.6634       | 1.0186       | 0.3876      | 0.037*                                            |
| C12 | 0.7653 (5)   | 1.3320 (11)  | 0.3491 (3)  | 0.0340 (12)                                       |
| H12 | 0.8319       | 1.3396       | 0.3914      | 0.041*                                            |
| C13 | 0.7685 (6)   | 1.5134 (11)  | 0.2881 (3)  | 0.0325 (12)                                       |
| H13 | 0.8380       | 1.6401       | 0.2886      | 0.039*                                            |
| C14 | 0.6663 (5)   | 1.5013 (11)  | 0.2270 (3)  | 0.0322 (12)                                       |
| H14 | 0.6666       | 1.6232       | 0.1863      | 0.039*                                            |
| C15 | 0.5631 (5)   | 1.3107 (10)  | 0.2250 (3)  | 0.0309 (11)                                       |
| H15 | 0.4953       | 1.3071       | 0.1833      | 0.037*                                            |
| C16 | 0.3295 (5)   | 0.8121 (10)  | 0.0769 (3)  | 0.0261 (10)                                       |



|     |            |             |             |             |
|-----|------------|-------------|-------------|-------------|
| C17 | 0.3812 (5) | 0.6133 (11) | 0.0319 (3)  | 0.0341 (12) |
| H17 | 0.4636     | 0.5291      | 0.0486      | 0.041*      |
| C18 | 0.3087 (6) | 0.5416 (12) | -0.0381 (3) | 0.0370 (13) |
| H18 | 0.3440     | 0.4085      | -0.0680     | 0.044*      |
| C19 | 0.1859 (5) | 0.6603 (13) | -0.0649 (2) | 0.0323 (11) |
| C20 | 0.1373 (5) | 0.8623 (12) | -0.0205 (3) | 0.0362 (13) |
| H20 | 0.0560     | 0.9487      | -0.0380     | 0.043*      |
| C21 | 0.2083 (5) | 0.9390 (11) | 0.0501 (3)  | 0.0341 (12) |
| H21 | 0.1742     | 1.0757      | 0.0793      | 0.041*      |
| C22 | 0.1075 (6) | 0.5730 (12) | -0.1411 (3) | 0.0395 (14) |
| H22 | 0.1705     | 0.5511      | -0.1802     | 0.059*      |
| H22 | 0.0404     | 0.7058      | -0.1579     | 0.059*      |
| H22 | 0.0620     | 0.4070      | -0.1334     | 0.059*      |

**Table 3 Atomic displacement parameters (Å<sup>2</sup>)**

|     | $U^{11}$  | $U^{22}$ | $U^{33}$   | $U^{12}$    | $U^{13}$   | $U^{23}$     |
|-----|-----------|----------|------------|-------------|------------|--------------|
| S1  | 0.0302    | 0.0491   | 0.0222 (6) | -0.0073 (7) | -0.0053    | 0.0075 (6)   |
| N1  | 0.029 (2) | 0.033    | 0.0198     | 0.0009 (19) | -0.0012    | -0.0036 (18) |
| N2  | 0.034 (2) | 0.038    | 0.019 (2)  | -0.007 (2)  | -0.0006    | -0.0013 (18) |
| C1  | 0.033 (3) | 0.033    | 0.029 (3)  | -0.001 (2)  | 0.001 (2)  | 0.001 (2)    |
| C2  | 0.028 (2) | 0.026    | 0.026 (2)  | -0.001 (2)  | 0.0041     | 0.001 (2)    |
| C3  | 0.032 (3) | 0.037    | 0.018 (2)  | 0.003 (2)   | 0.001 (2)  | 0.003 (2)    |
| C4  | 0.032 (3) | 0.033    | 0.022 (2)  | 0.002 (2)   | 0.001 (2)  | -0.003 (2)   |
| C5  | 0.027 (2) | 0.029    | 0.021 (2)  | -0.002 (2)  | 0.0006     | -0.0025 (19) |
| C6  | 0.029 (3) | 0.033    | 0.018 (2)  | 0.001 (2)   | 0.0020     | 0.000 (2)    |
| C7  | 0.028 (3) | 0.038    | 0.023 (2)  | 0.004 (2)   | -0.001 (2) | -0.002 (2)   |
| C8  | 0.024 (2) | 0.029    | 0.023 (2)  | -0.001 (2)  | 0.0004     | 0.002 (2)    |
| C9  | 0.023 (2) | 0.028    | 0.022 (2)  | 0.001 (2)   | 0.0009     | -0.0001 (19) |
| C10 | 0.022 (2) | 0.028    | 0.023 (2)  | 0.003 (2)   | 0.0020     | -0.001 (2)   |
| C11 | 0.034 (3) | 0.035    | 0.021 (2)  | 0.002 (3)   | -0.0048    | 0.001 (2)    |
| C12 | 0.029 (3) | 0.044    | 0.027 (3)  | 0.007 (3)   | -0.007 (2) | -0.001 (2)   |
| C13 | 0.030 (3) | 0.034    | 0.034 (3)  | -0.005 (2)  | 0.003 (2)  | -0.002 (2)   |
| C14 | 0.037 (3) | 0.029    | 0.029 (3)  | -0.003 (2)  | -0.001 (2) | 0.002 (2)    |
| C15 | 0.032 (3) | 0.035    | 0.024 (2)  | 0.001 (2)   | -0.003 (2) | -0.004 (2)   |
| C16 | 0.027 (2) | 0.033    | 0.018 (2)  | -0.008 (2)  | -0.0011    | 0.005 (2)    |
| C17 | 0.037 (3) | 0.037    | 0.027 (2)  | 0.001 (3)   | -0.003 (2) | -0.006 (2)   |
| C18 | 0.039 (3) | 0.043    | 0.029 (3)  | 0.001 (3)   | 0.000 (2)  | -0.009 (2)   |
| C19 | 0.034 (3) | 0.044    | 0.018 (2)  | -0.006 (3)  | -0.0005    | 0.000 (3)    |
| C20 | 0.029 (3) | 0.049    | 0.029 (3)  | 0.001 (3)   | -0.004 (2) | 0.001 (2)    |
| C21 | 0.033 (3) | 0.039    | 0.030 (3)  | 0.002 (3)   | 0.002 (2)  | -0.005 (2)   |
| C22 | 0.038 (3) | 0.053    | 0.026 (3)  | -0.010 (3)  | -0.003 (2) | -0.001 (2)   |

**Table 4 Geometric parameters (Å, °)**

---

|         |           |
|---------|-----------|
| S1—C6   | 1.747 (5) |
| S1—C8   | 1.772 (5) |
| N1—C5   | 1.389 (6) |
| N1—C9   | 1.294 (6) |
| N2—C8   | 1.281 (6) |
| N2—C16  | 1.424 (6) |
| C1—H1A  | 0.9600    |
| C1—H1B  | 0.9600    |
| C1—H1C  | 0.9600    |
| C1—C2   | 1.497 (7) |
| C2—C3   | 1.401 (6) |
| C2—C7   | 1.392 (6) |
| C3—H3   | 0.9300    |
| C3—C4   | 1.381 (7) |
| C4—H4   | 0.9300    |
| C4—C5   | 1.403 (6) |
| C5—C6   | 1.398 (6) |
| C6—C7   | 1.398 (7) |
| C7—H7   | 0.9300    |
| C8—C9   | 1.498 (6) |
| C9—C10  | 1.500 (7) |
| C10—C11 | 1.400 (6) |
| C10—C15 | 1.387 (7) |
| C11—H11 | 0.9300    |
| C11—C12 | 1.382 (7) |
| C12—H12 | 0.9300    |
| C12—C13 | 1.391 (7) |
| C13—H13 | 0.9300    |
| C13—C14 | 1.381 (7) |
| C14—H14 | 0.9300    |
| C14—C15 | 1.388 (7) |
| C15—H15 | 0.9300    |
| C16—C17 | 1.387 (7) |
| C16—C21 | 1.384 (7) |
| C17—H17 | 0.9300    |
| C17—C18 | 1.385 (7) |

|          |           |
|----------|-----------|
| C18—H18  | 0.9300    |
| C18—C19  | 1.379 (7) |
| C19—C20  | 1.380 (8) |
| C19—C22  | 1.519 (6) |
| C20—H20  | 0.9300    |
| C20—C21  | 1.395 (7) |
| C21—H21  | 0.9300    |
| C22—H22A | 0.9600    |
| C22—H22B | 0.9600    |
| C22—H22C | 0.9600    |

|            |           |
|------------|-----------|
| C6—S1—C8   | 101.9 (2) |
| C9—N1—C5   | 124.4 (4) |
| C8—N2—C16  | 120.4 (4) |
| H1A—C1—H1B | 109.5     |
| H1A—C1—H1C | 109.5     |
| H1B—C1—H1C | 109.5     |
| C2—C1—H1A  | 109.5     |
| C2—C1—H1B  | 109.5     |
| C2—C1—H1C  | 109.5     |
| C3—C2—C1   | 120.7 (4) |
| C7—C2—C1   | 121.8 (4) |
| C7—C2—C3   | 117.6 (5) |
| C2—C3—H3   | 119.4     |
| C4—C3—C2   | 121.2 (4) |
| C4—C3—H3   | 119.4     |
| C3—C4—H4   | 119.3     |
| C3—C4—C5   | 121.4 (5) |
| C5—C4—H4   | 119.3     |
| N1—C5—C4   | 117.3 (4) |
| N1—C5—C6   | 125.0 (4) |
| C6—C5—C4   | 117.7 (4) |

|             |           |
|-------------|-----------|
| C5—C6—S1    | 121.8 (4) |
| C5—C6—C7    | 120.6 (4) |
| C7—C6—S1    | 117.6 (4) |
| C2—C7—C6    | 121.5 (5) |
| C2—C7—H7    | 119.3     |
| C6—C7—H7    | 119.3     |
| N2—C8—S1    | 121.2 (4) |
| N2—C8—C9    | 120.3 (4) |
| C9—C8—S1    | 118.5 (3) |
| N1—C9—C8    | 123.8 (4) |
| N1—C9—C10   | 116.4 (4) |
| C8—C9—C10   | 119.7 (4) |
| C11—C10—C9  | 118.1 (4) |
| C15—C10—C9  | 124.1 (4) |
| C15—C10—C11 | 117.7 (5) |
| C10—C11—H11 | 119.3     |
| C12—C11—C10 | 121.5 (5) |
| C12—C11—H11 | 119.3     |
| C11—C12—H12 | 119.9     |
| C11—C12—C13 | 120.2 (5) |
| C13—C12—H12 | 119.9     |
| C12—C13—H13 | 120.7     |
| C14—C13—C12 | 118.6 (5) |
| C14—C13—H13 | 120.7     |
| C13—C14—H14 | 119.3     |
| C13—C14—C15 | 121.3 (5) |
| C15—C14—H14 | 119.3     |
| C10—C15—C14 | 120.7 (4) |
| C10—C15—H15 | 119.7     |
| C14—C15—H15 | 119.7     |
| C17—C16—N2  | 118.3 (4) |
| C21—C16—N2  | 122.1 (5) |

|               |            |
|---------------|------------|
| C21—C16—C17   | 119.4 (4)  |
| C16—C17—H17   | 120.4      |
| C18—C17—C16   | 119.3 (5)  |
| C18—C17—H17   | 120.4      |
| C17—C18—H18   | 118.8      |
| C19—C18—C17   | 122.4 (5)  |
| C19—C18—H18   | 118.8      |
| C18—C19—C20   | 117.8 (4)  |
| C18—C19—C22   | 121.0 (5)  |
| C20—C19—C22   | 121.1 (5)  |
| C19—C20—H20   | 119.5      |
| C19—C20—C21   | 121.0 (5)  |
| C21—C20—H20   | 119.5      |
| C16—C21—C20   | 120.1 (5)  |
| C16—C21—H21   | 119.9      |
| C20—C21—H21   | 119.9      |
| C19—C22—H22A  | 109.5      |
| C19—C22—H22B  | 109.5      |
| C19—C22—H22C  | 109.5      |
| H22A—C22—H22B | 109.5      |
| H22A—C22—H22C | 109.5      |
| H22B—C22—H22C | 109.5      |
|               |            |
| S1—C6—C7—C2   | 179.2 (4)  |
| S1—C8—C9—N1   | 20.1 (7)   |
| S1—C8—C9—C10  | -162.8 (4) |
| N1—C5—C6—S1   | 3.2 (7)    |
| N1—C5—C6—C7   | -177.6 (5) |
| N1—C9—C10—C11 | 16.1 (7)   |
| N1—C9—C10—C15 | -163.2 (5) |
| N2—C8—C9—N1   | -158.4 (5) |
| N2—C8—C9—C10  | 18.7 (7)   |

|                 |            |
|-----------------|------------|
| N2—C16—C7—C18   | -177.3 (5) |
| N2—C16—C7—C20   | 177.3 (5)  |
| C1—C2—C3—C4     | -179.5 (5) |
| C1—C2—C7—C6     | -179.6 (5) |
| C2—C3—C4—C5     | -1.8 (8)   |
| C3—C2—C7—C6     | -0.7 (8)   |
| C3—C4—C5—N1     | 178.7 (5)  |
| C3—C4—C5—C6     | 1.0 (7)    |
| C4—C5—C6—S1     | -179.2 (4) |
| C4—C5—C6—C7     | -0.1 (7)   |
| C5—N1—C9—C8     | -1.3 (8)   |
| C5—N1—C9—C10    | -178.5 (4) |
| C5—C6—C7—C2     | 0.0 (8)    |
| C6—S1—C8—N2     | 155.9 (4)  |
| C6—S1—C8—C9     | -22.6 (4)  |
| C7—C2—C3—C4     | 1.6 (8)    |
| C8—S1—C6—C5     | 12.4 (5)   |
| C8—S1—C6—C7     | -166.7 (4) |
| C8—N2—C16—C17   | -110.1 (6) |
| C8—N2—C16—C21   | 74.2 (7)   |
| C8—C9—C10—C11   | -161.3 (5) |
| C8—C9—C10—C15   | 19.4 (7)   |
| C9—N1—C5—C4     | 170.8 (5)  |
| C9—N1—C5—C6     | -11.7 (8)  |
| C9—C10—C11—C12  | -179.4 (4) |
| C9—C10—C15—C14  | 180.0 (5)  |
| C10—C11—C12—C13 | -1.1 (8)   |
| C11—C10—C15—C14 | 0.7 (7)    |
| C11—C12—C13—C14 | 1.6 (8)    |
| C12—C13—C14—C15 | -0.9 (8)   |
| C13—C14—C15—C10 | -0.2 (8)   |
| C15—C10—C11—C12 | -0.1 (8)   |
| C16—N2—C8—S1    | 0.4 (7)    |
| C16—N2—C8—C9    | 178.9 (4)  |
| C16—C17—C18—C19 | -0.2 (8)   |
| C17—C16—C21—C20 | 1.6 (8)    |
| C17—C18—C19—C20 | 1.7 (9)    |
| C17—C18—C19—C22 | -178.7 (5) |
| C18—C19—C20—C21 | -1.6 (8)   |

|                 |           |
|-----------------|-----------|
| C19—C20—C21—C16 | -0.1 (8)  |
| C21—C16—C17—C18 | -1.5 (8)  |
| C22—C19—C20—C21 | 178.9 (5) |

# Copies of $^1\text{H}$ and $^{13}\text{C}$ NMR spectra of all products

## $^1\text{H}$ and $^{13}\text{C}$ NMR spectra of 3a

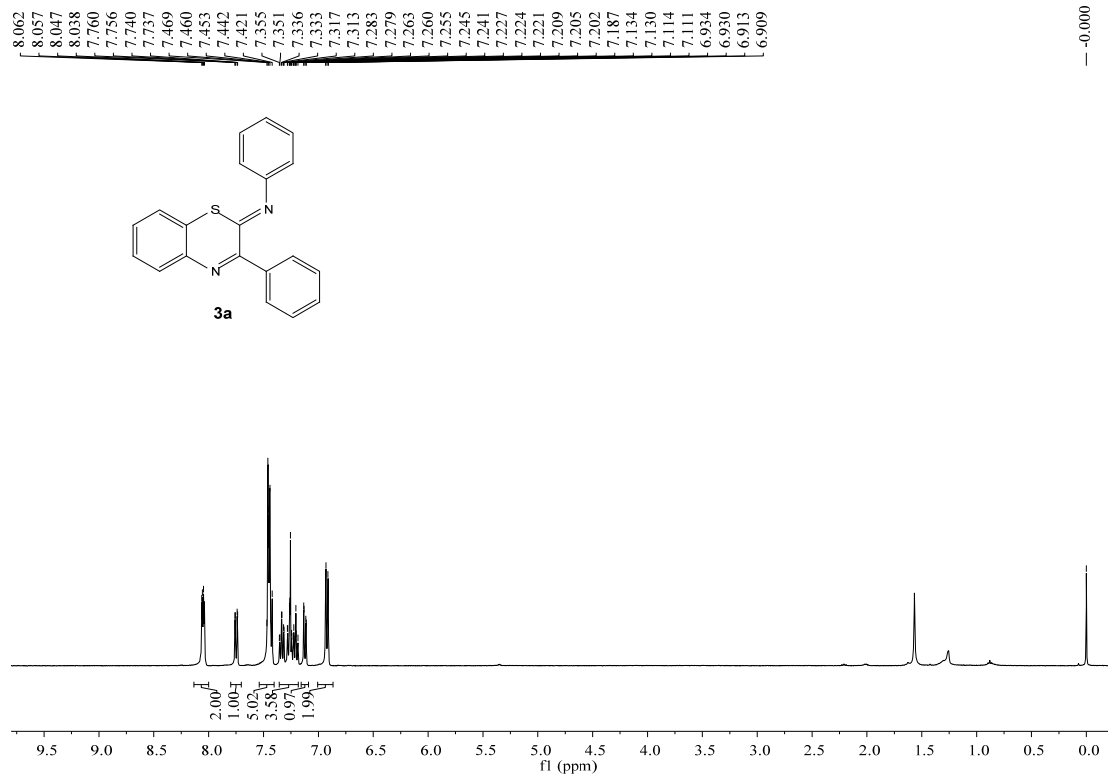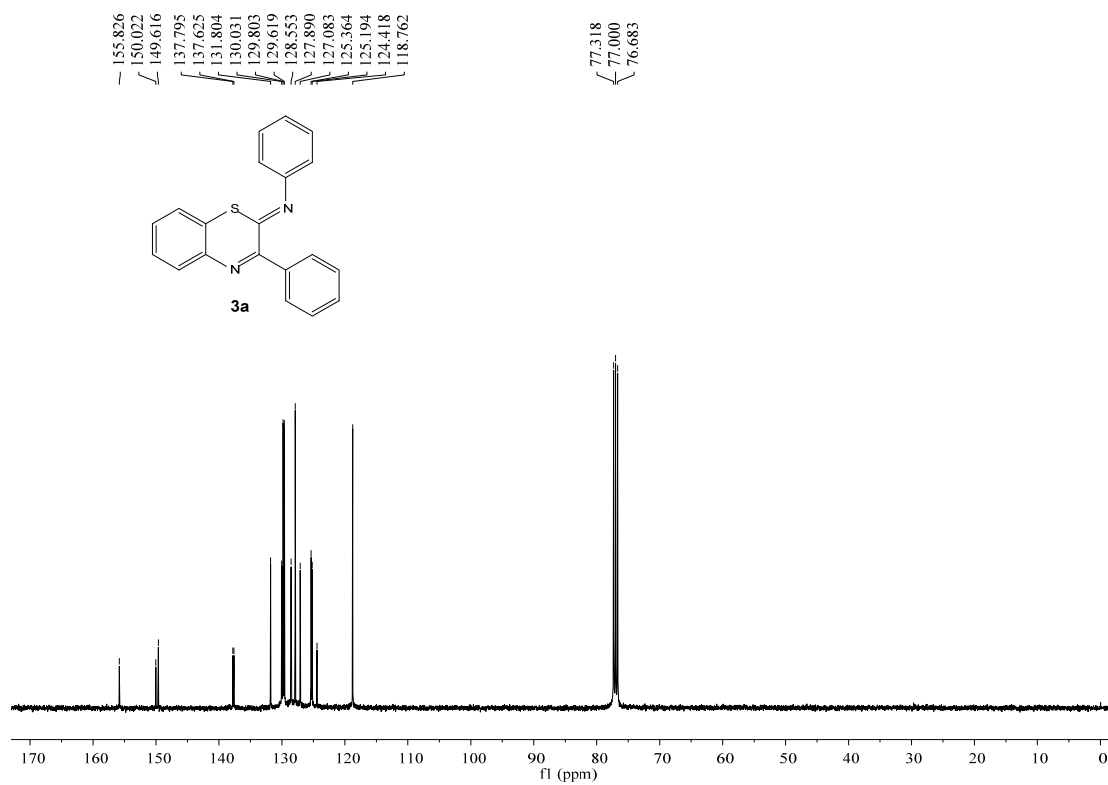



# $^1\text{H}$ and $^{13}\text{C}$ NMR spectra of **3b**

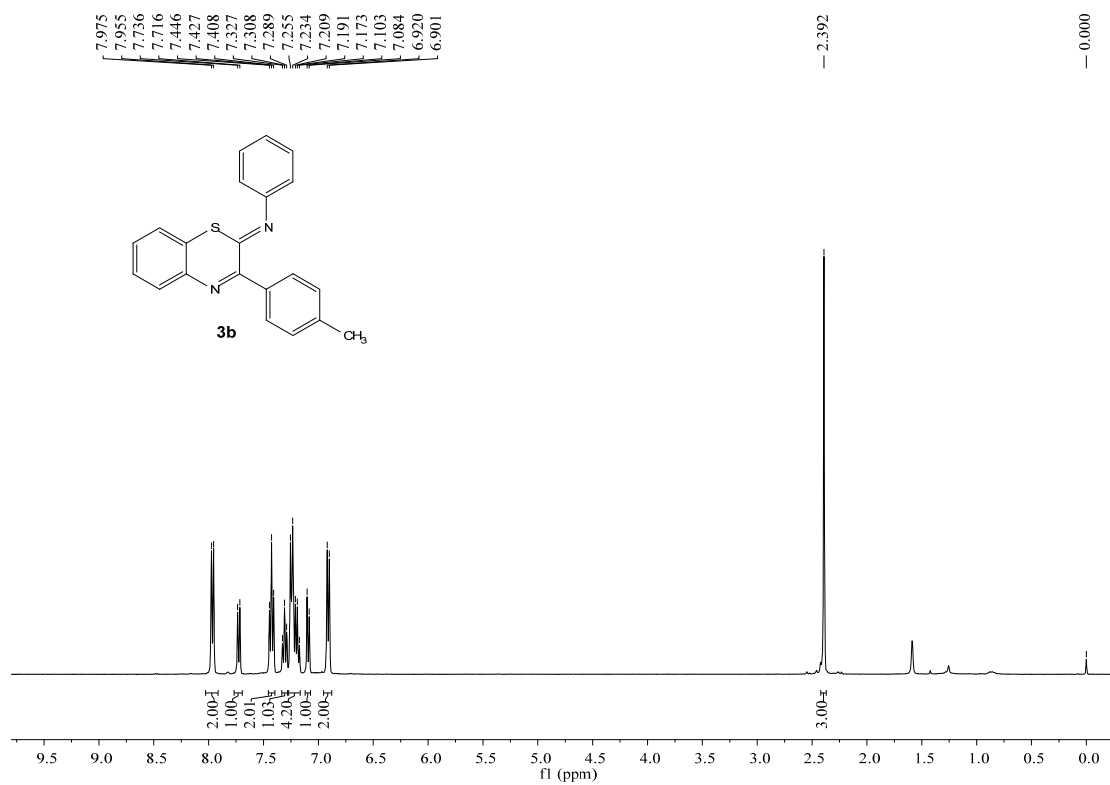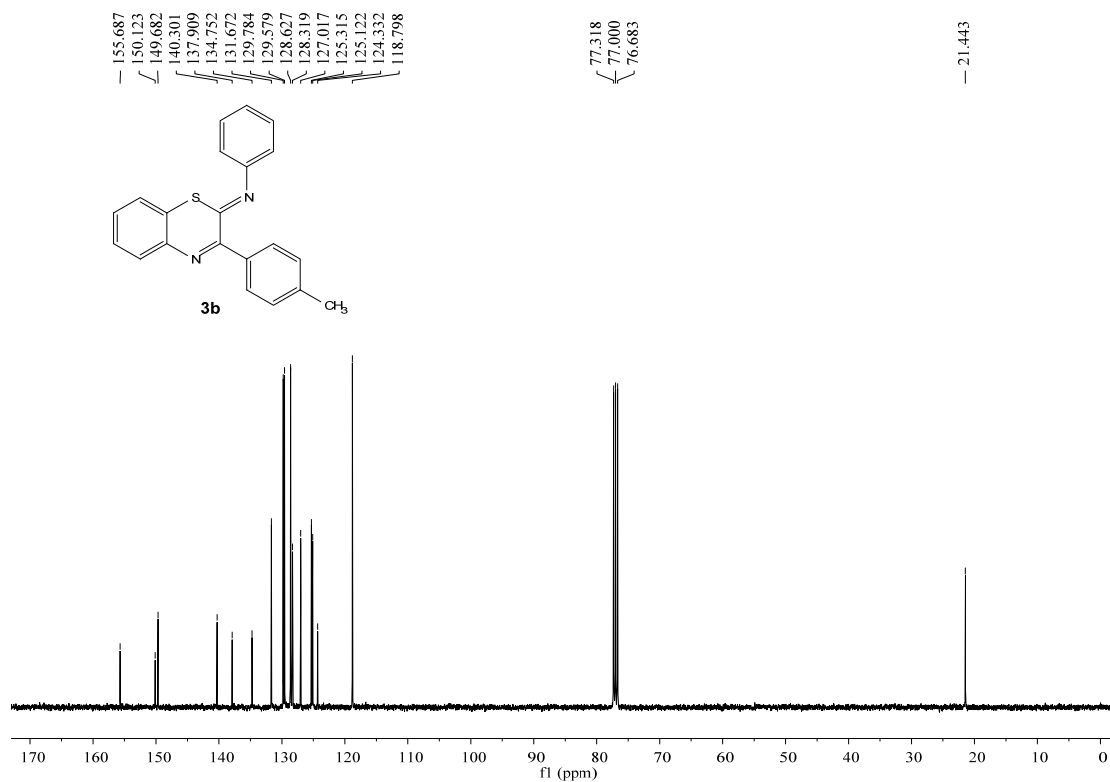



# $^1\text{H}$ and $^{13}\text{C}$ NMR spectra of 3d

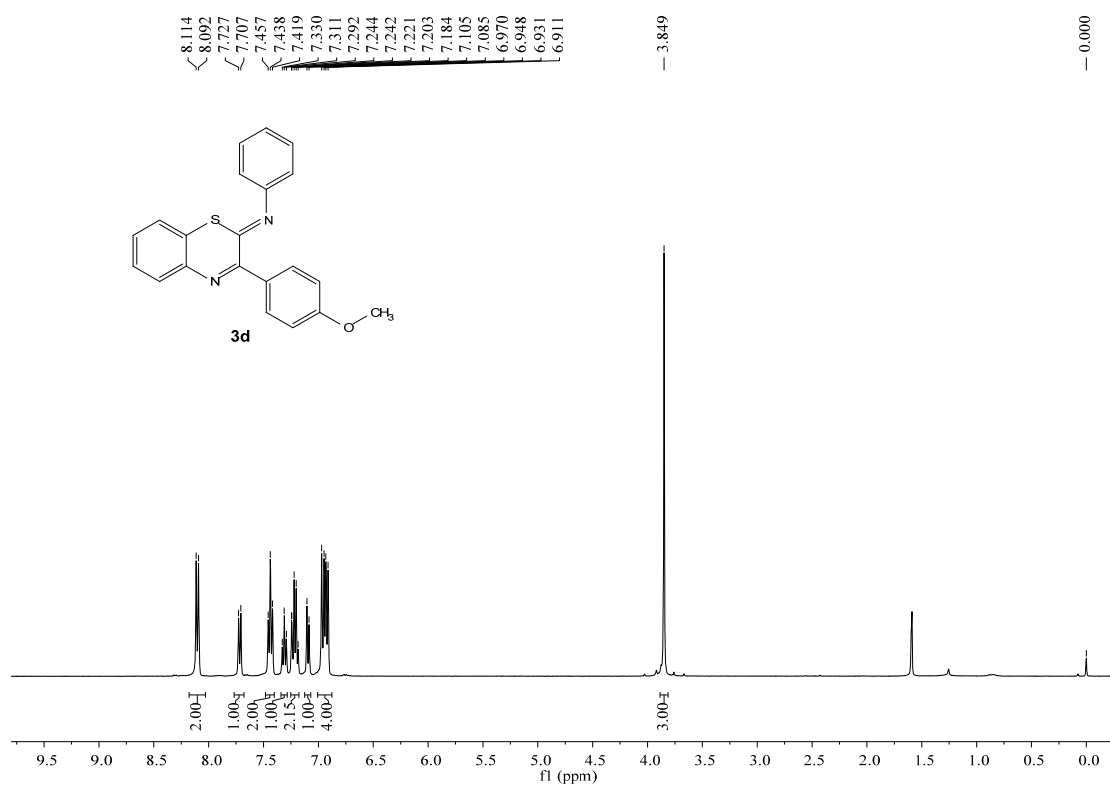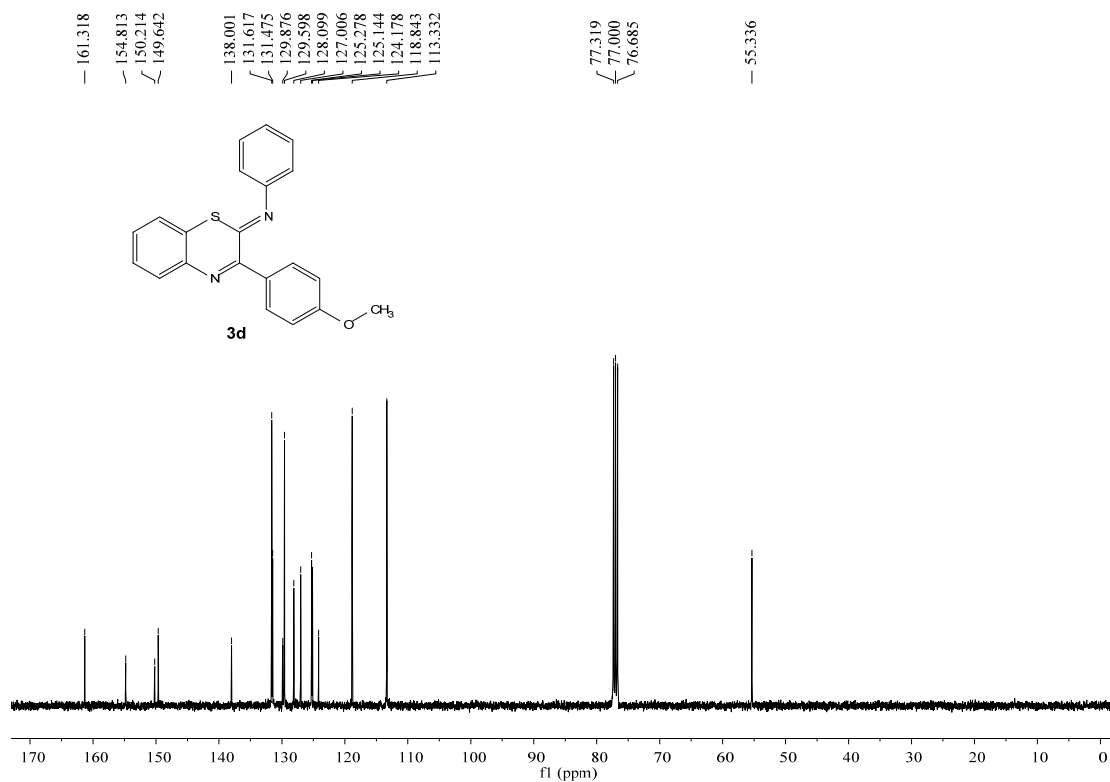

# $^1\text{H}$ , $^{13}\text{C}$ and $^{19}\text{F}$ NMR spectra of **3e**

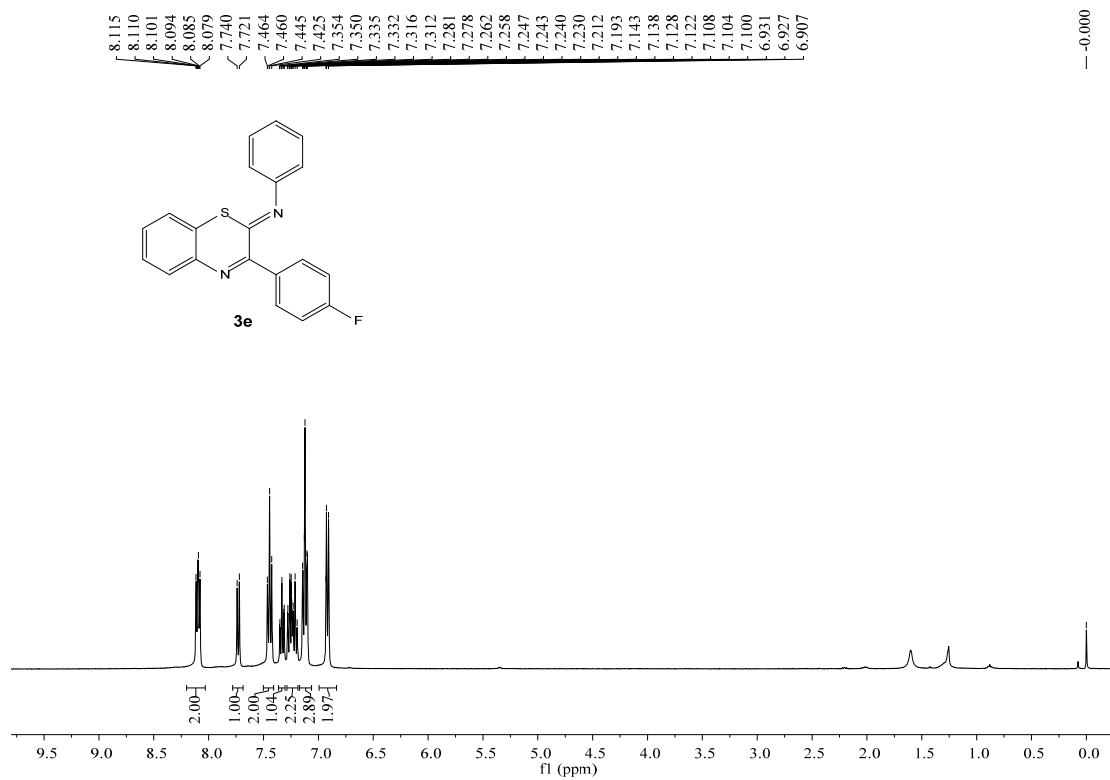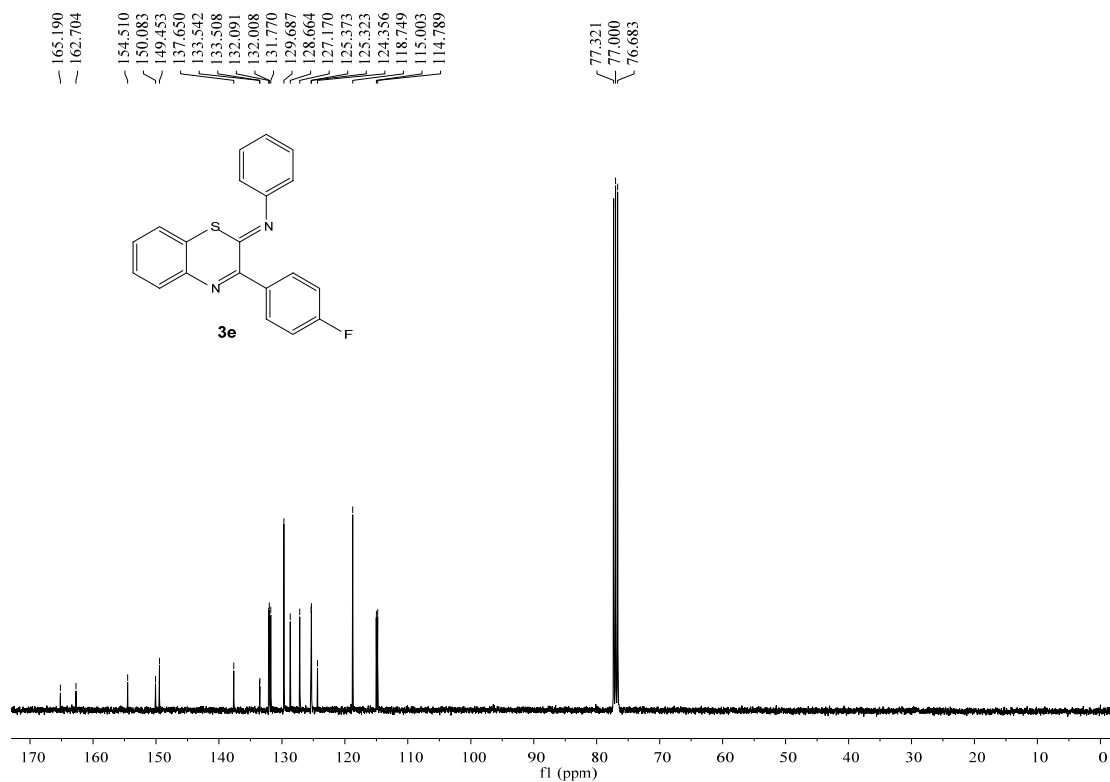

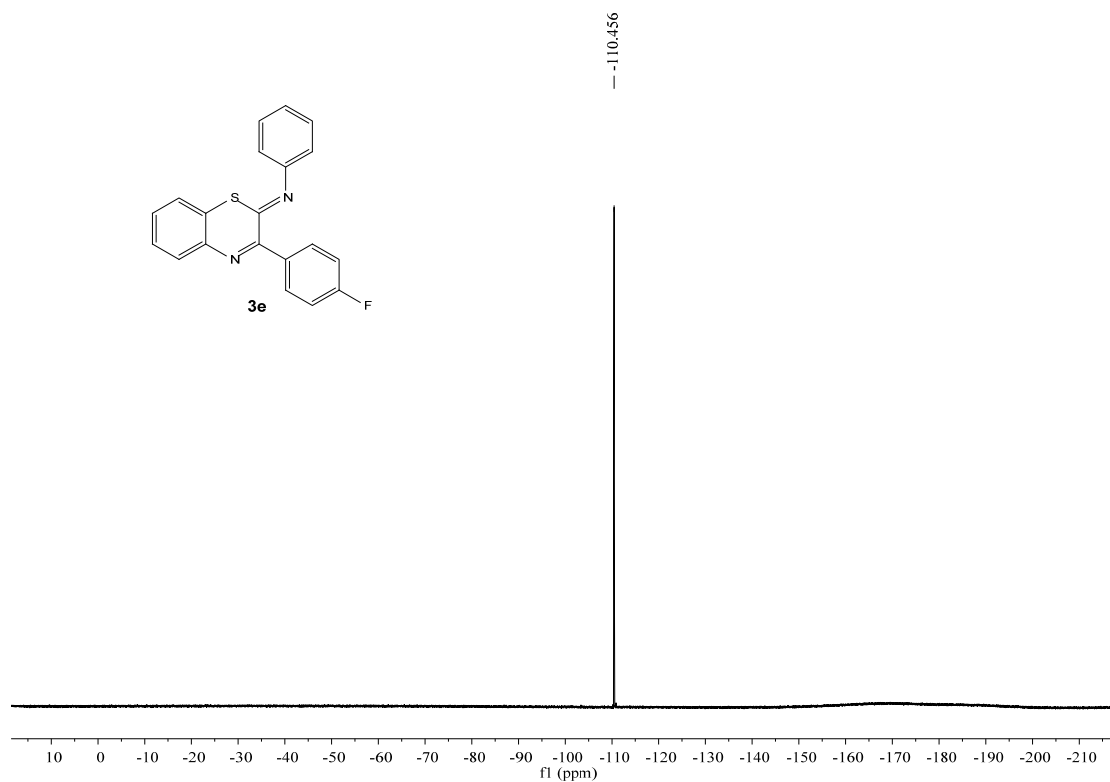

### <sup>1</sup>H and <sup>13</sup>C NMR spectra of 3f

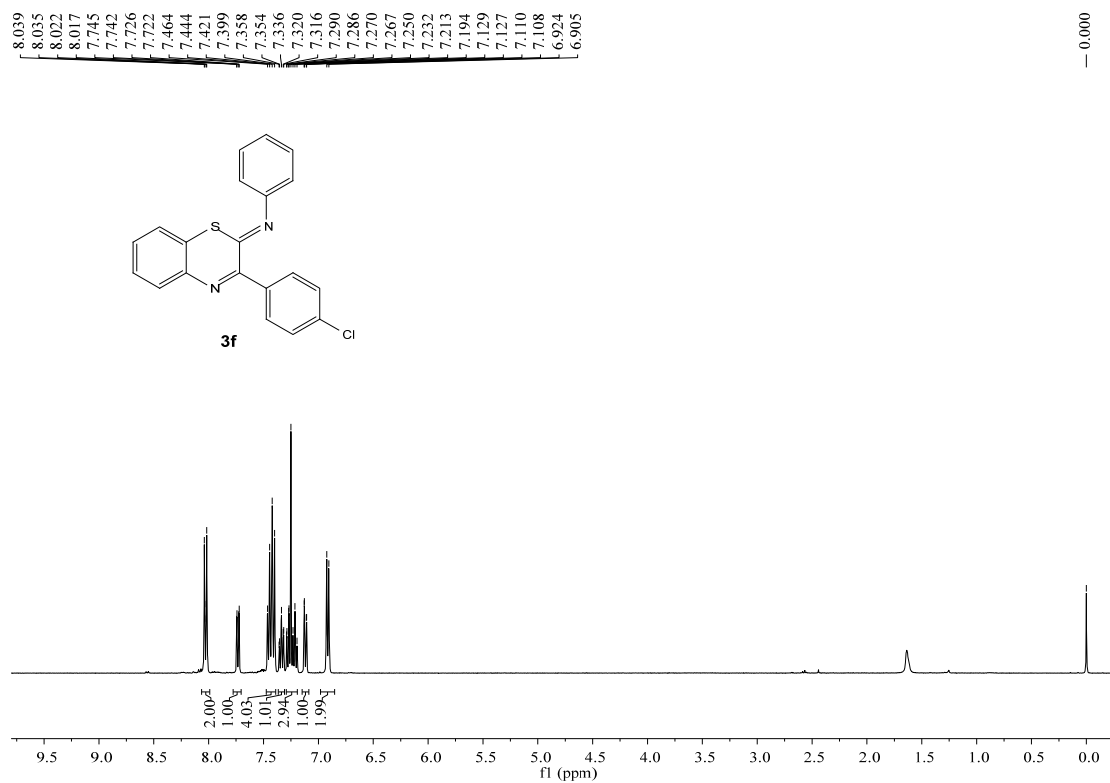

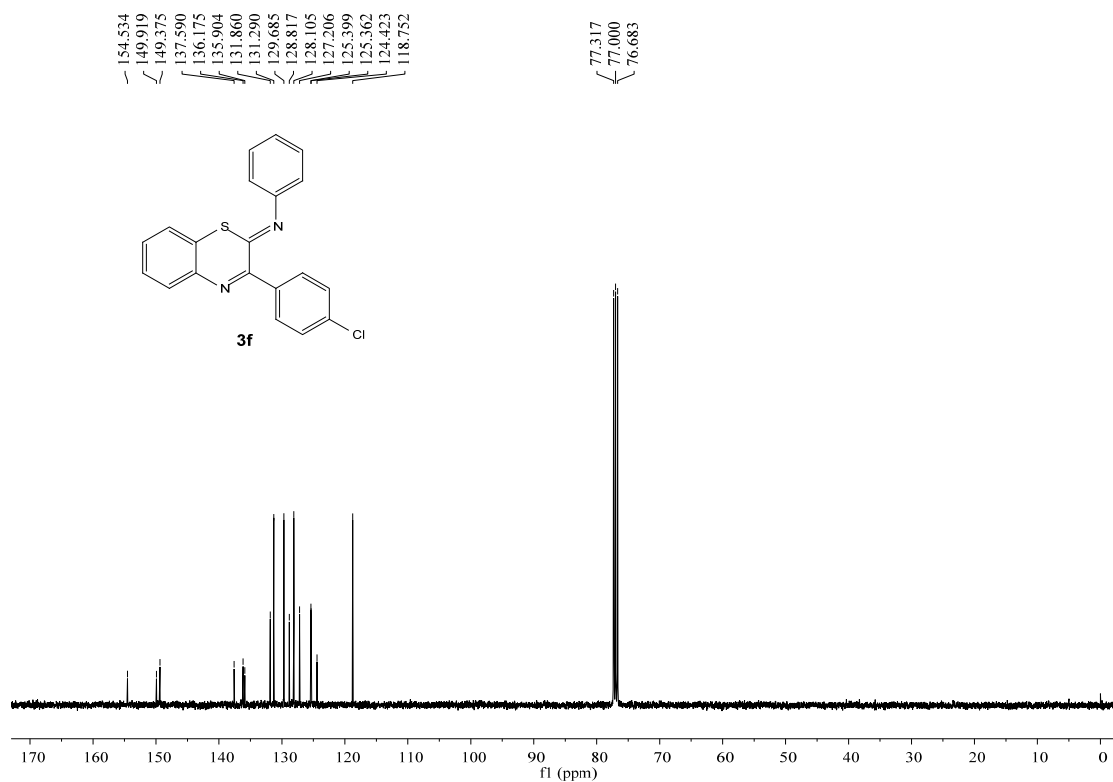

### <sup>1</sup>H and <sup>13</sup>C NMR spectra of 3g

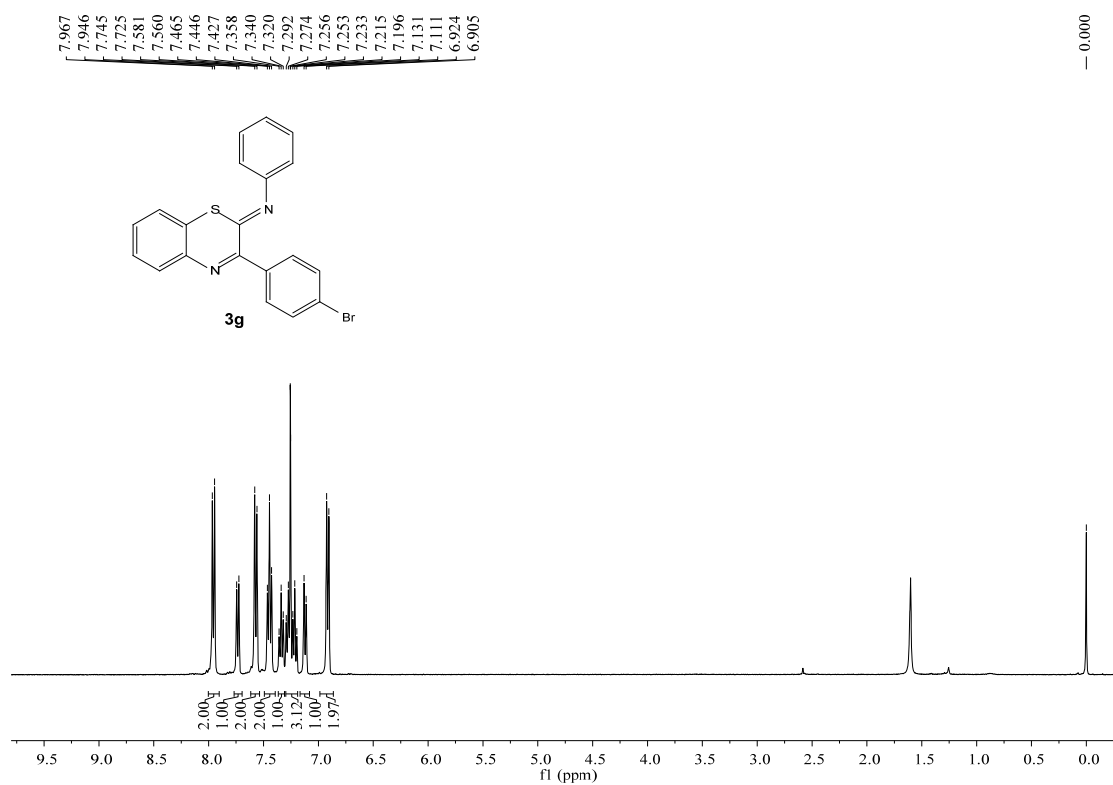

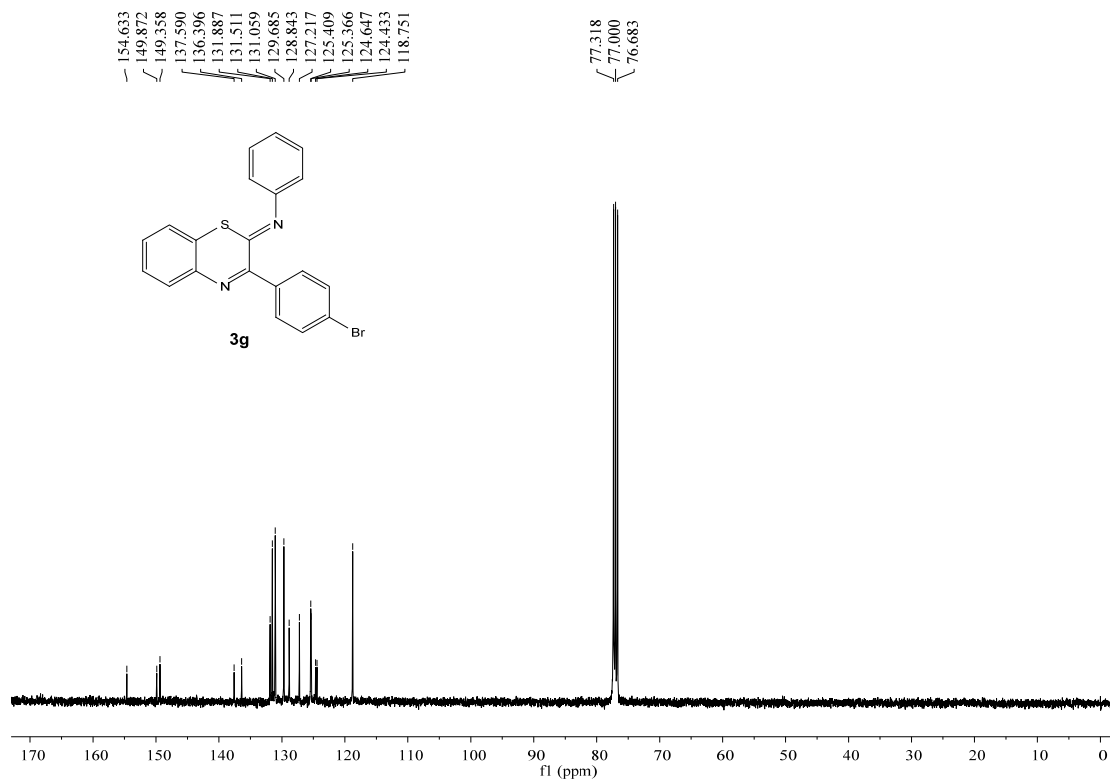

**<sup>1</sup>H and <sup>13</sup>C NMR spectra of 3h**

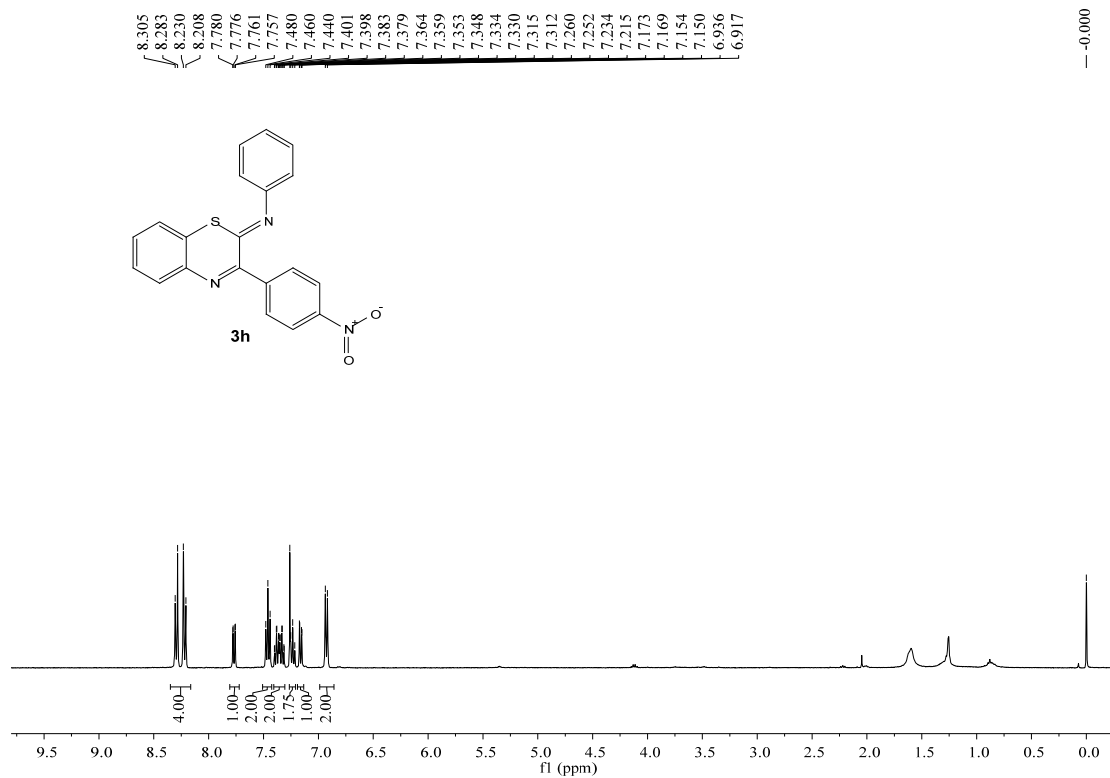

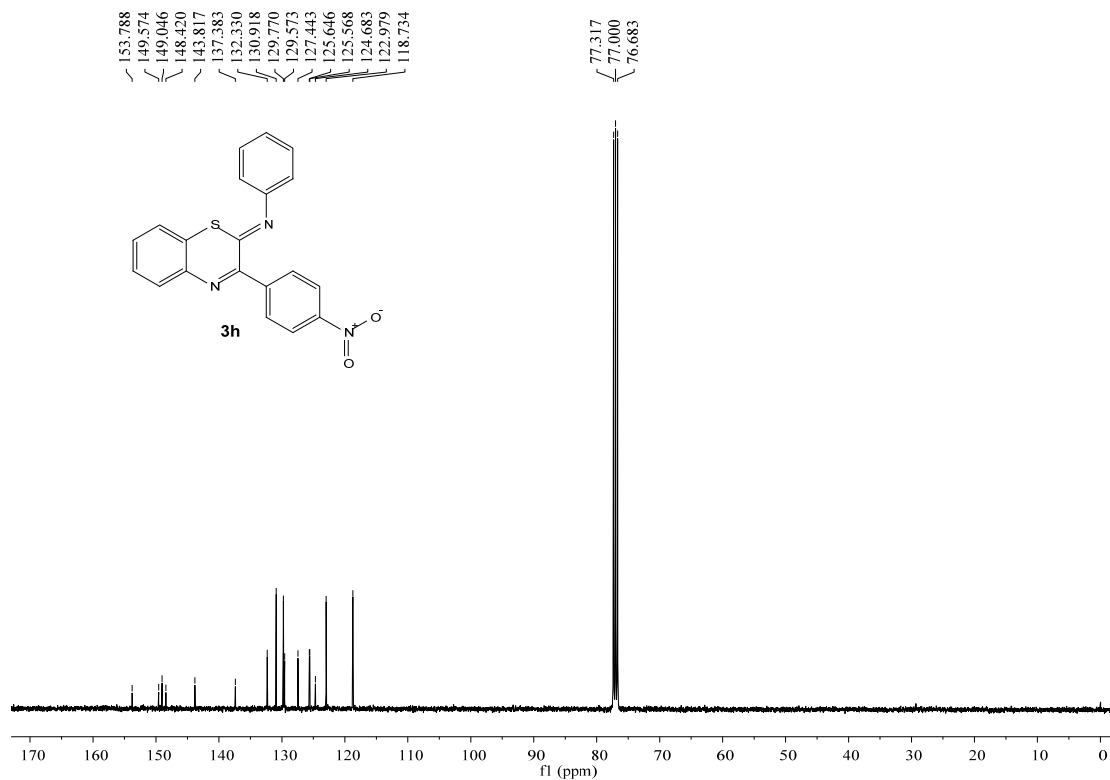

**<sup>1</sup>H and <sup>13</sup>C NMR spectra of 3i**

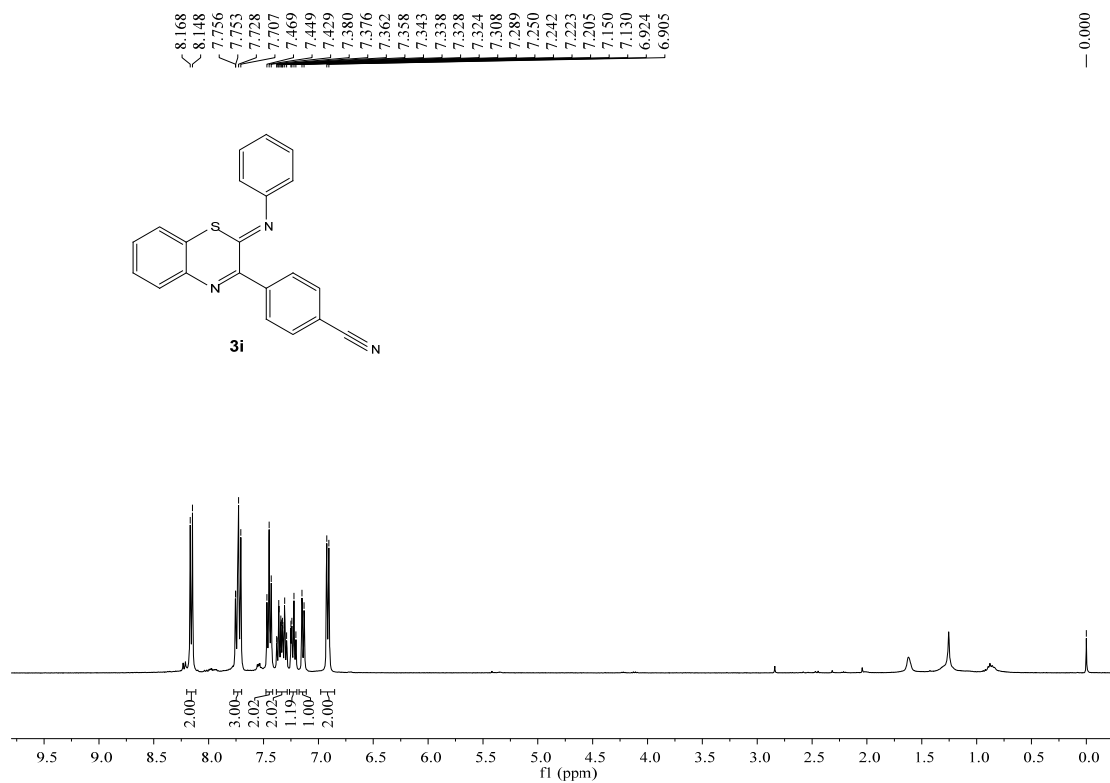



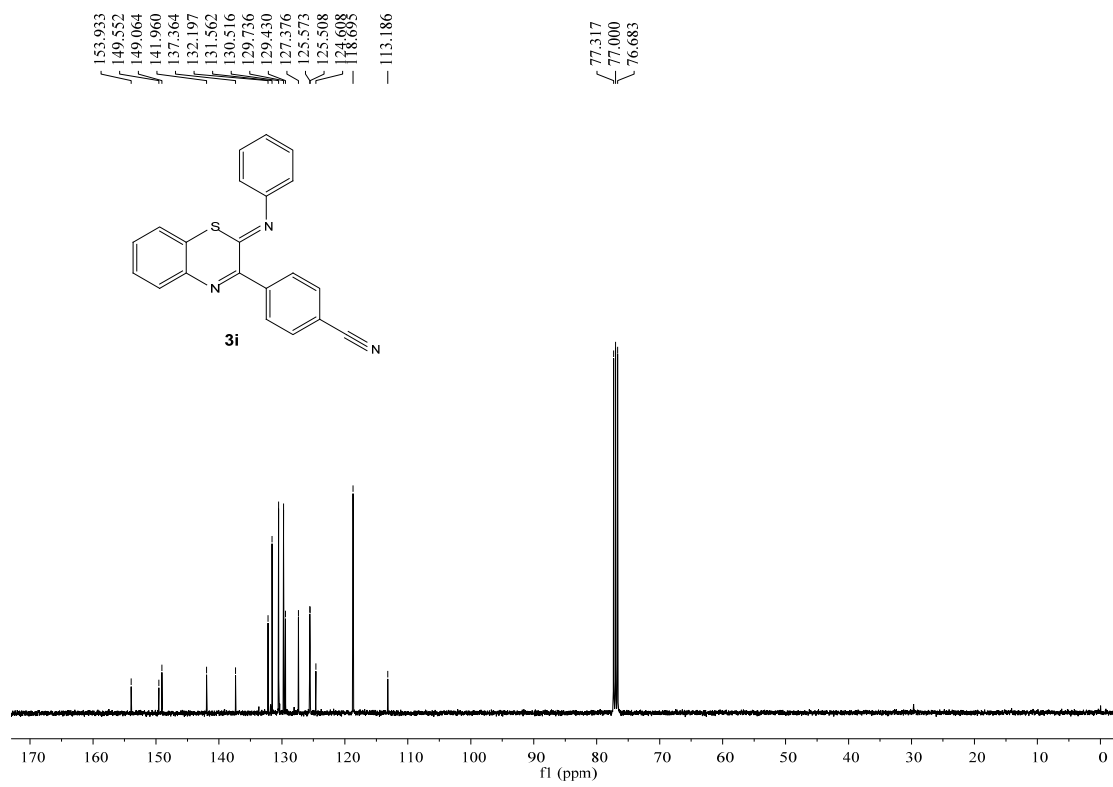

**<sup>1</sup>H, <sup>13</sup>C and <sup>19</sup>F NMR spectra of 3j**

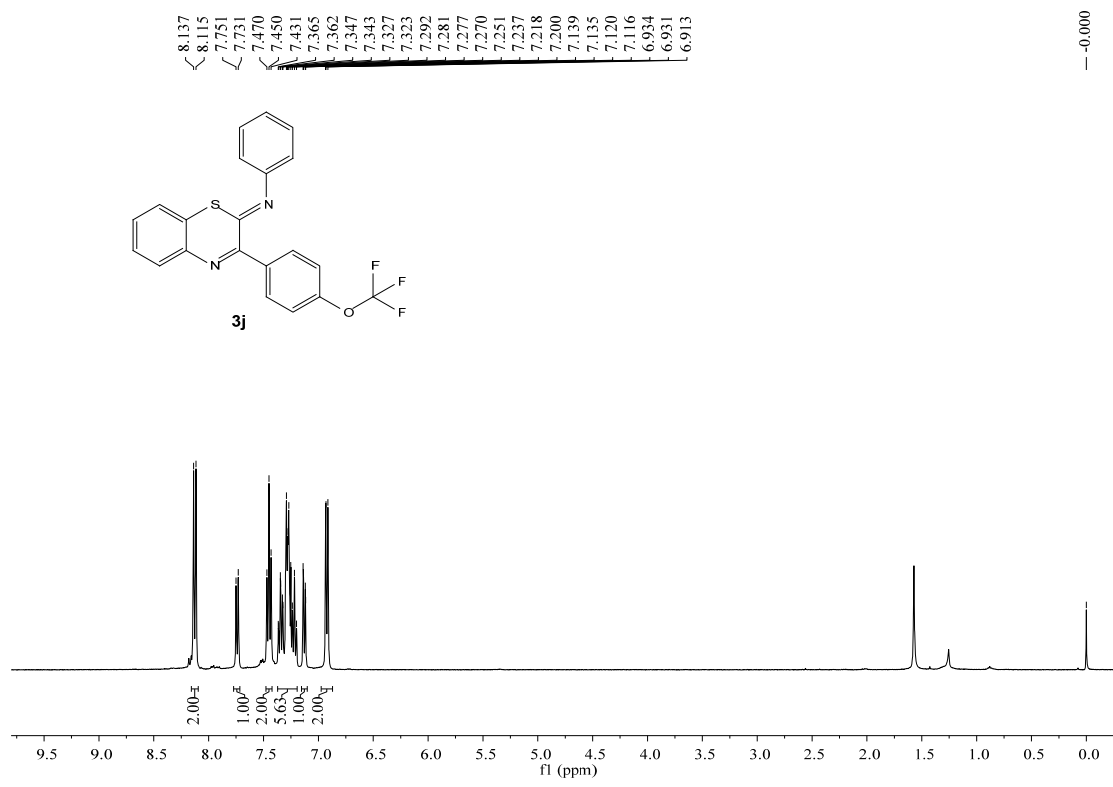

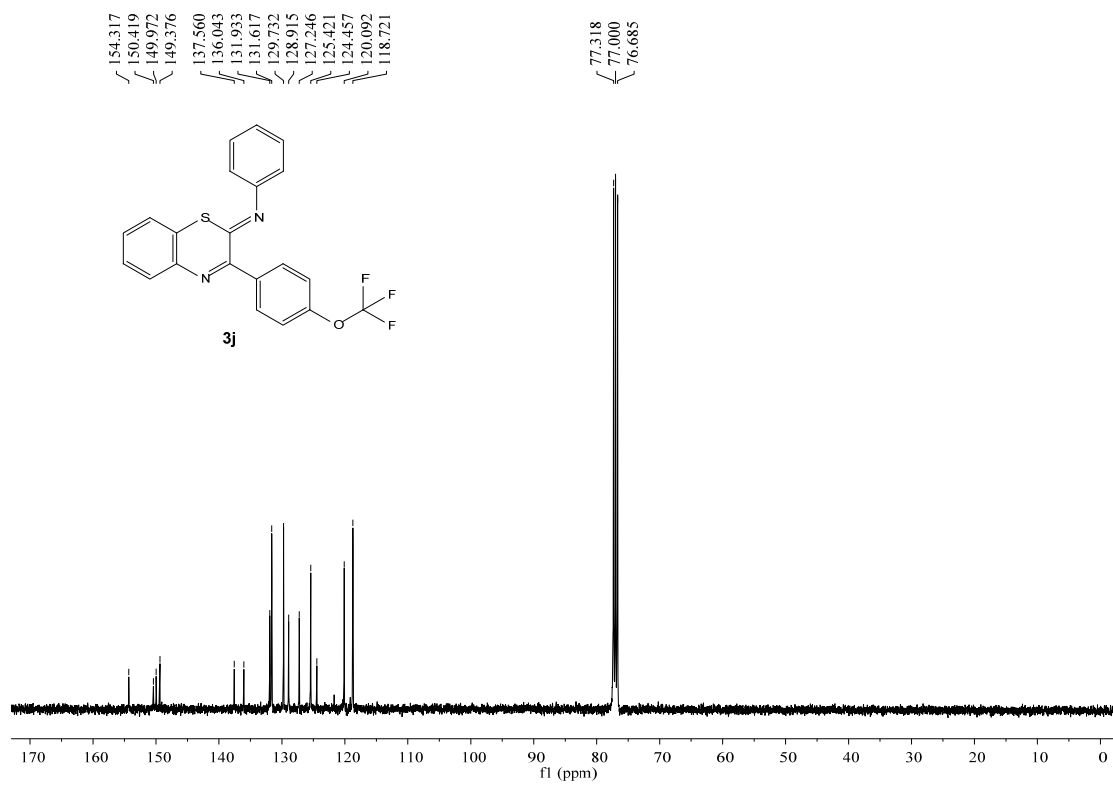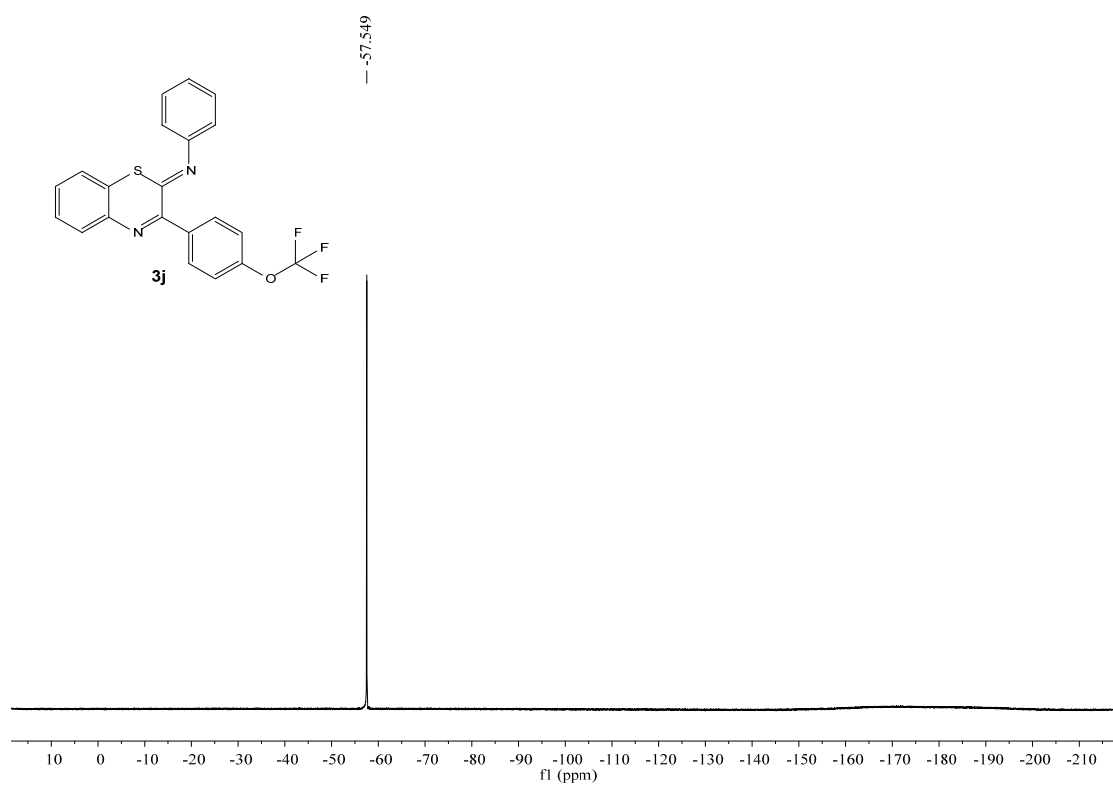

# <sup>1</sup>H and <sup>13</sup>C NMR spectra of 3k

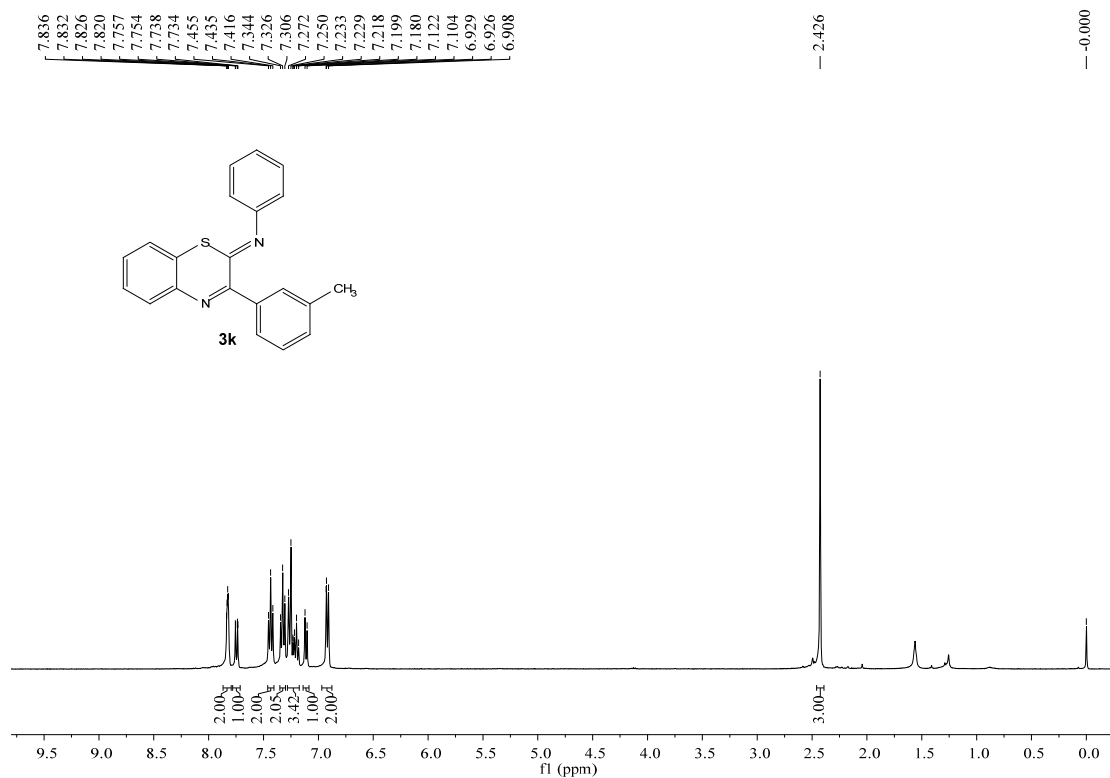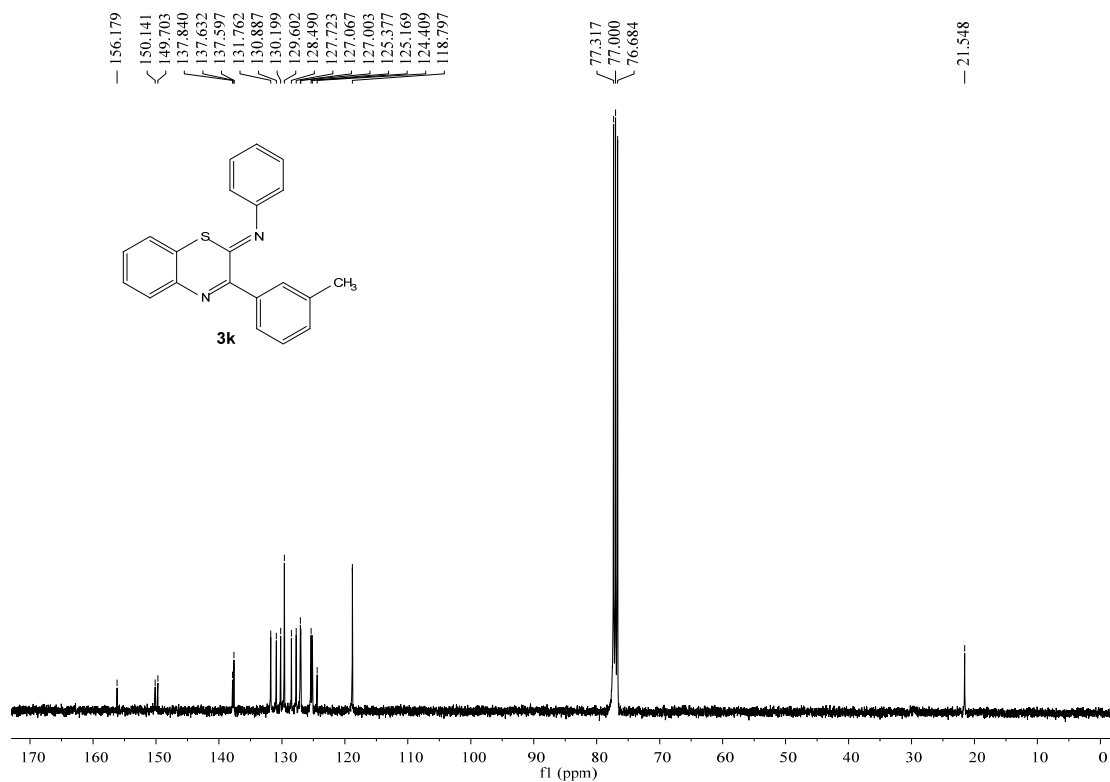

# <sup>1</sup>H and <sup>13</sup>C NMR spectra of 3l

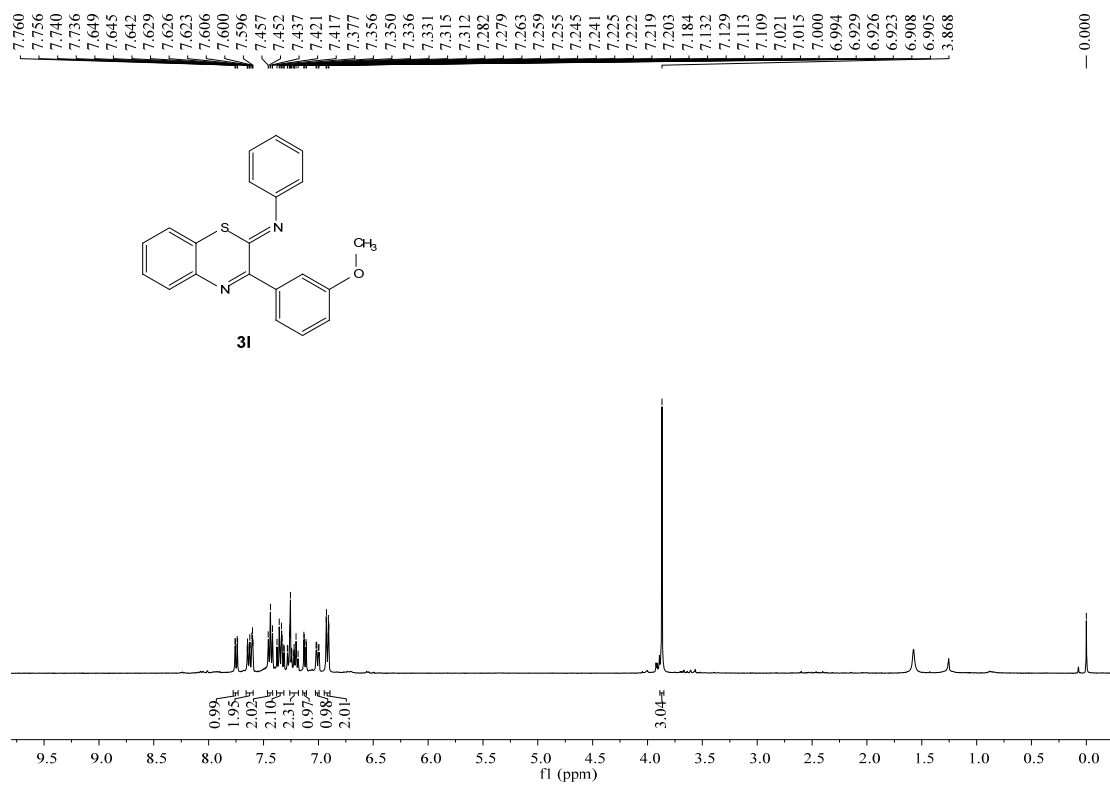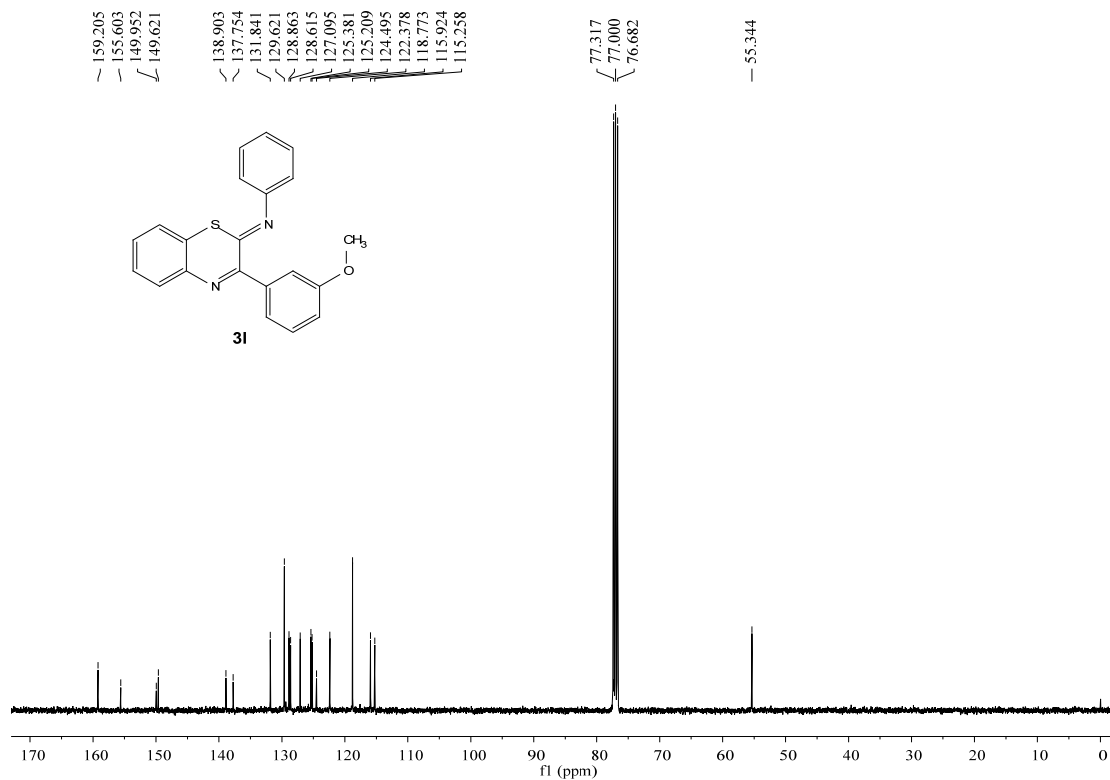

# $^1\text{H}$ and $^{13}\text{C}$ NMR spectra of 3m

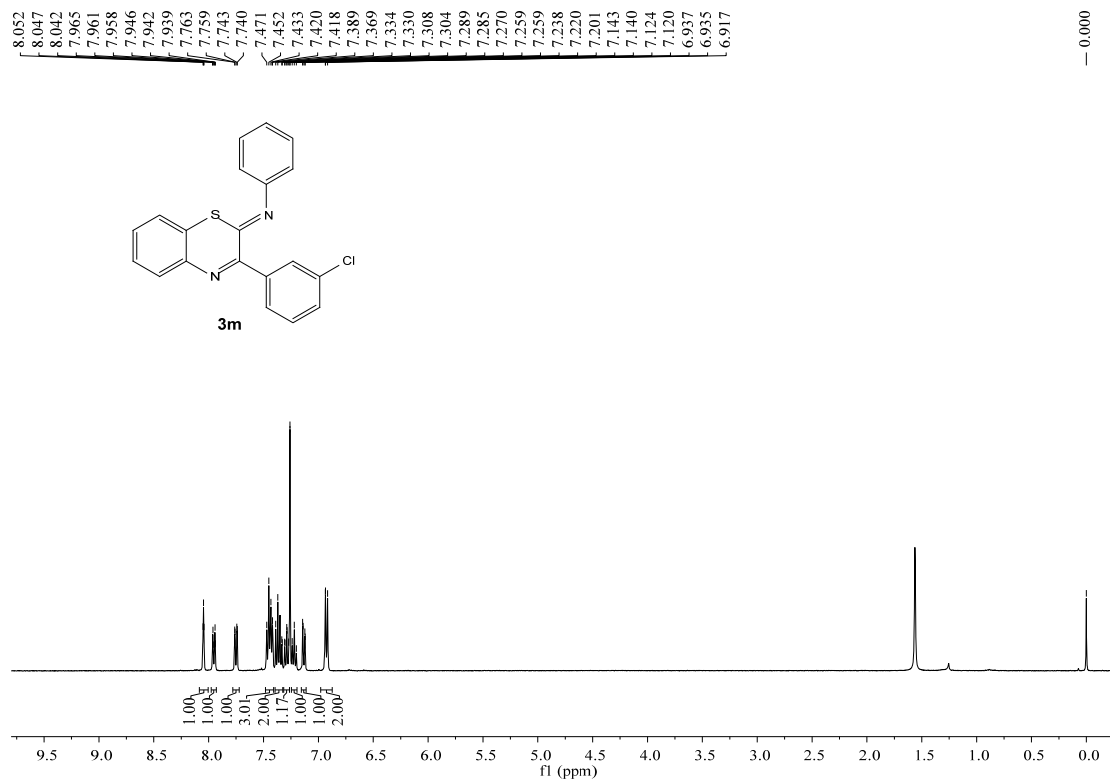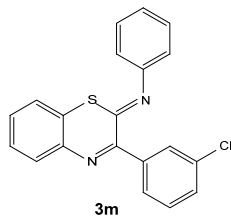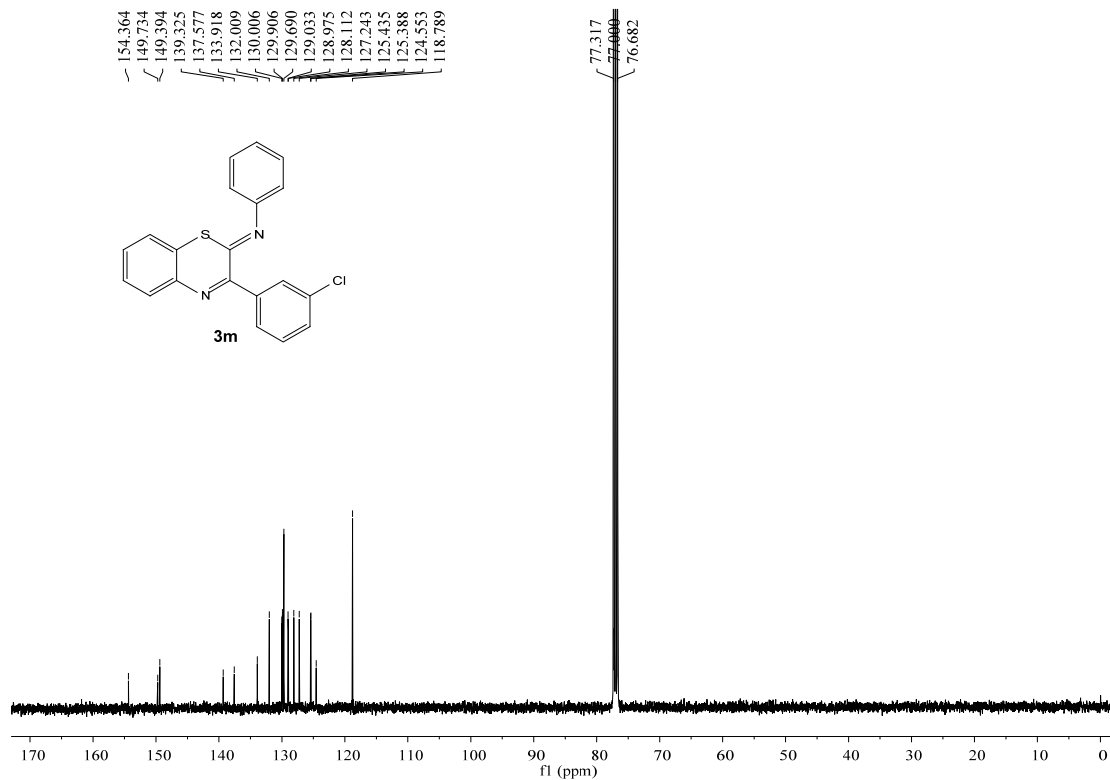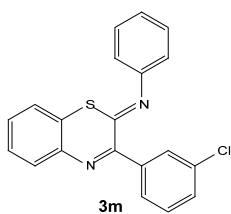

# $^1\text{H}$ and $^{13}\text{C}$ NMR spectra of **3n**

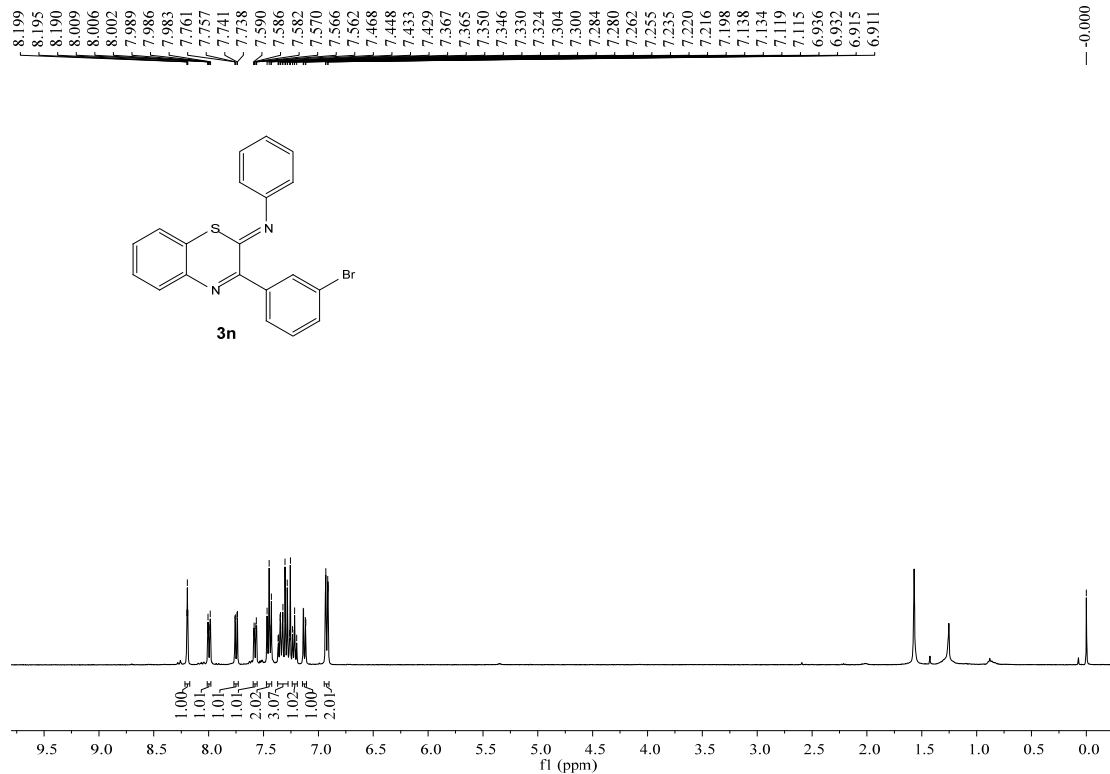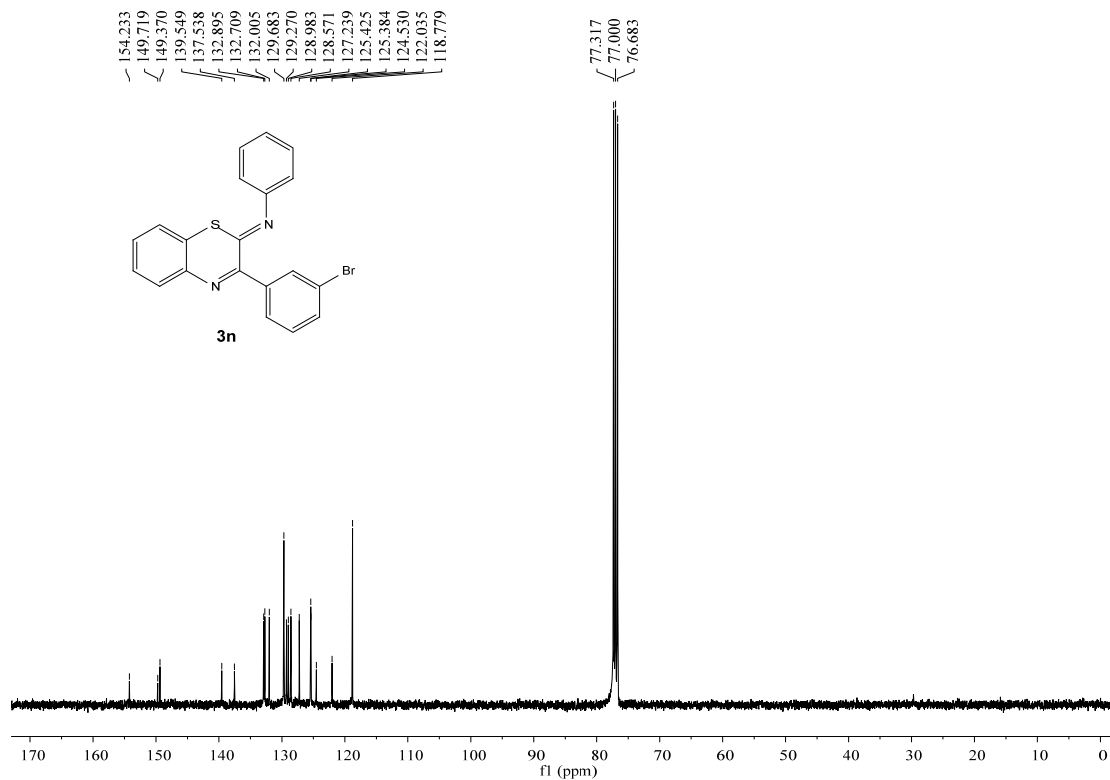

# <sup>1</sup>H, <sup>13</sup>C and <sup>19</sup>F NMR spectra of 3o

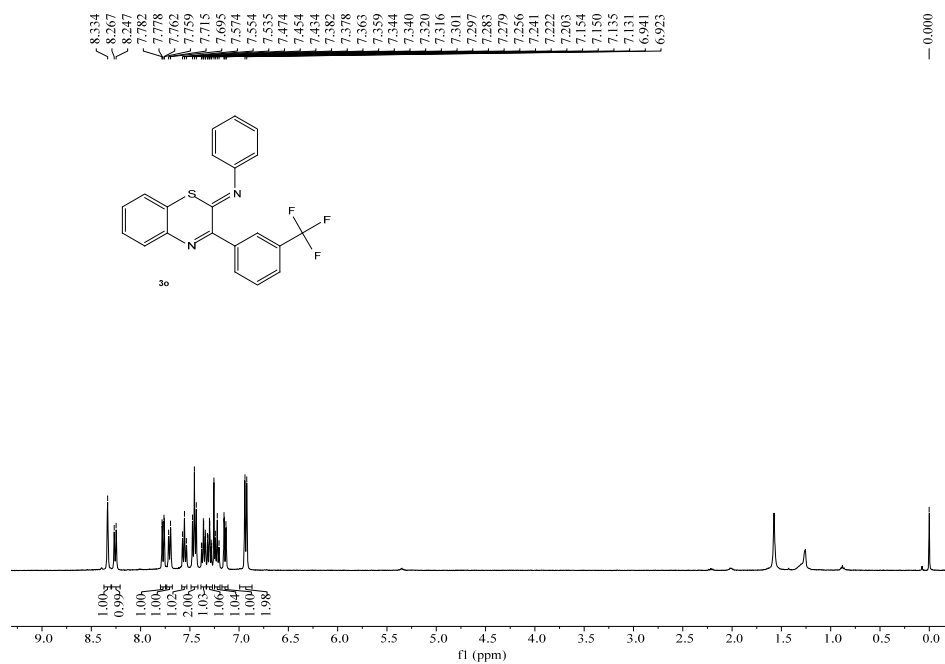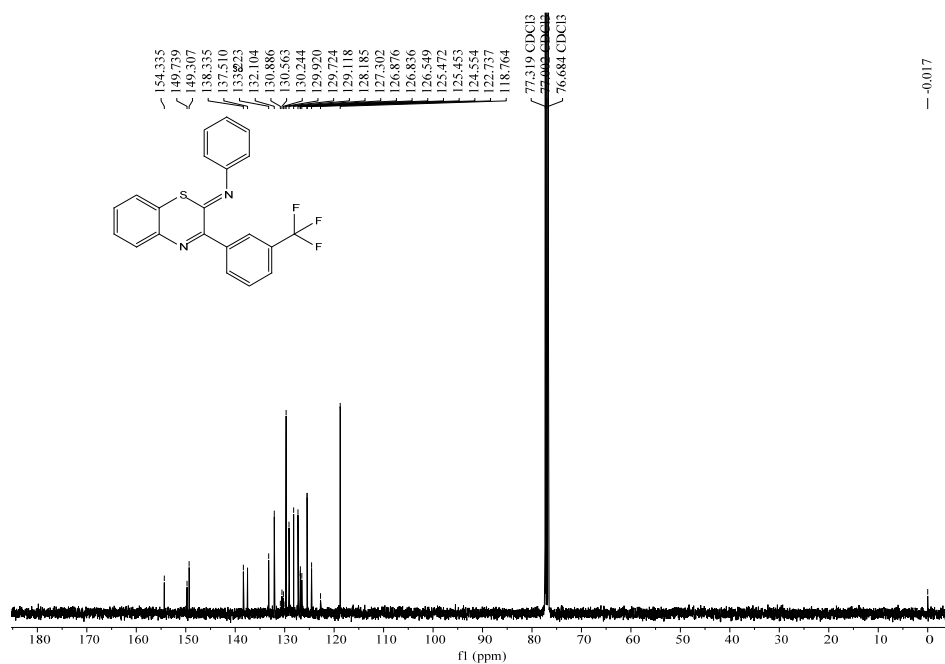

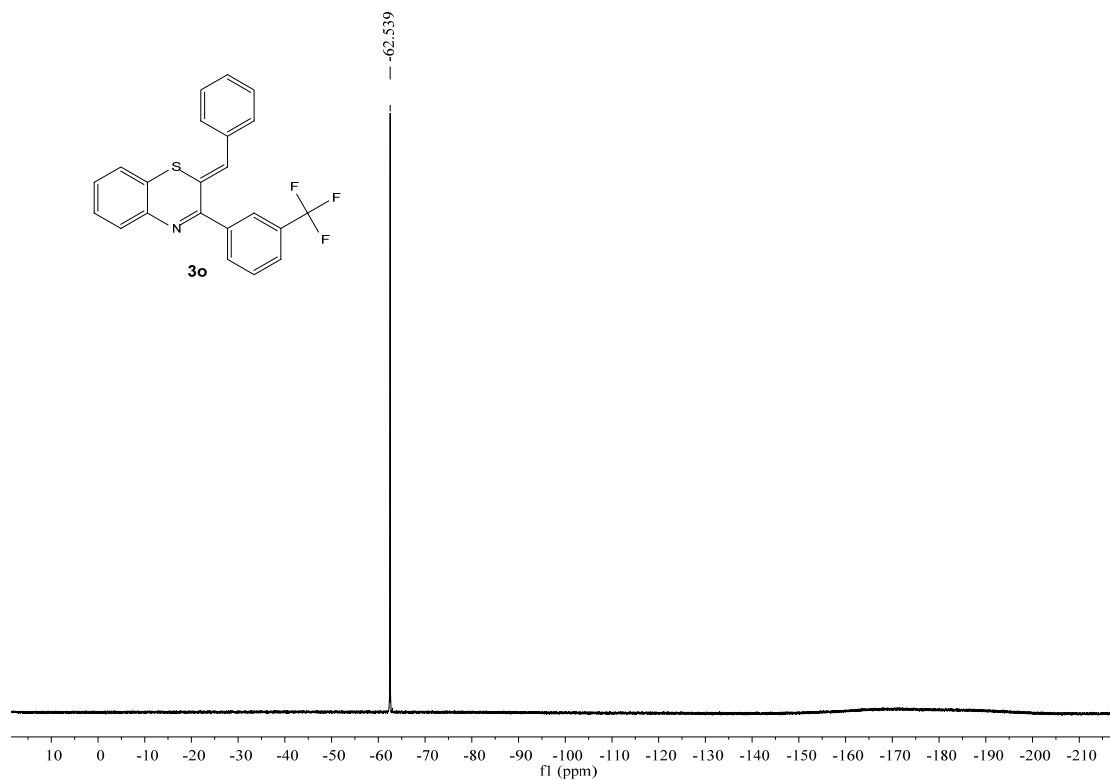

### <sup>1</sup>H and <sup>13</sup>C NMR spectra of **3p**

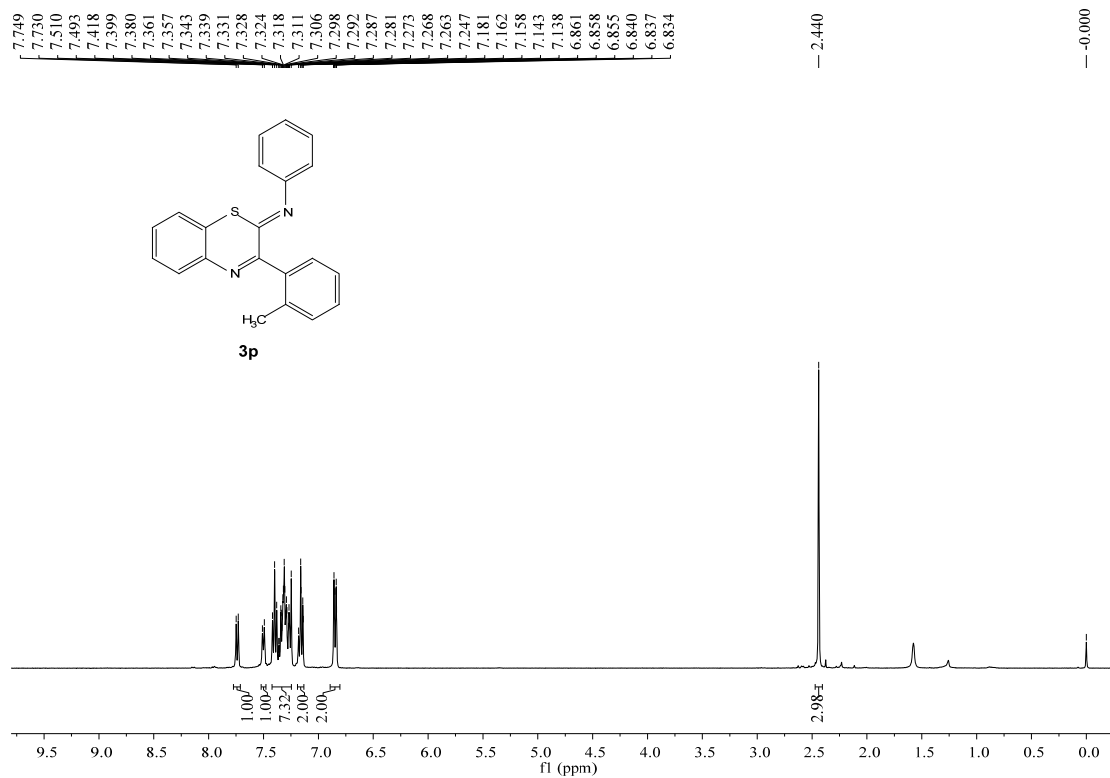



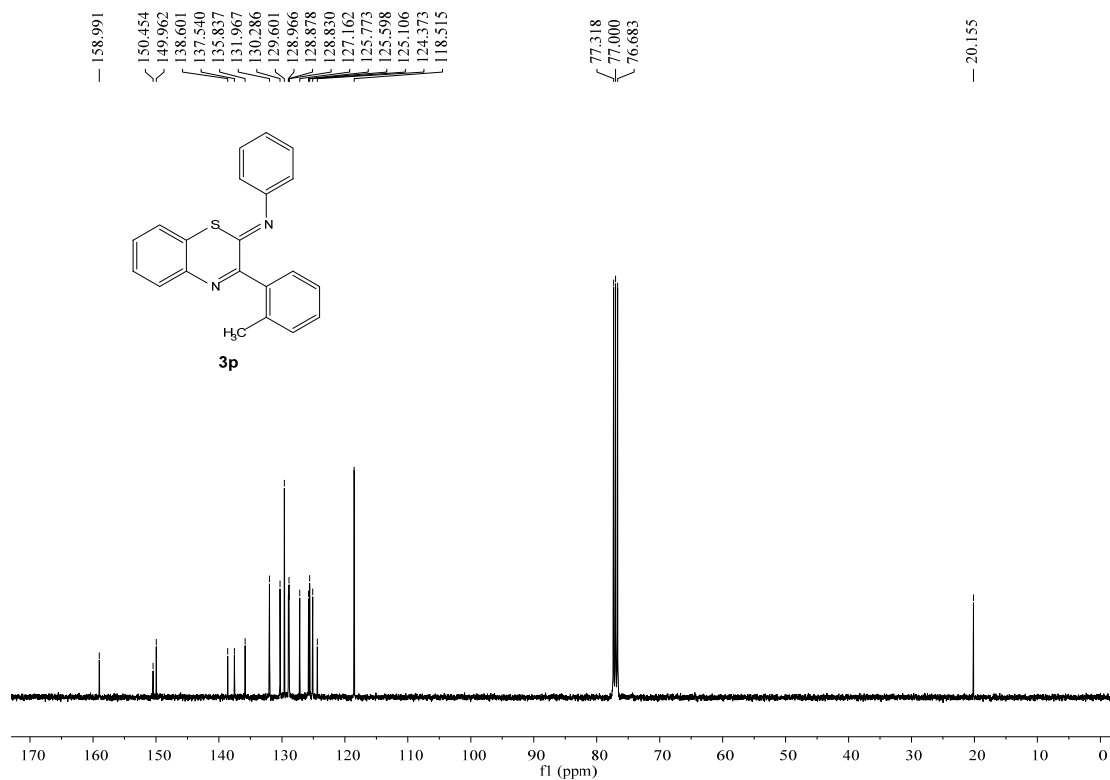

### $^1\text{H}$ and $^{13}\text{C}$ NMR spectra of **3q**

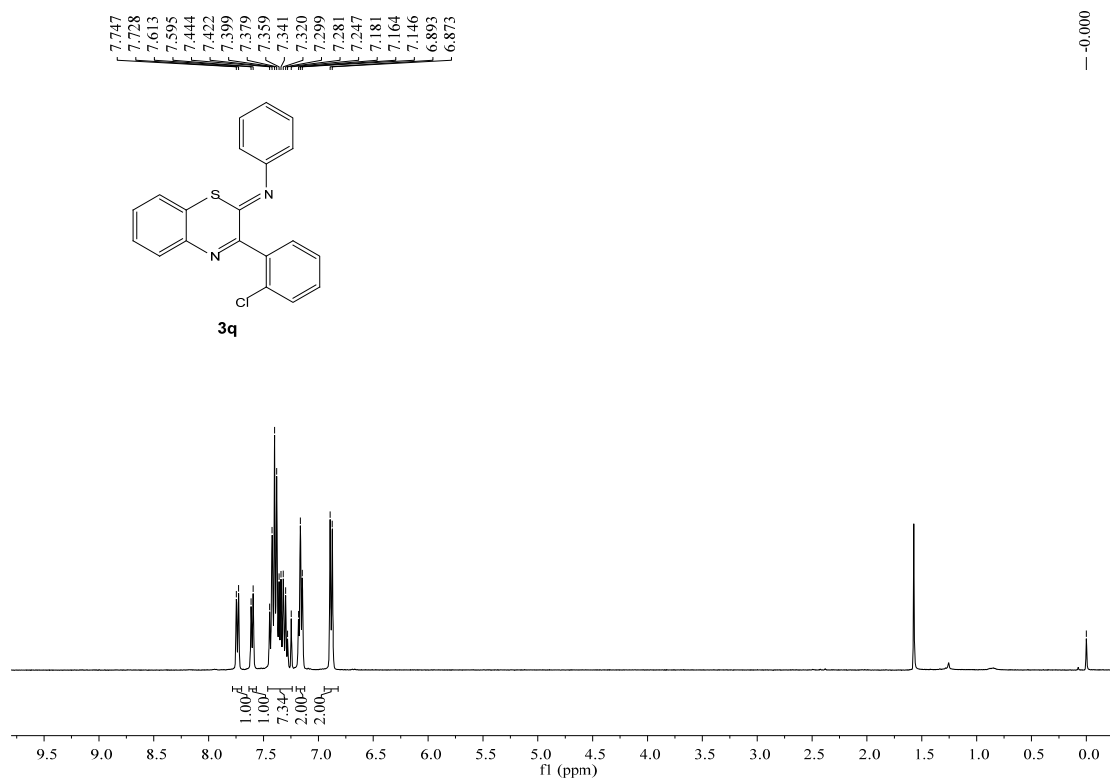

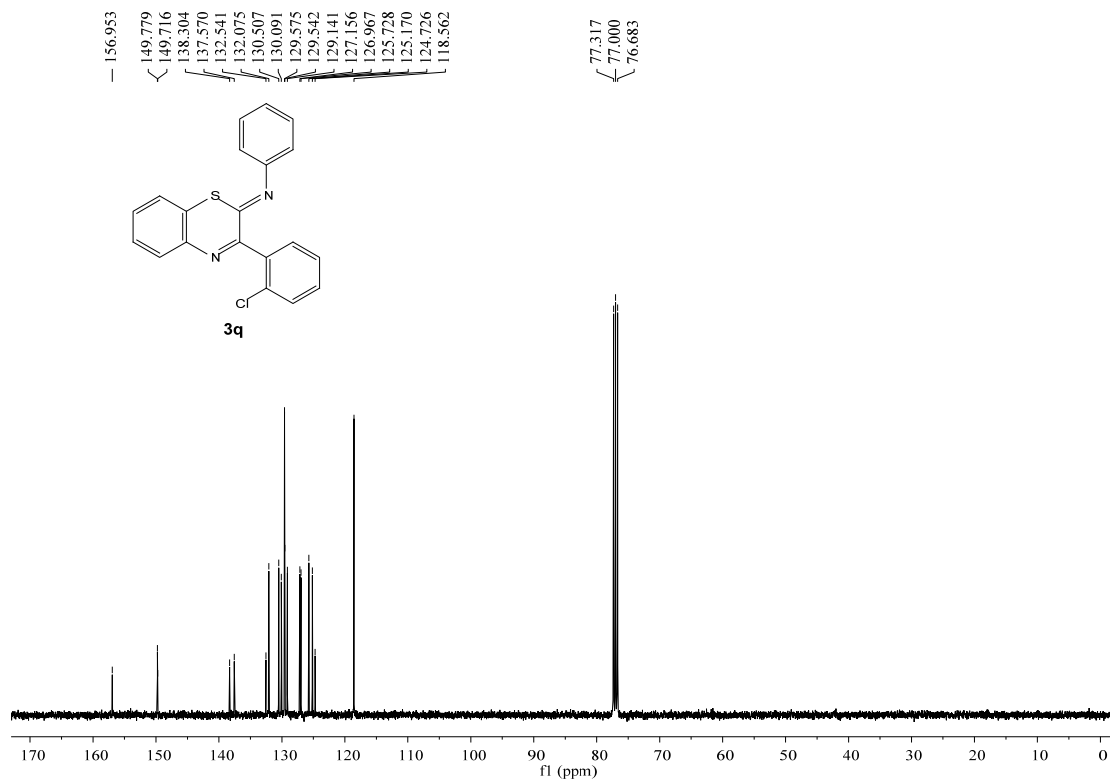

### $^1\text{H}$ and $^{13}\text{C}$ NMR spectra of **3r**

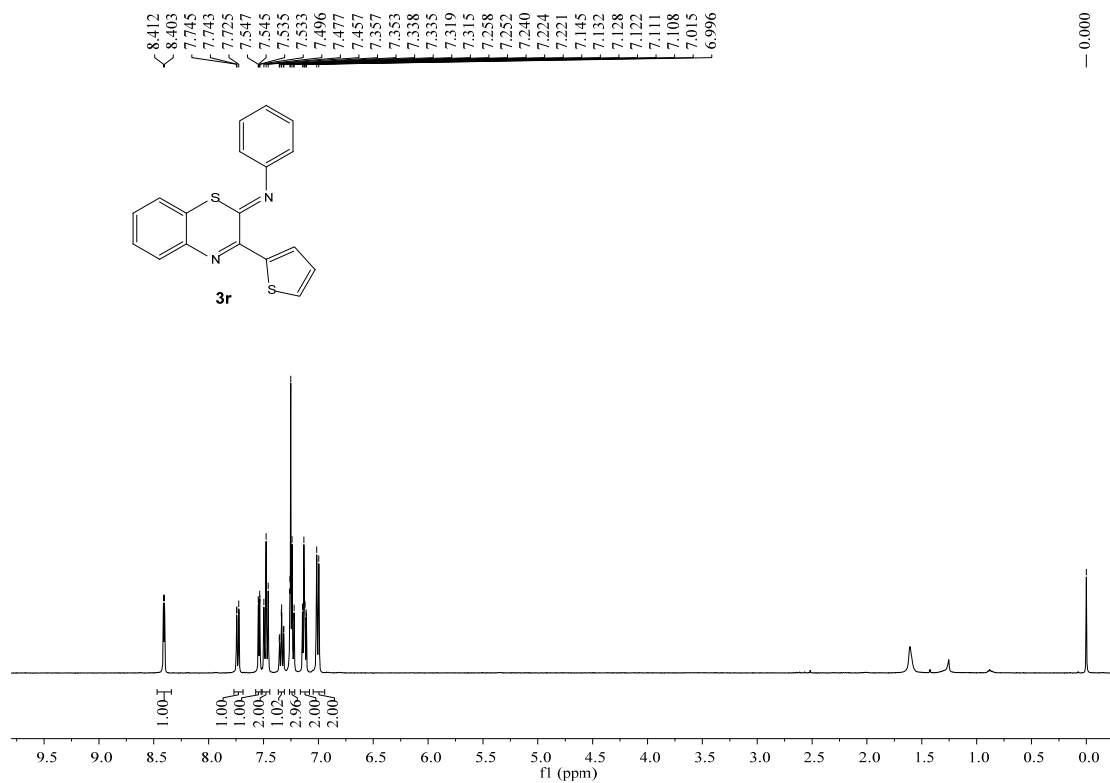

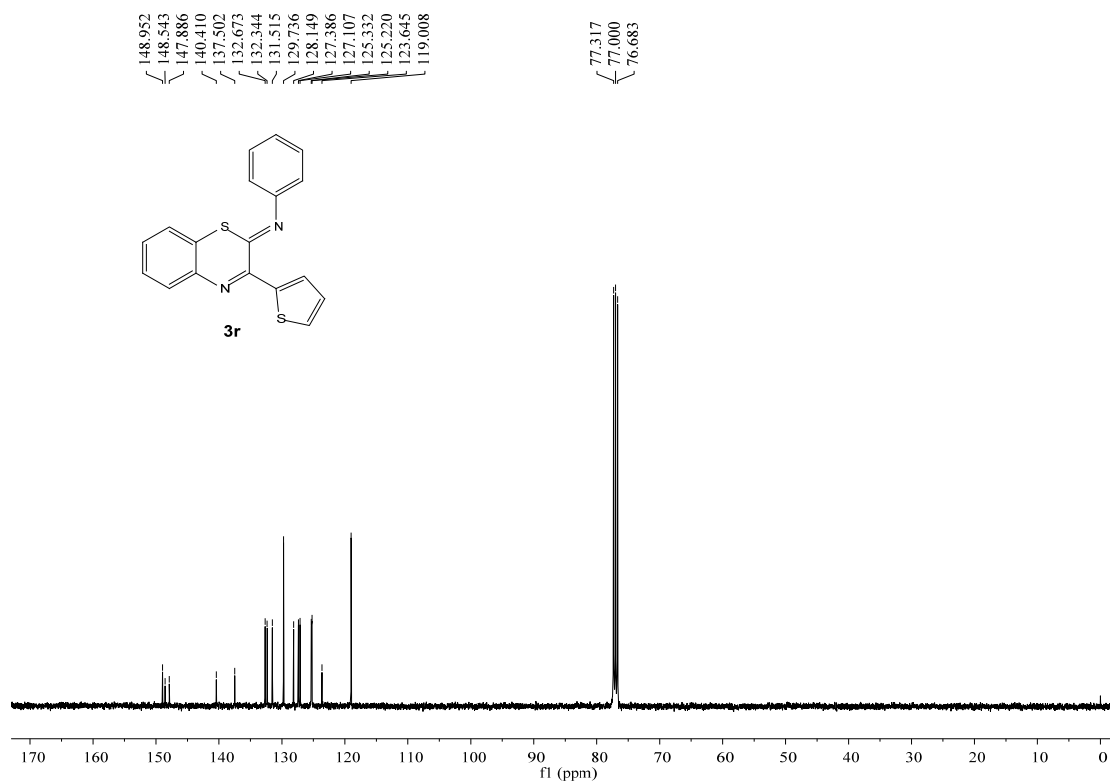

### $^1\text{H}$ and $^{13}\text{C}$ NMR spectra of **3s**

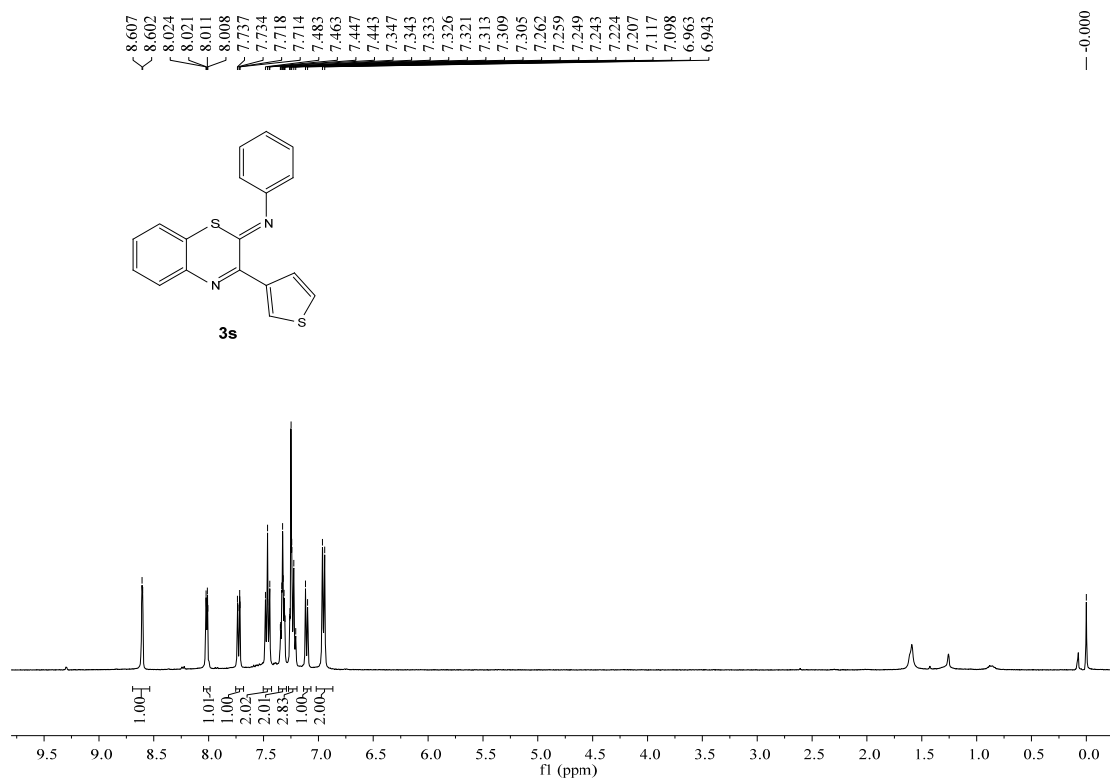

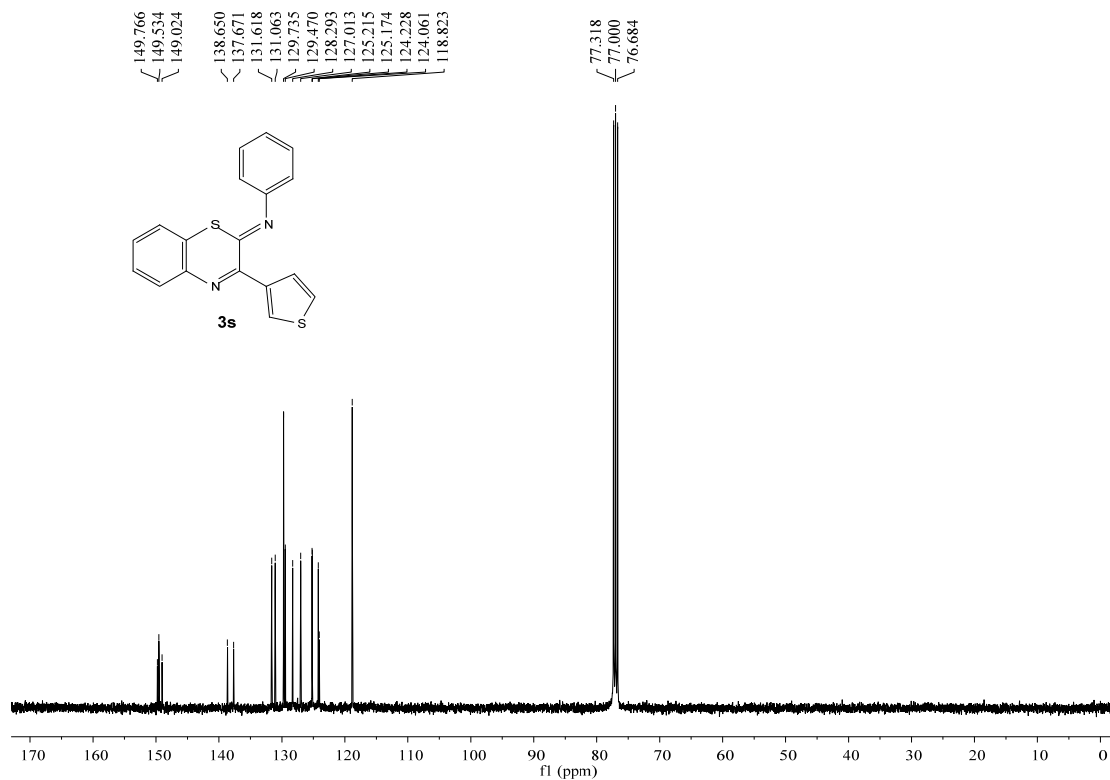

### <sup>1</sup>H and <sup>13</sup>C NMR spectra of **3t**

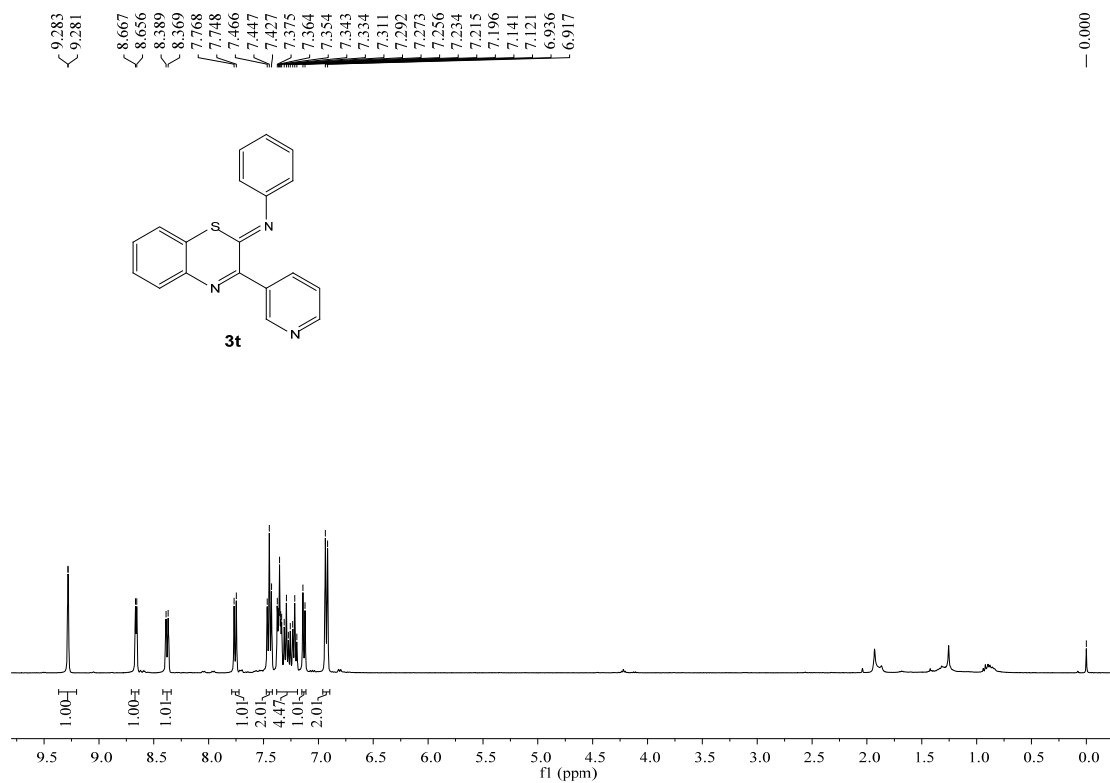

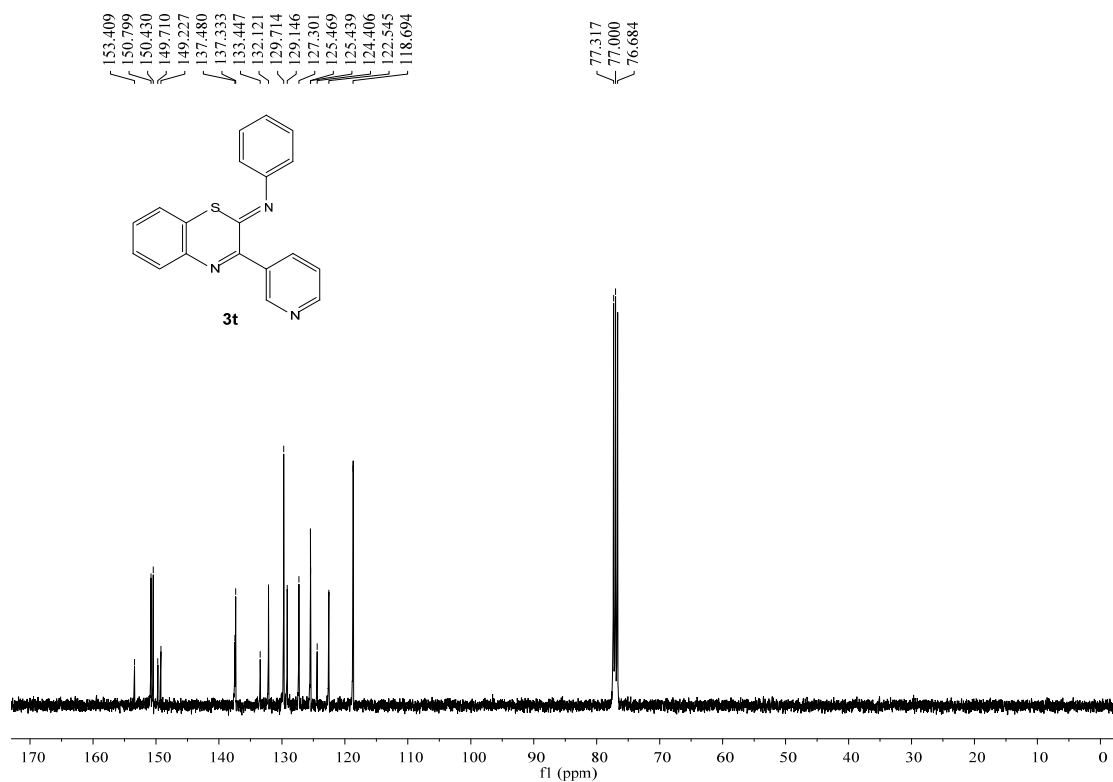

### $^1\text{H}$ and $^{13}\text{C}$ NMR spectra of 3u

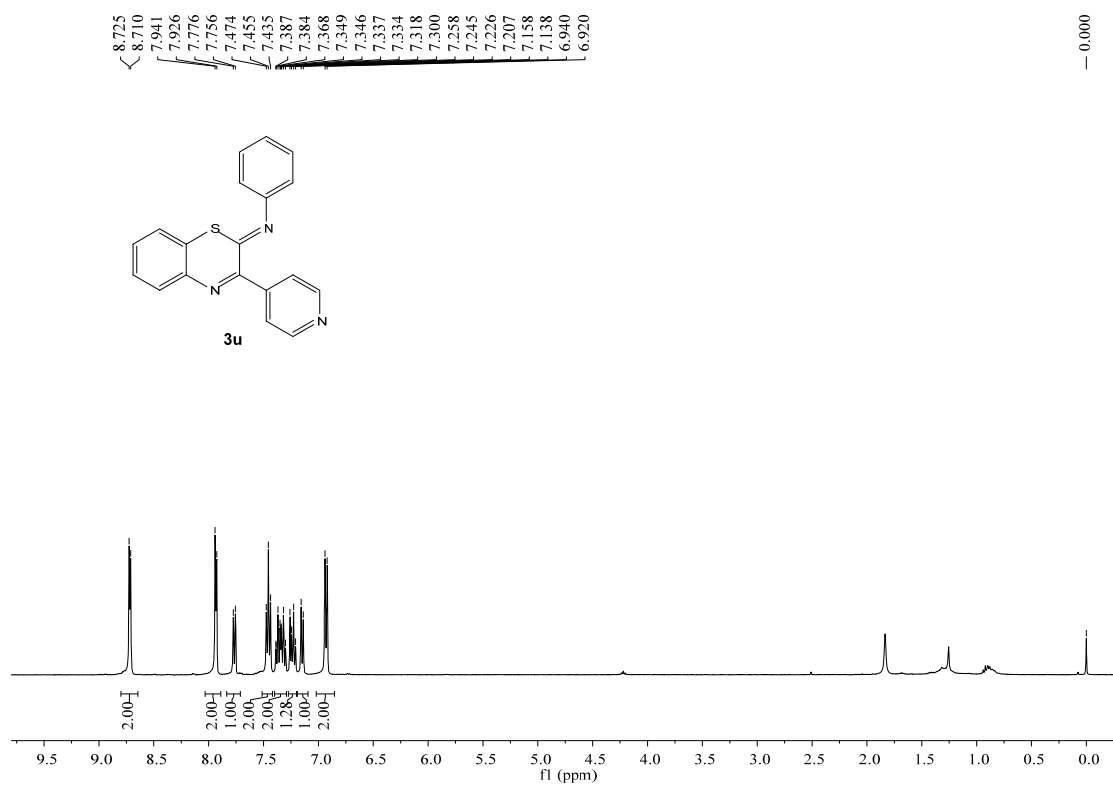

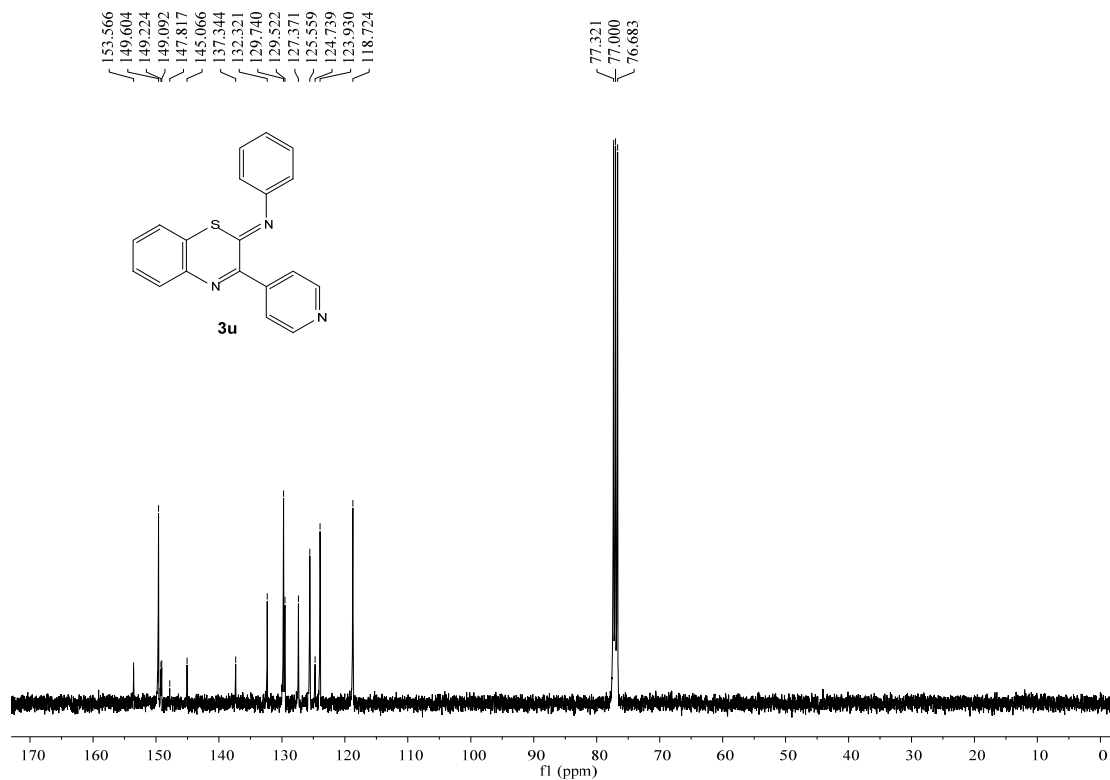

### <sup>1</sup>H and <sup>13</sup>C NMR spectra of 3v

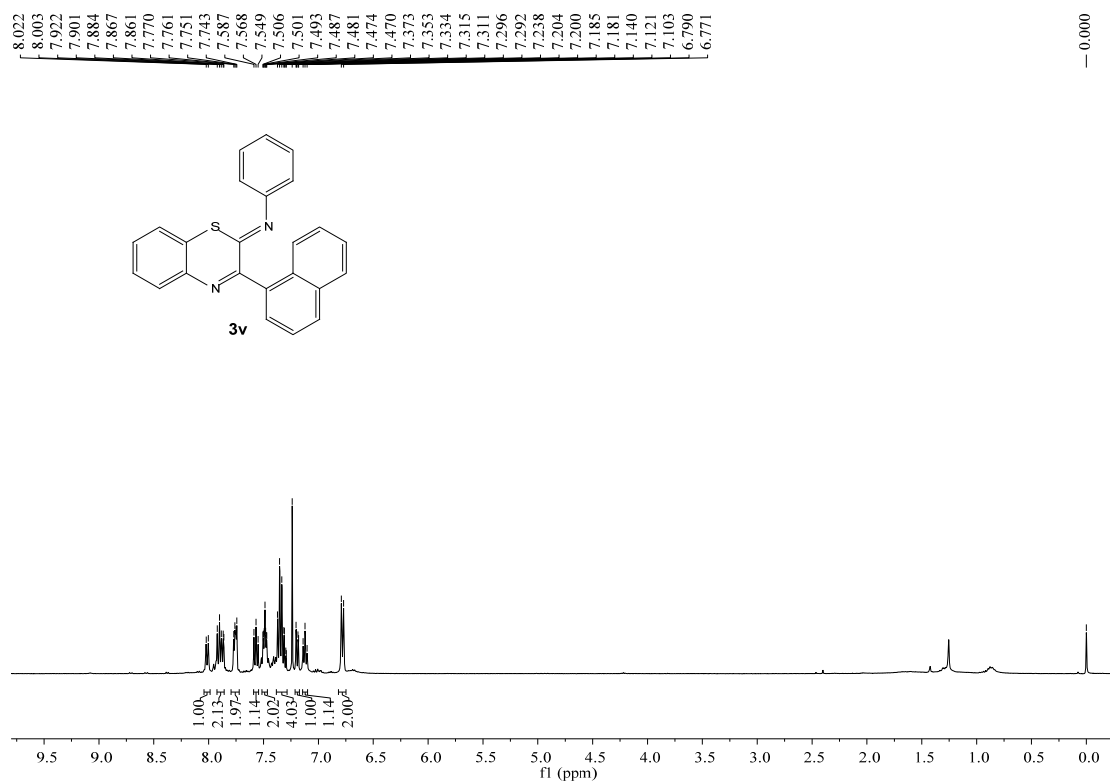

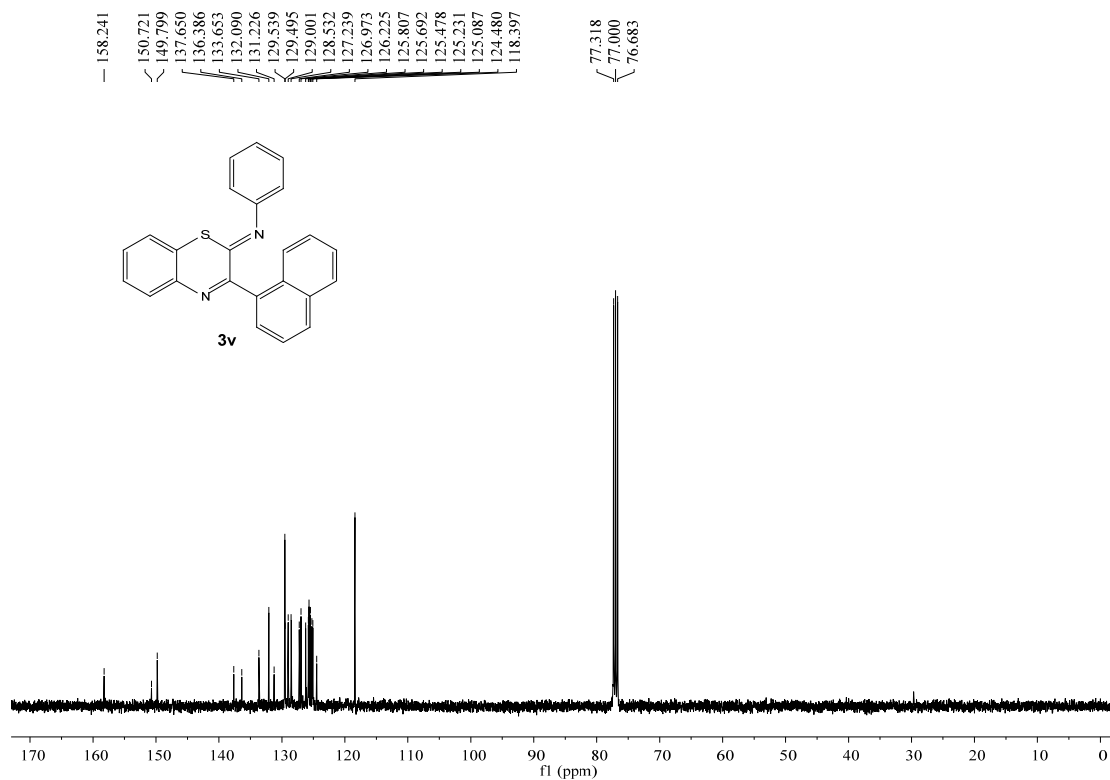

**<sup>1</sup>H and <sup>13</sup>C NMR spectra of 3w**

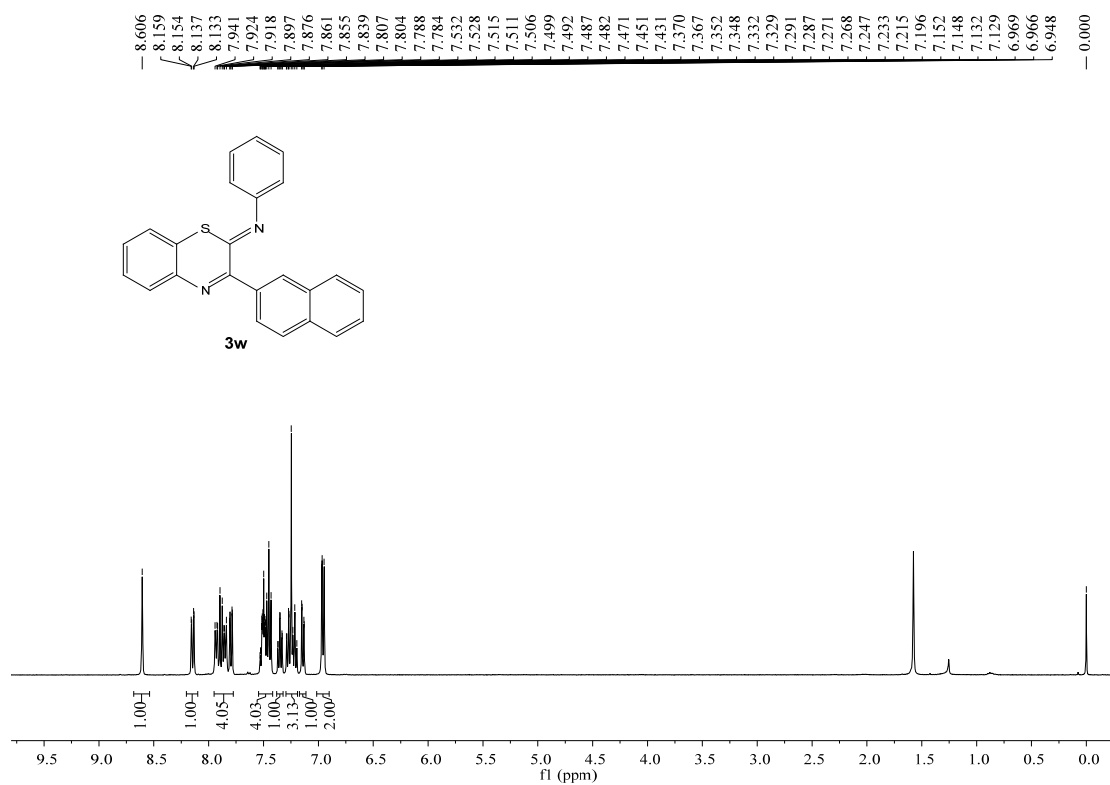

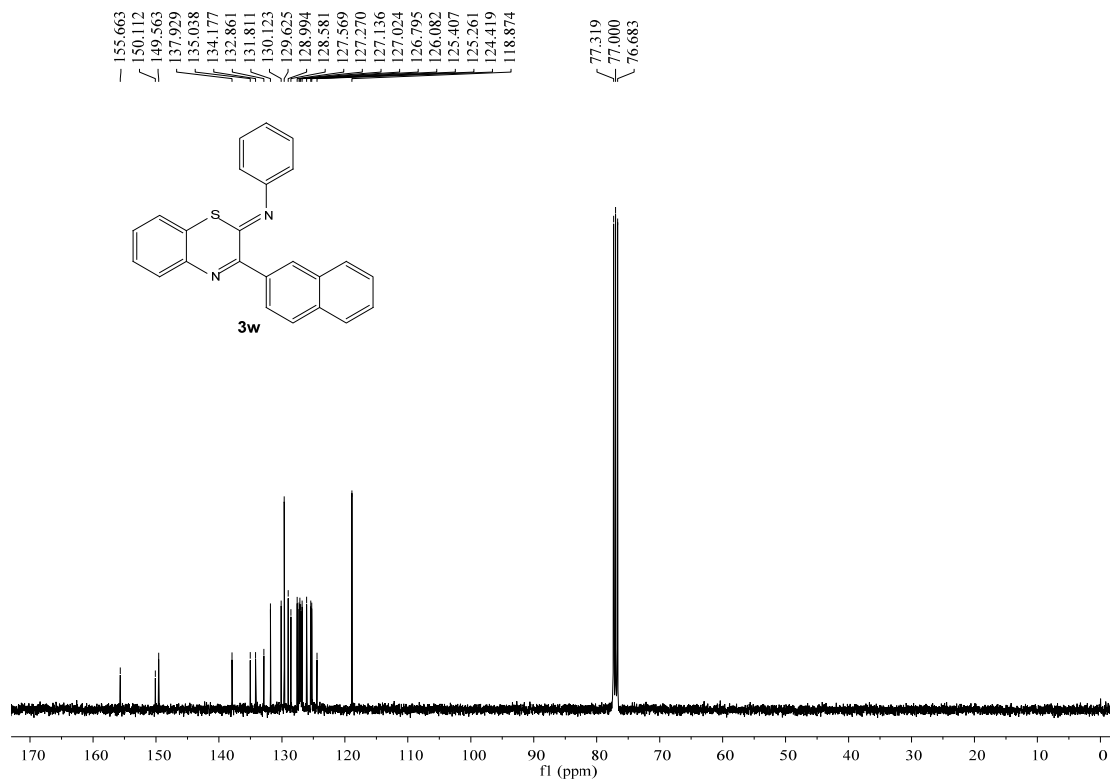

### <sup>1</sup>H and <sup>13</sup>C NMR spectra of **3x**

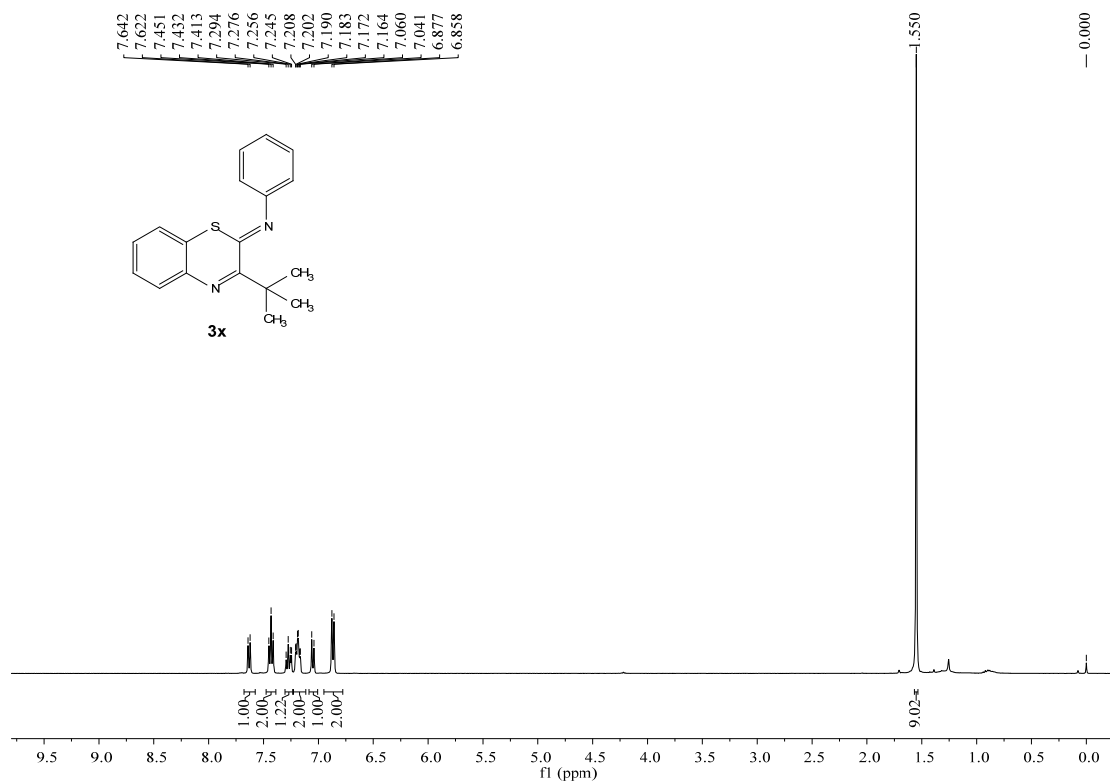



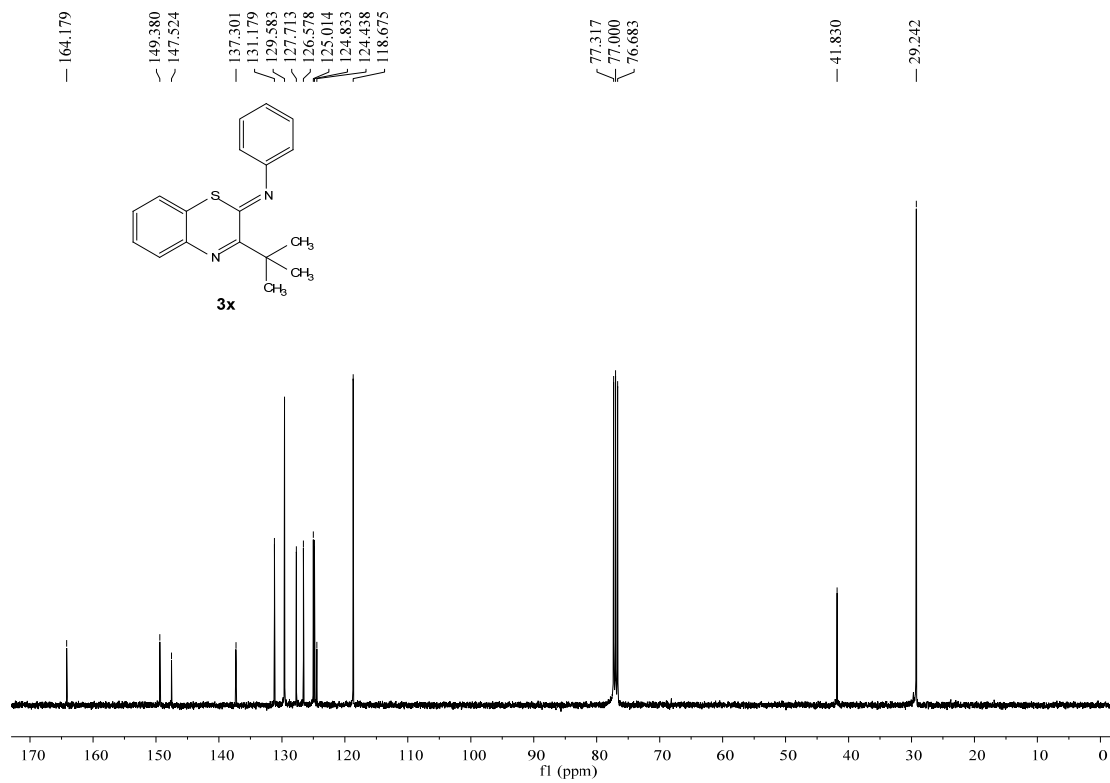

**<sup>1</sup>H and <sup>13</sup>C NMR spectra of 4a**

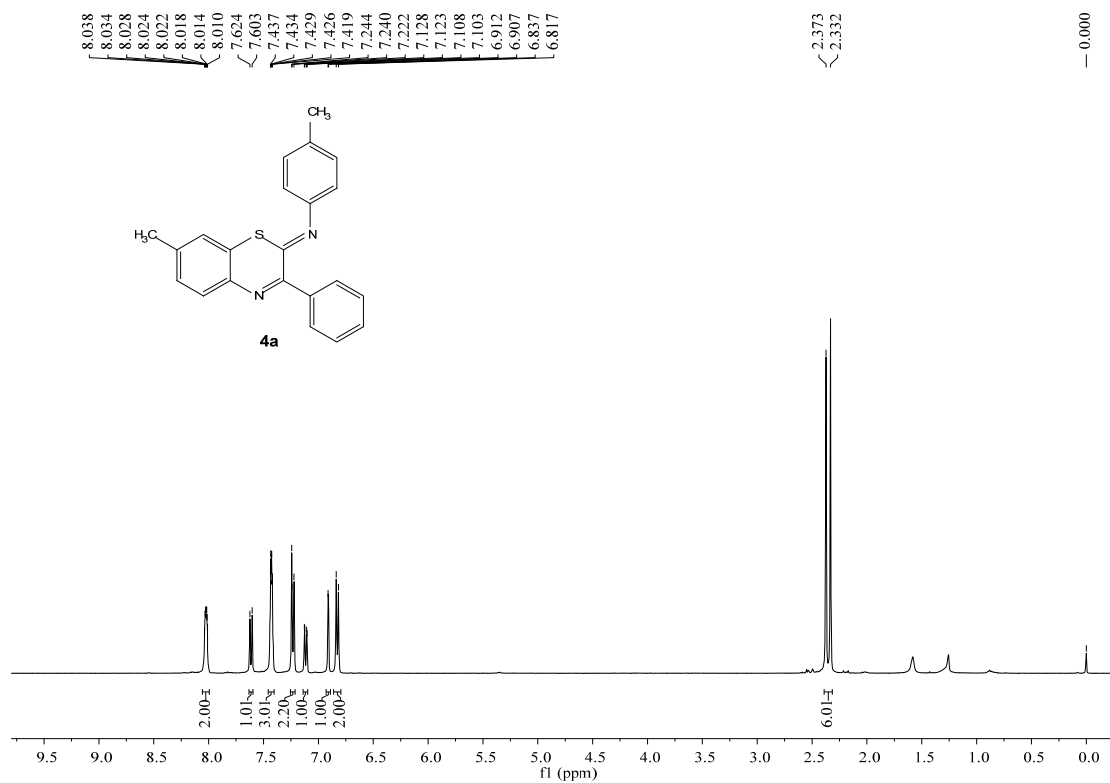

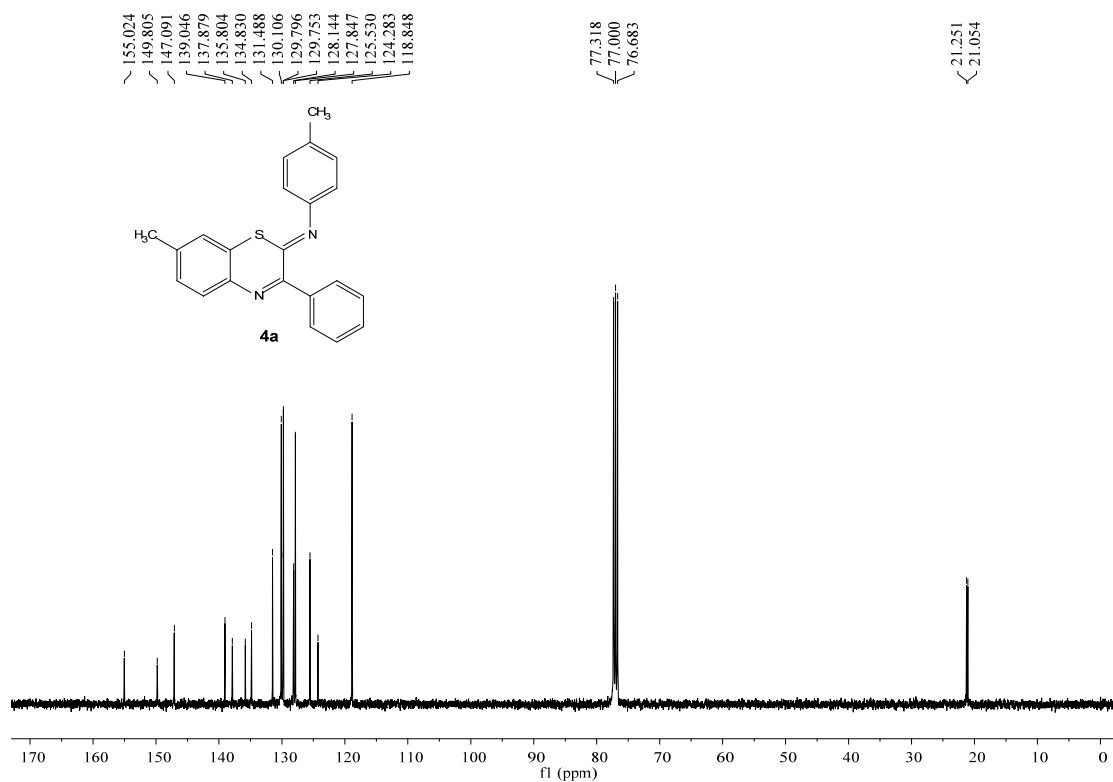

**<sup>1</sup>H and <sup>13</sup>C NMR spectra of 4b**

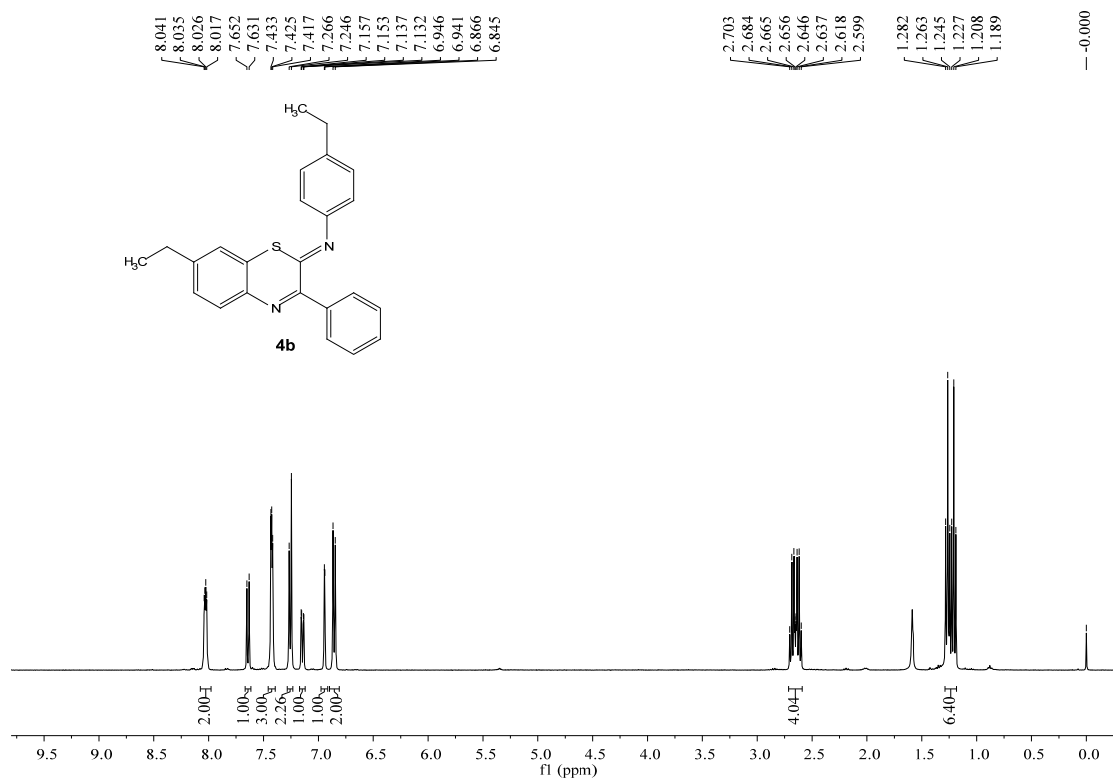

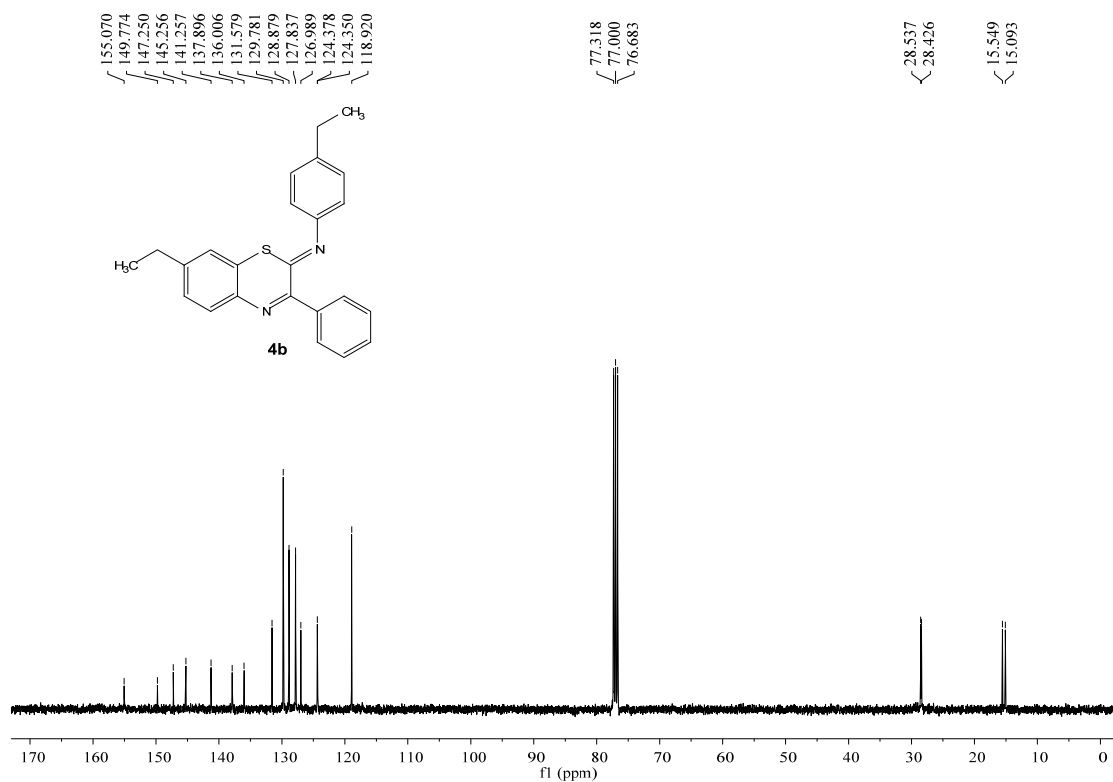

**<sup>1</sup>H and <sup>13</sup>C NMR spectra of 4c**

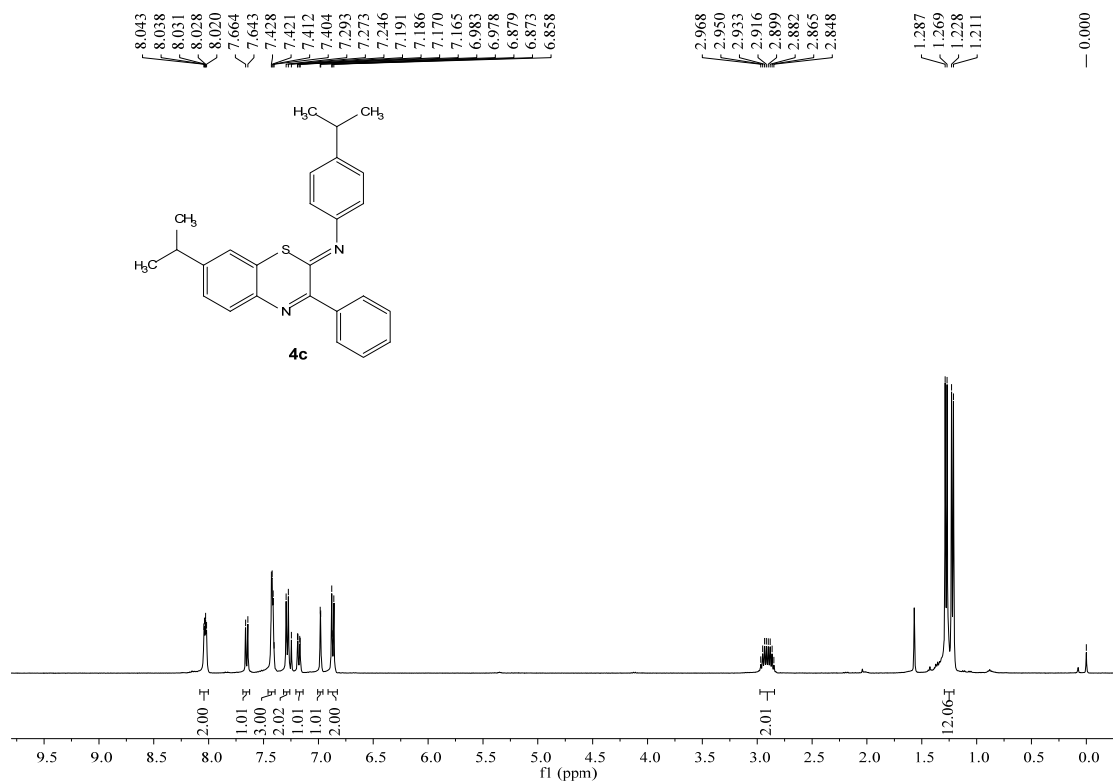

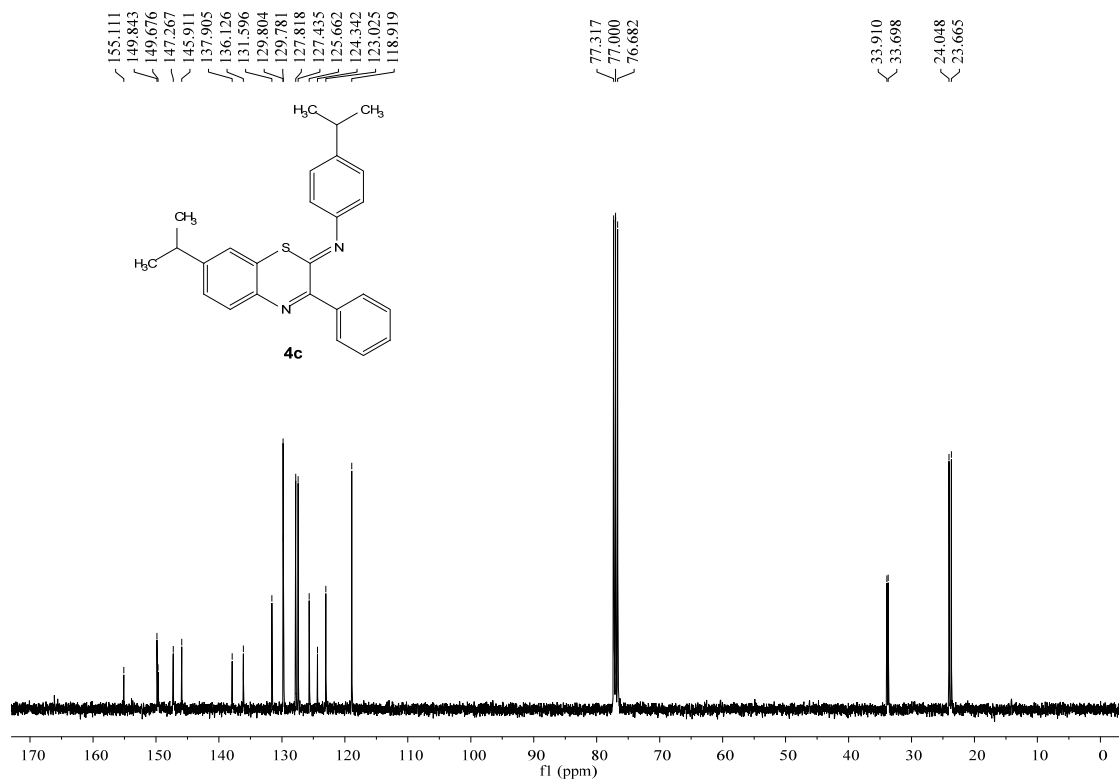

### <sup>1</sup>H and <sup>13</sup>C NMR spectra of **4d**

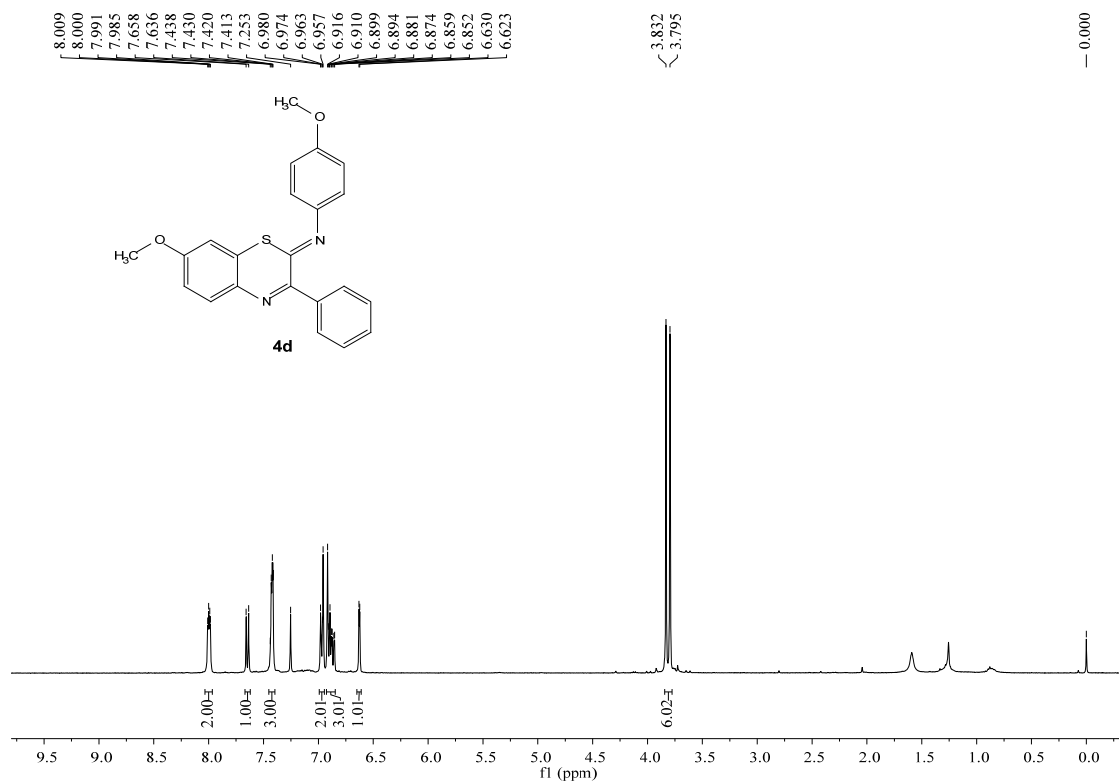



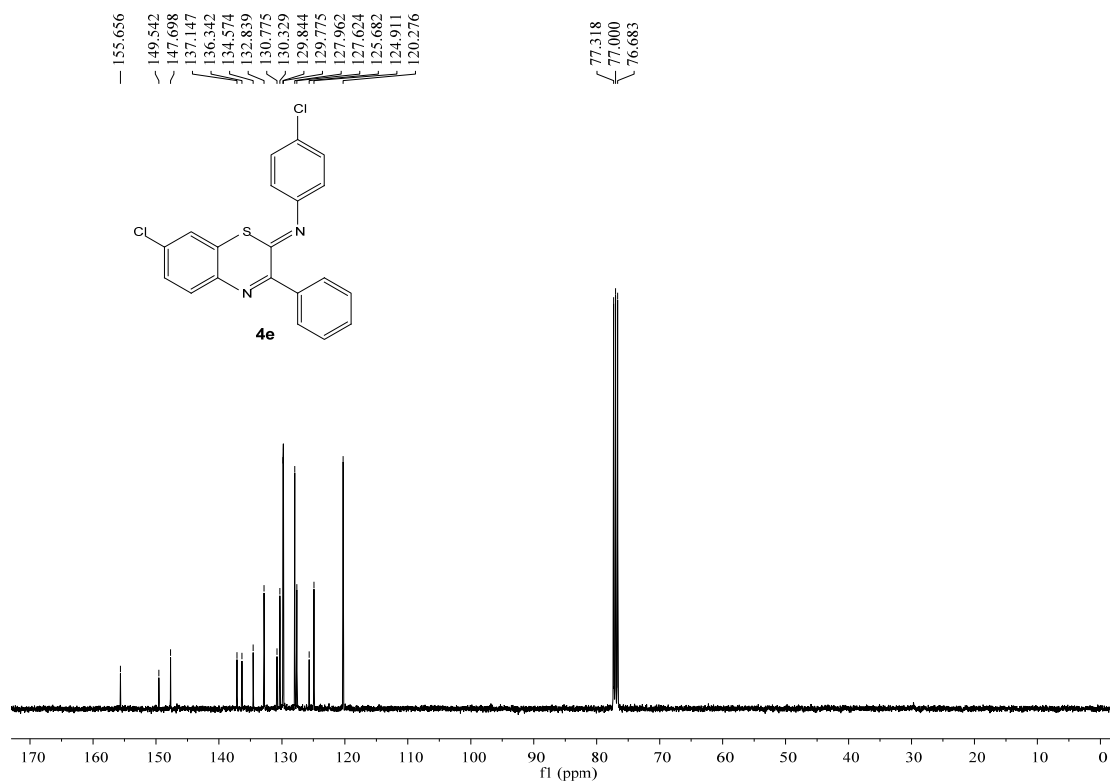

### <sup>1</sup>H and <sup>13</sup>C NMR spectra of **4f**

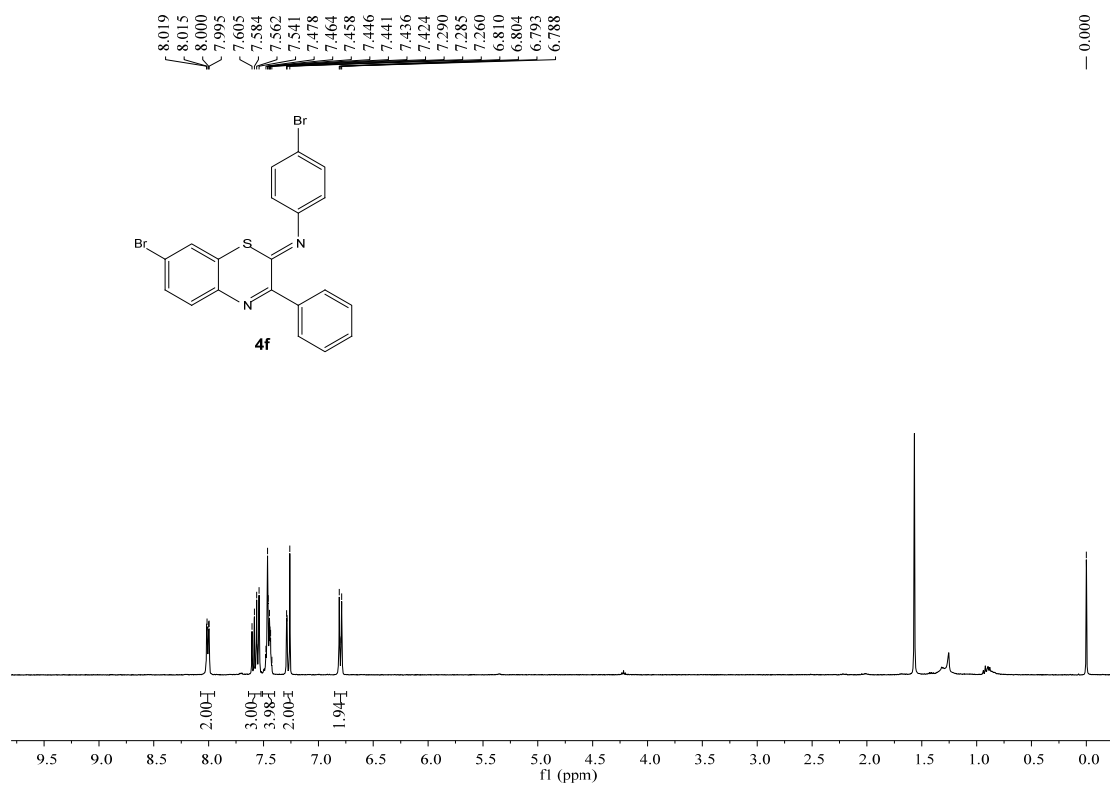

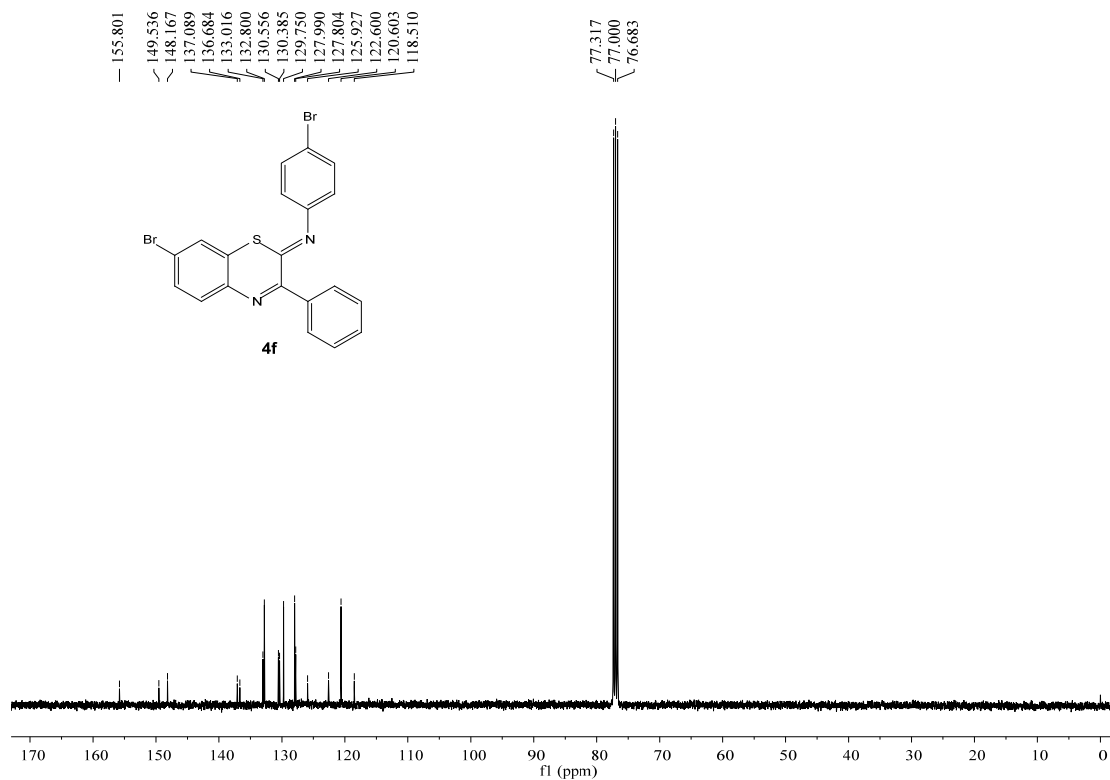

### <sup>1</sup>H and <sup>13</sup>C NMR spectra of **4g+4g'**

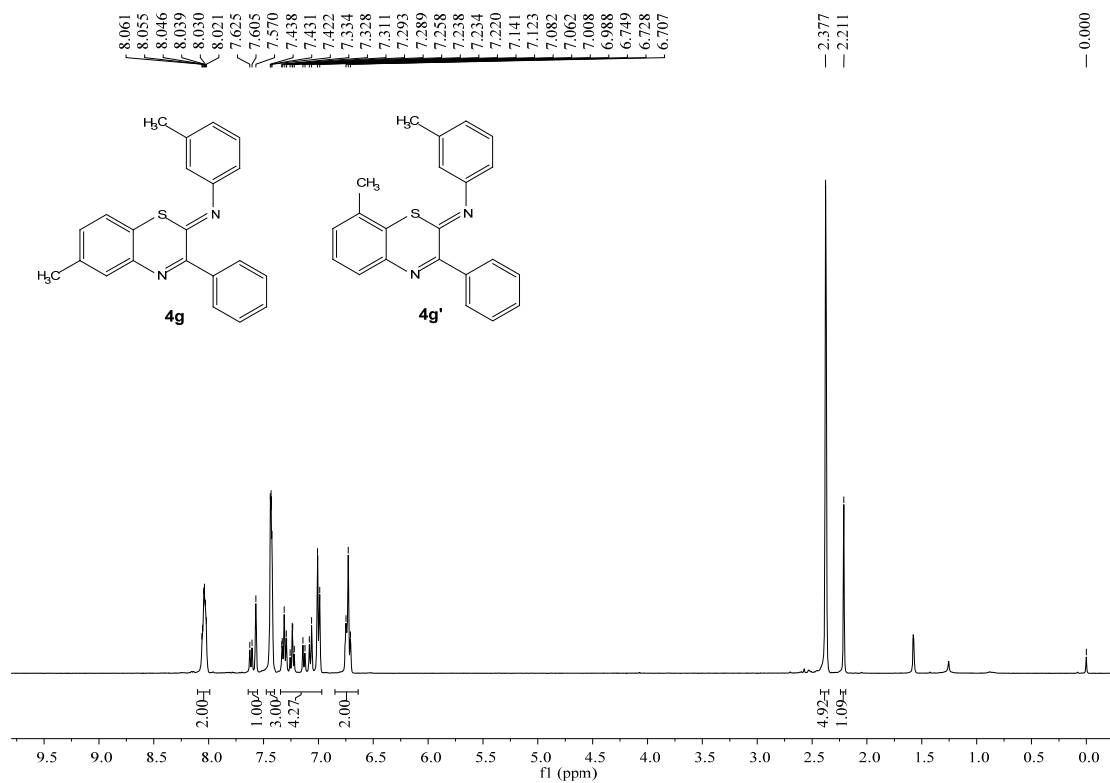

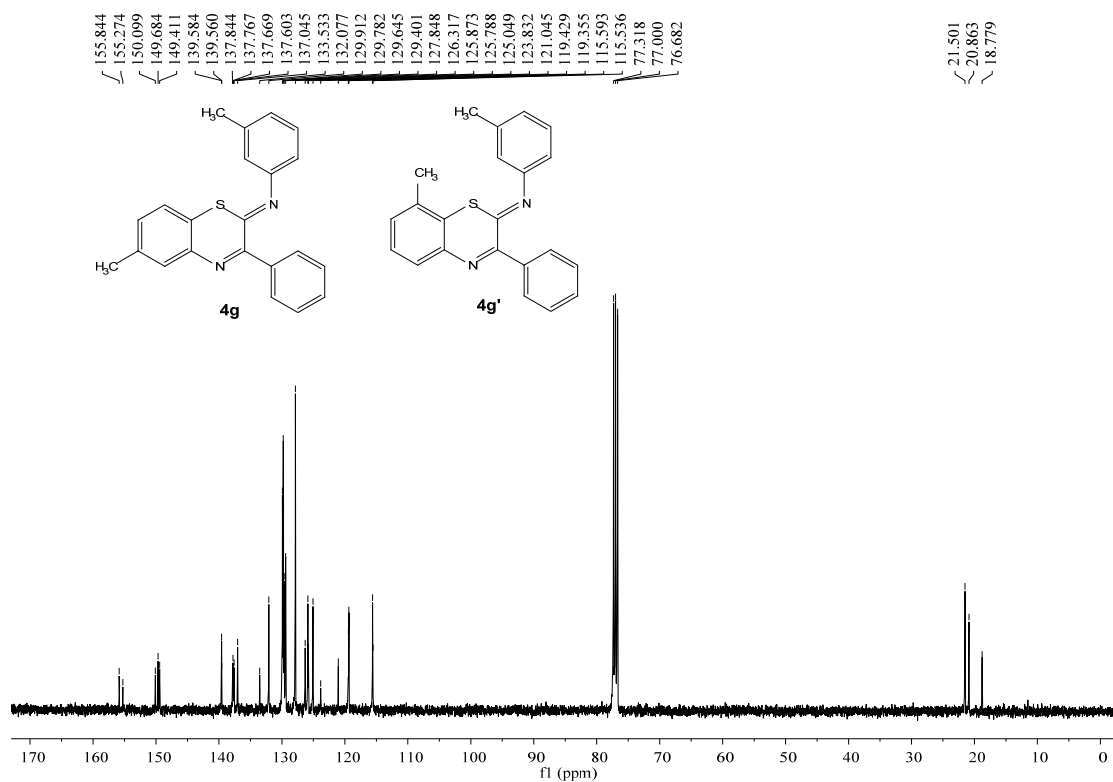

### <sup>1</sup>H and <sup>13</sup>C NMR spectra of 4h

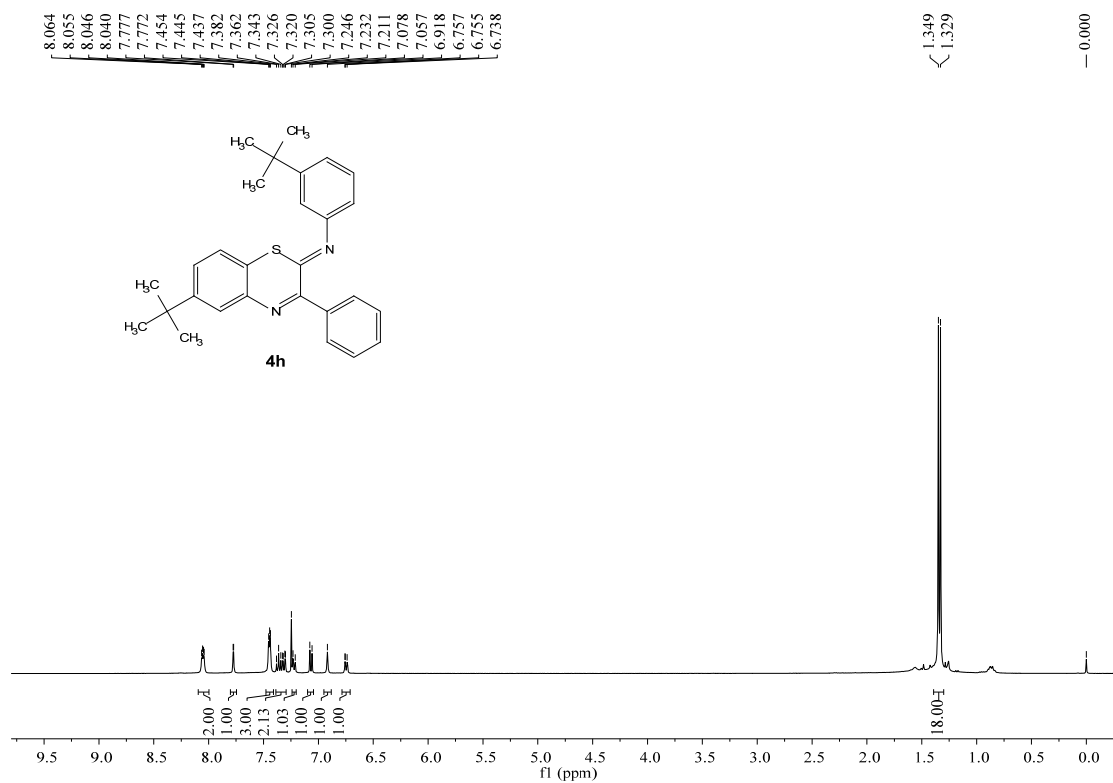



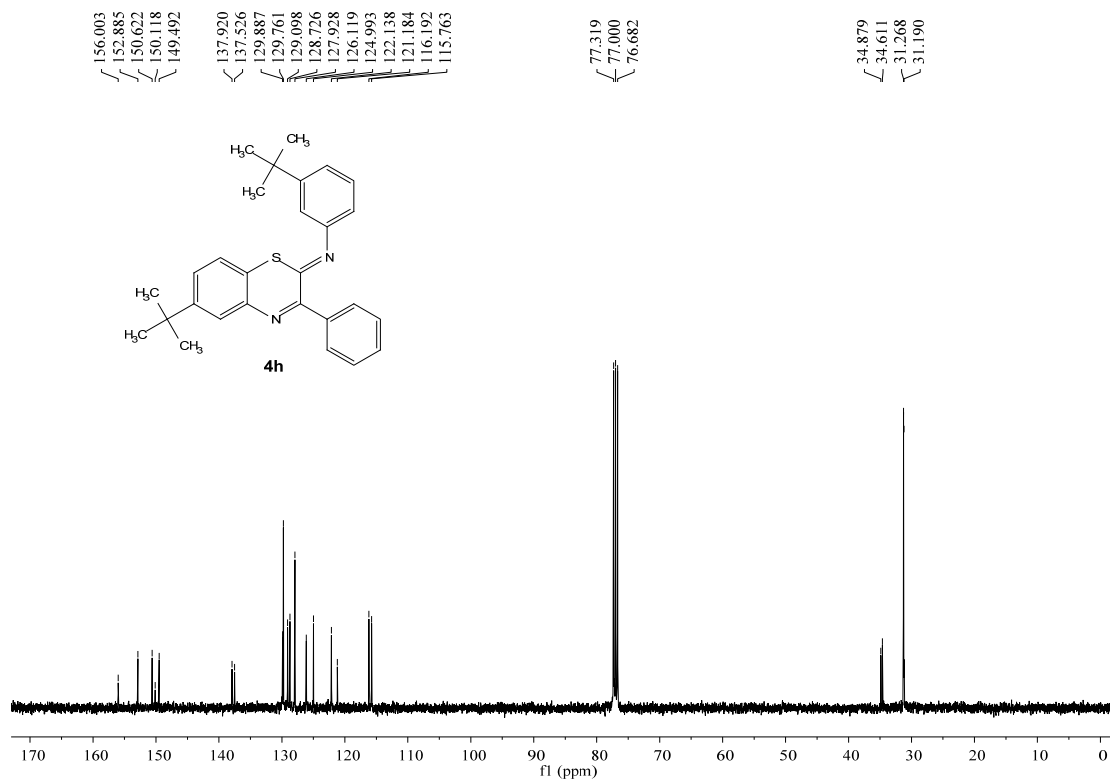

### <sup>1</sup>H and <sup>13</sup>C NMR spectra of 4i+4i'

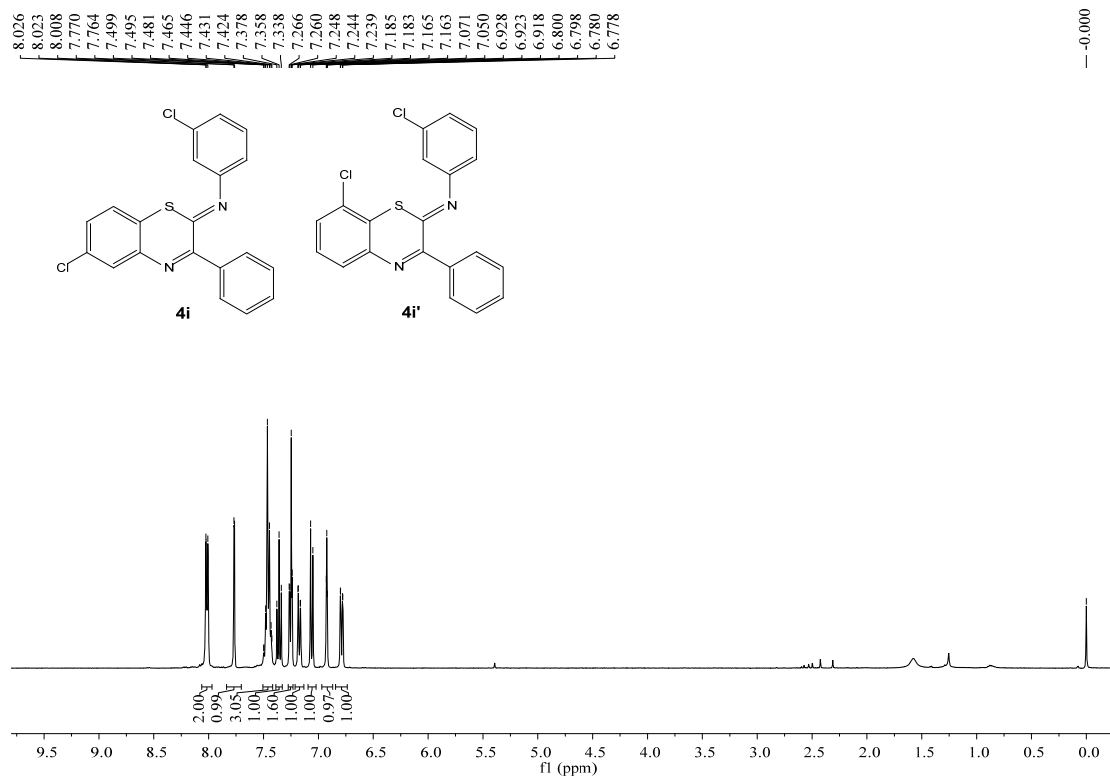

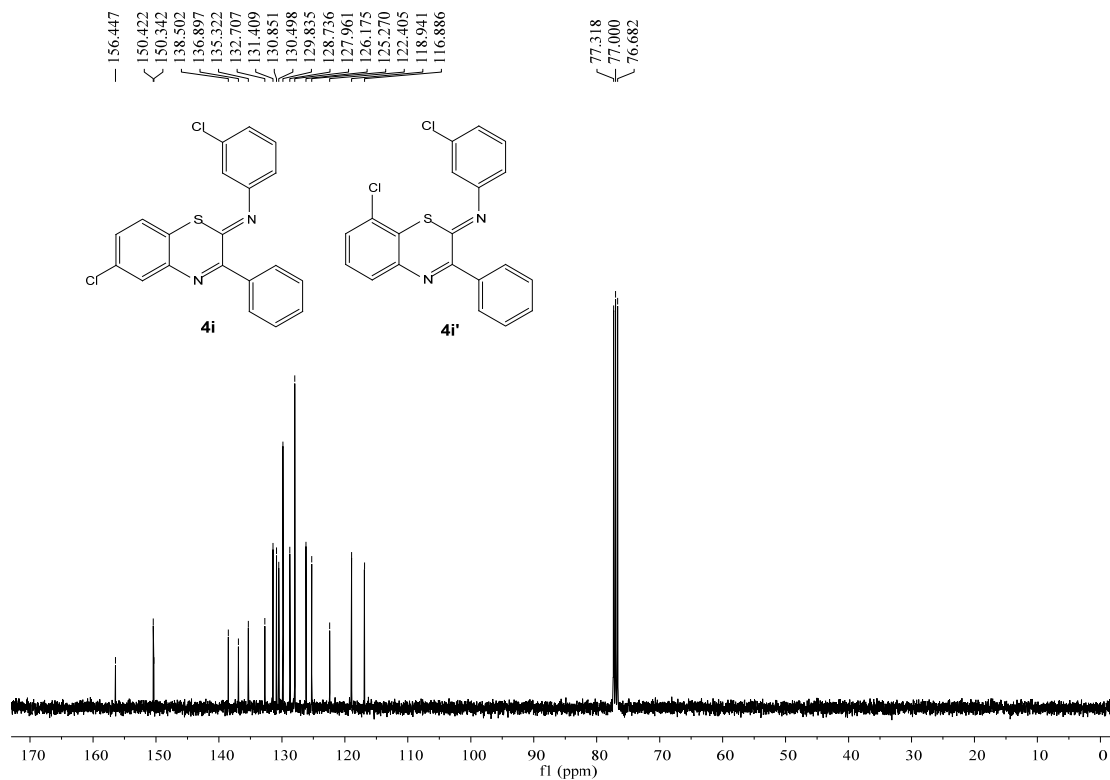

### <sup>1</sup>H and <sup>13</sup>C NMR spectra of 4j+4j'

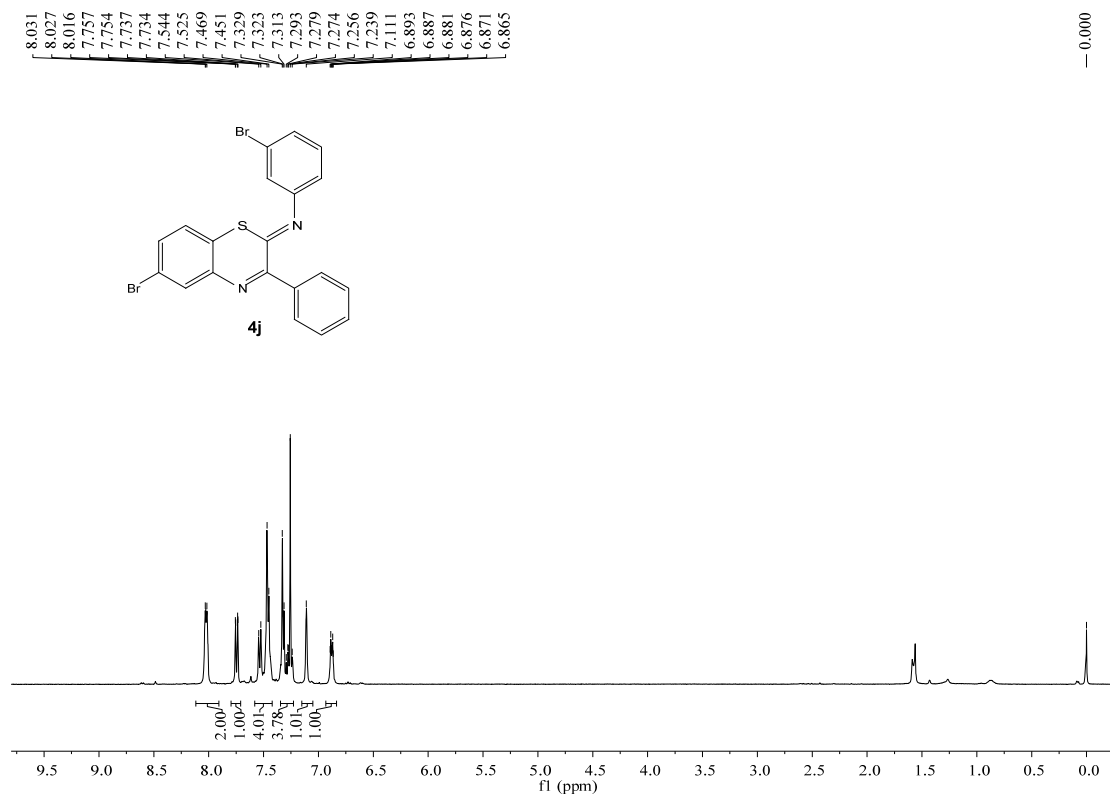

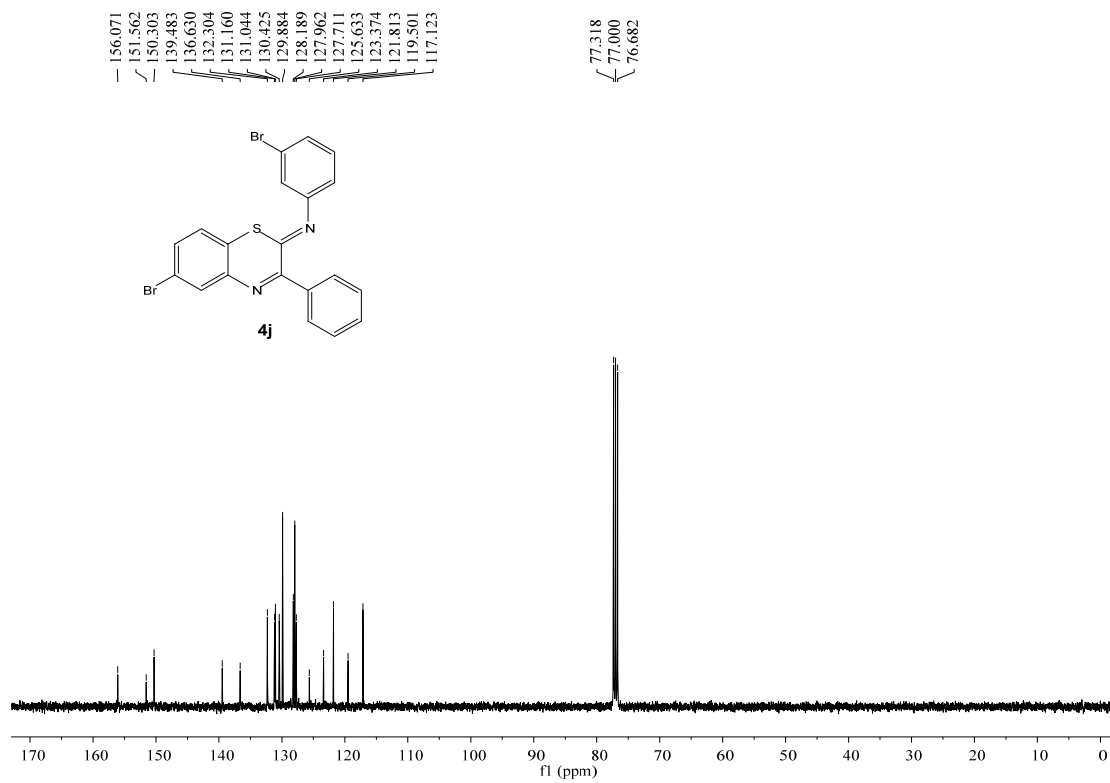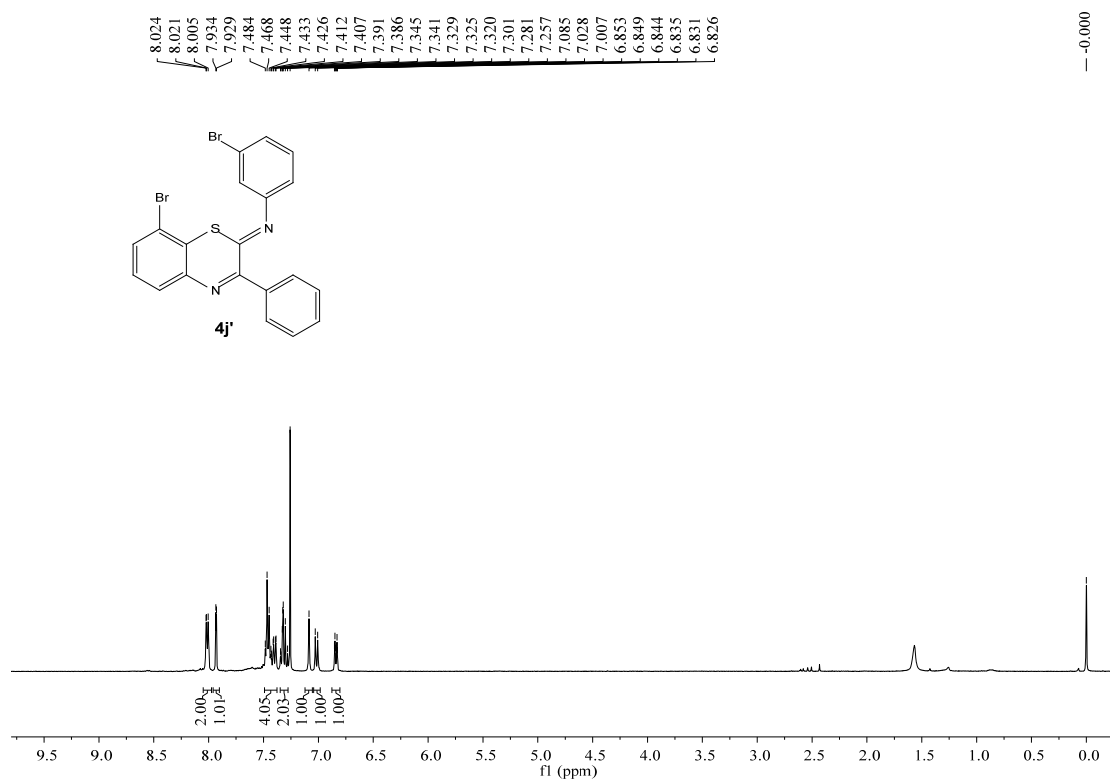

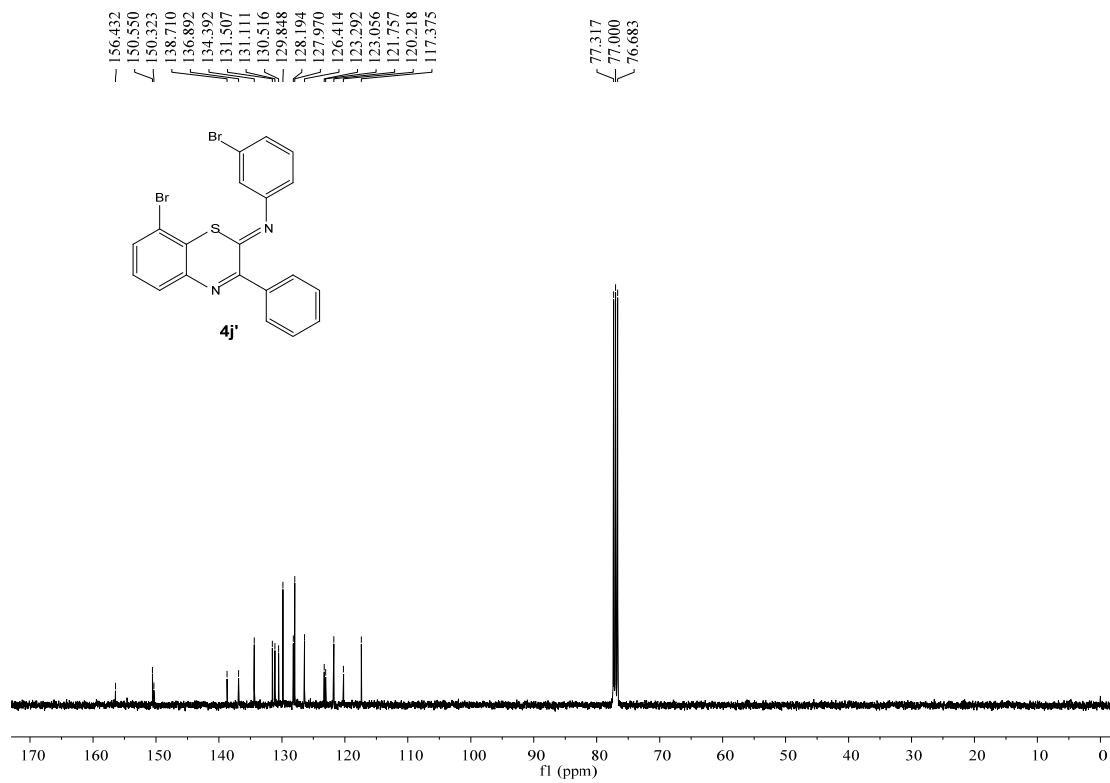

**<sup>1</sup>H and <sup>13</sup>C NMR spectra of 4k**

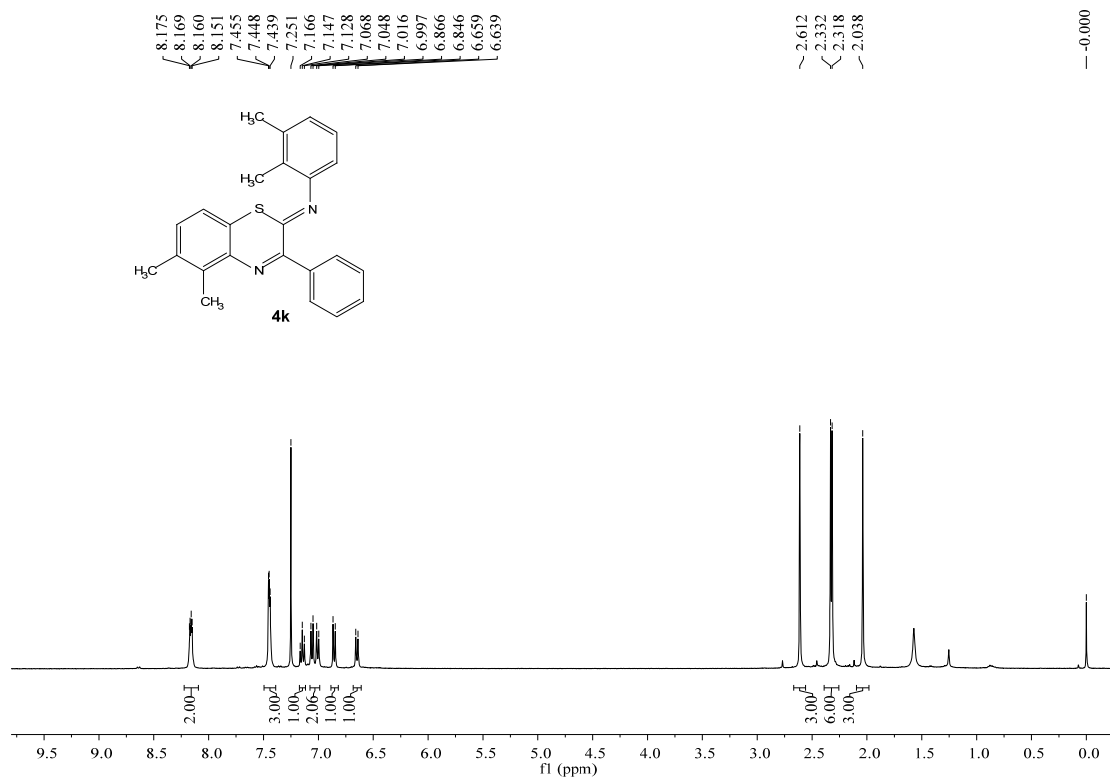

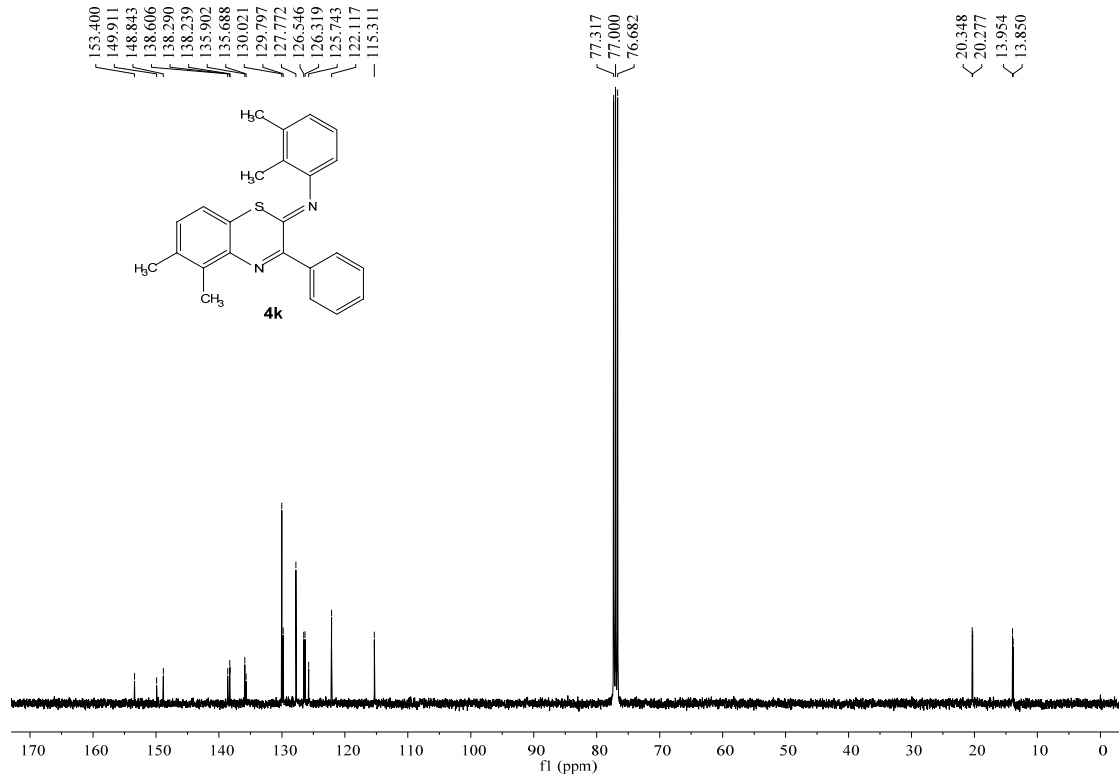

**<sup>1</sup>H and <sup>13</sup>C NMR spectra of 4l**

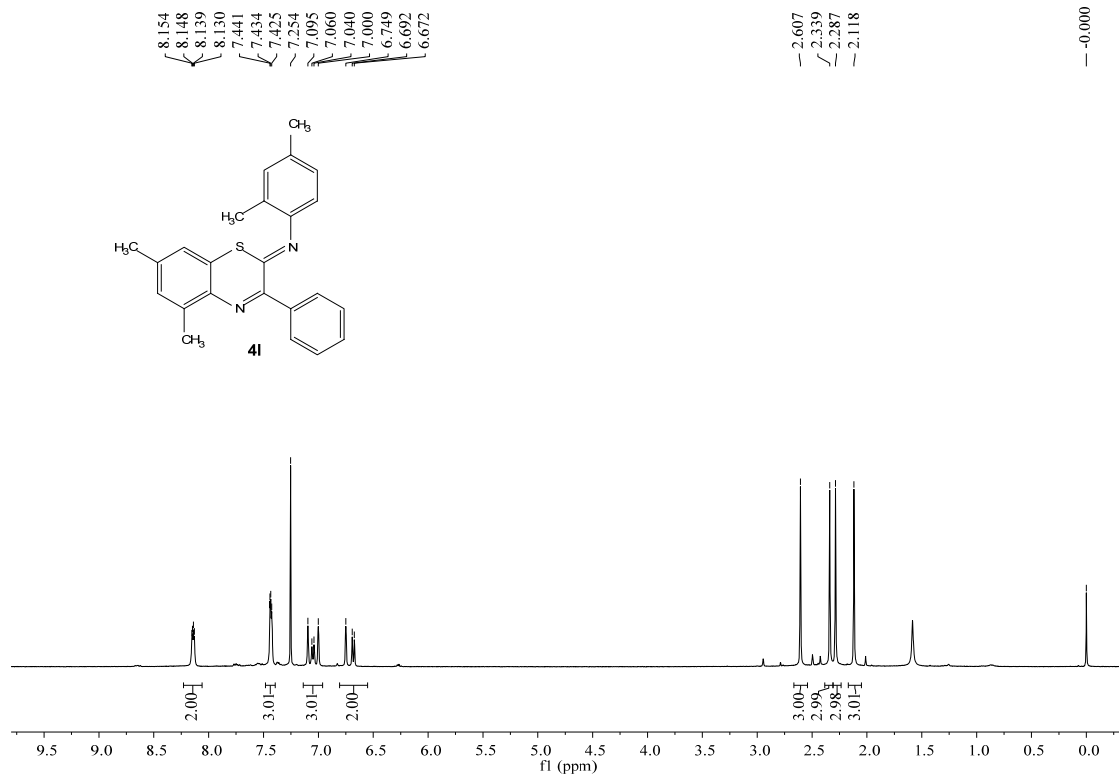

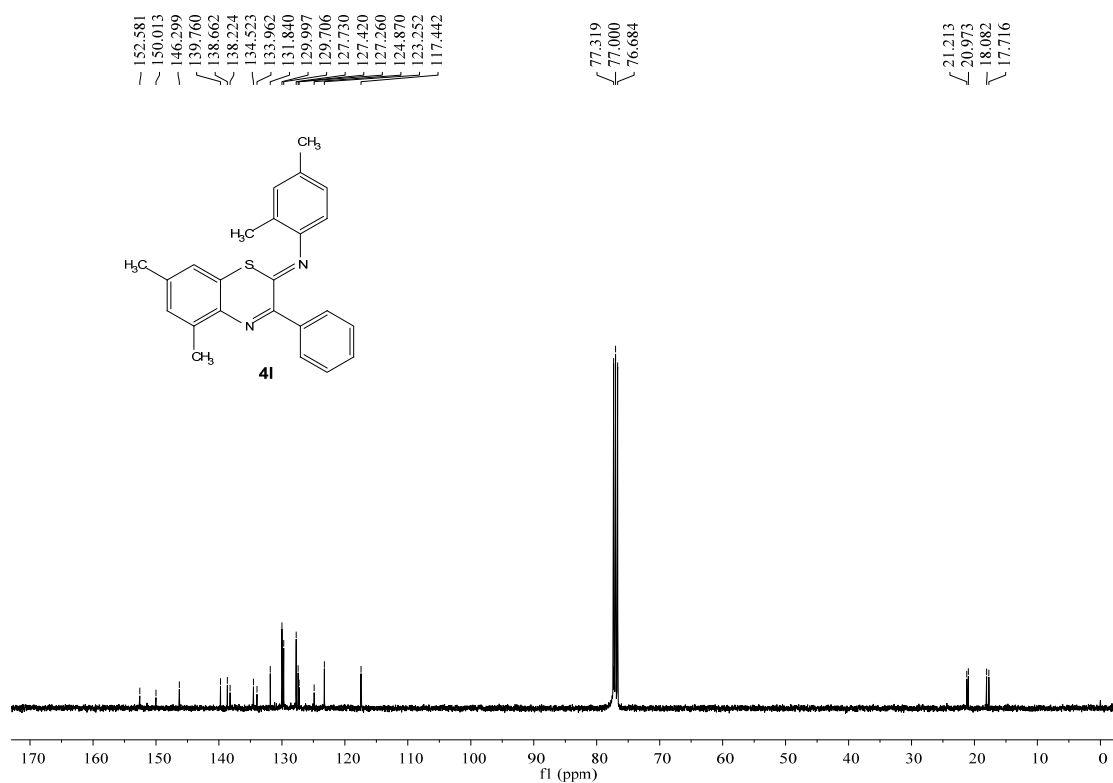

**<sup>1</sup>H and <sup>13</sup>C NMR spectra of 5a**

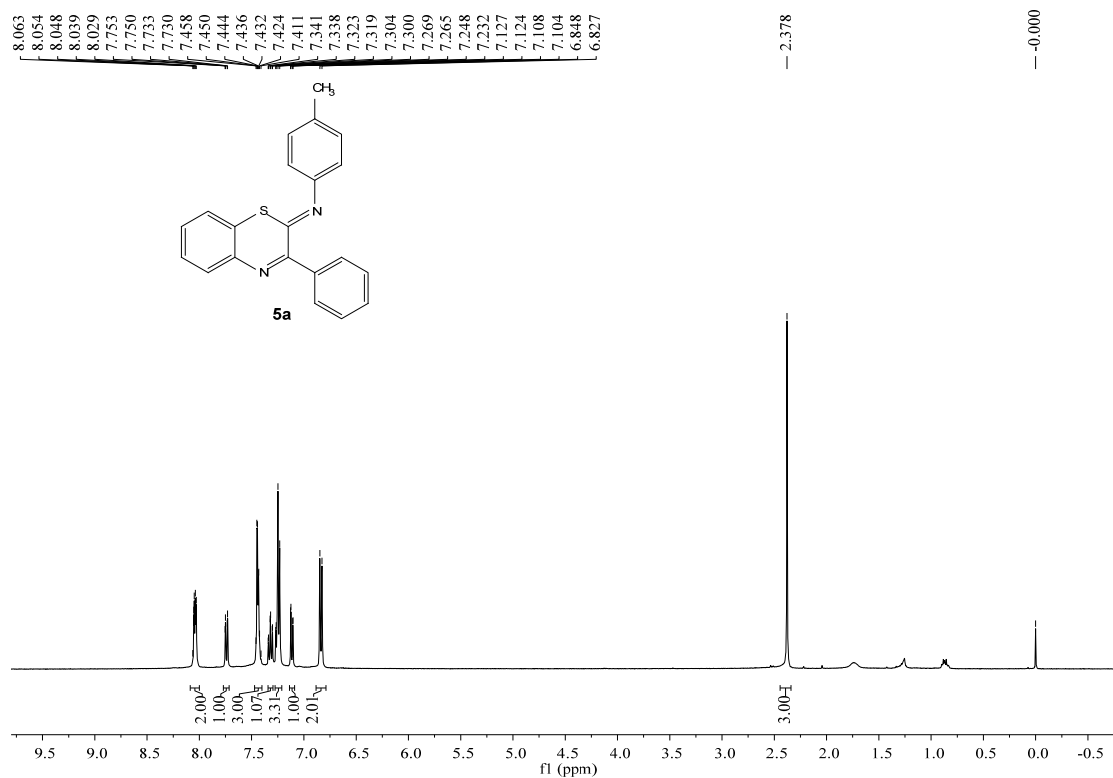

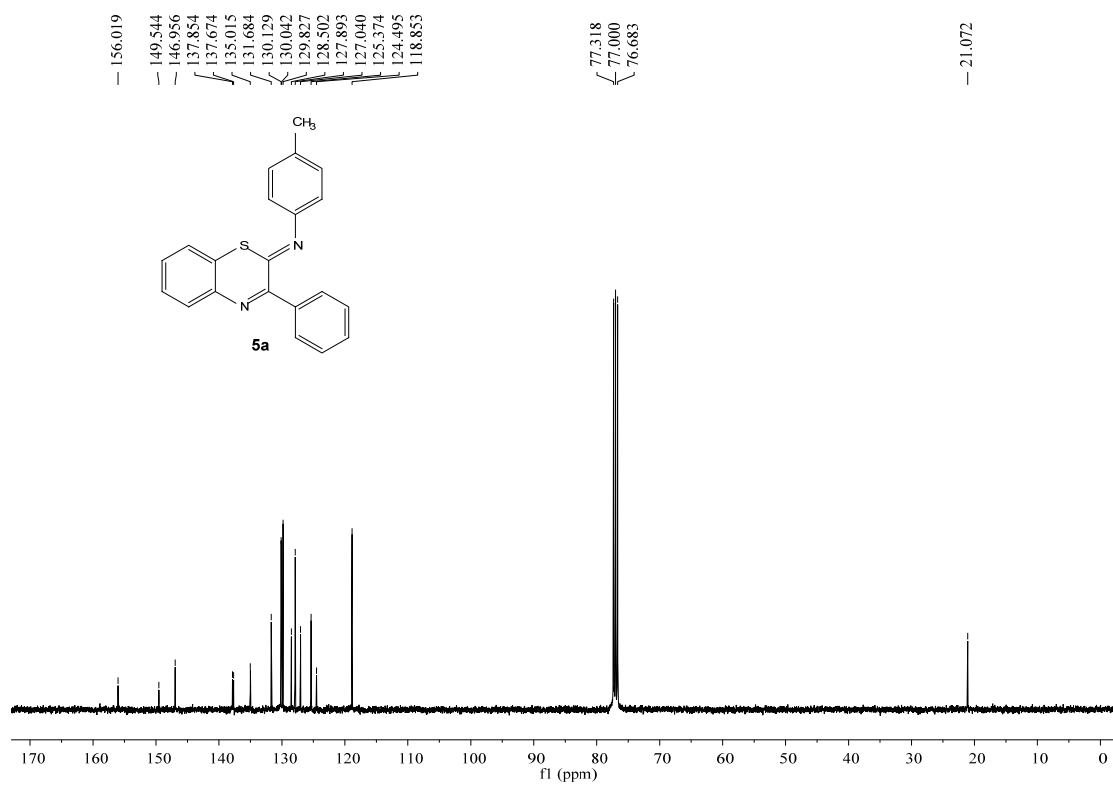

Supplement: d0ob00074d1.pdf [file d0ob00074d1.pdf]
